# Supplementary material for: Type 2 Diabetes Induced by Changes in Proteomic Profiling of Zebrafish Chronically Exposed to a Mixture of Organochlorine Pesticides at Low Concentrations
Source: MDPI journal article supplement (doi:10.3390/ijerph19094991), 2022-04-20

## **Supplemental Materials**

### **Type 2 diabetes induced by changes in proteomic profiling of zebrafish chronically exposed to a mixture of organochlorine pesticides at low concentrations**

Yan Gao<sup>1,a</sup>, Hyojin Lee<sup>2,a</sup>, Sangkyu Lee<sup>2,#</sup>, Ki-Tae Kim<sup>1,\*</sup>

<sup>1</sup>BK21 FOUR Community-Based Intelligent Novel Drug Discovery Education Unit, College  
of Pharmacy and Research Institute of Pharmaceutical Sciences, Kyungpook National  
University, Daegu 41566, Republic of Korea

<sup>2</sup>Department of Environmental Engineering, Seoul National University of Science and  
Technology, Seoul 01811, Republic of Korea

<sup>a</sup>These authors contributed equally to this work.

**<sup>#</sup>Co-Corresponding Author**

**\*Corresponding Author:**

Ki-Tae Kim, Ph. D.

Associate Professor, Department of Environmental Engineering

Seoul National University of Science and Technology

Phone: +82-2-970-6642

Fax: +82-2-970-5776

**Table S1.** Protein homology between zebrafish and human.

| Zebrafish   |                                                                                             | Ratio   |         |        |        |            | Human       |                                              |
|-------------|---------------------------------------------------------------------------------------------|---------|---------|--------|--------|------------|-------------|----------------------------------------------|
| Uniport no. | Description                                                                                 | 0.05/VH | 0.25/VH | 2.5/VH | 25/VH  | Regulation | Uniport no. | Description                                  |
| E7F103      | Cytochrome P450, family 2, subfamily X, polypeptide 10.2                                    | 0.1408  | 0.3243  | 0.3546 | 0.4793 | down       | P51589      | Cytochrome P450 2J2                          |
| E9QFI5      | Diazepam-binding inhibitor                                                                  | 0.5201  | 0.3399  | 0.6268 | 0.5566 | down       | P07108      | Acyl-CoA-binding protein                     |
| P52722      | Metallothionein-1                                                                           | 0.2638  | 0.3343  | 0.6783 | 0.5523 | down       | —           |                                              |
| B8JI17      | Prosaposin                                                                                  | 1.4011  | 0.5255  | 0.5526 | 0.4840 | down       | P07602      | Prosaposin                                   |
| A8DZ70      | Metadherin a                                                                                | 0.5932  | 0.5322  | 0.6659 | 0.8409 | down       | Q86UE4      | Protein LYRIC                                |
| Q5RI57      | Novel protein                                                                               | 1.2189  | 0.6343  | 0.4838 | 0.4314 | down       | P14222      | Perforin-1                                   |
| Q7SXM1      | Cytochrome c oxidase subunit                                                                | 0.5713  | 0.6517  | 0.4349 | 1.0476 | down       | P14854      | Cytochrome c oxidase subunit 6B1             |
| A3KPG5      | Pentaxin                                                                                    | 1.5395  | 1.6500  | 1.5888 | 1.6188 | up         | P02741      | C-reactive protein                           |
| Q7ZUM0      | Tyrosine 3-monooxygenase/tryptophan 5-monooxygenase activation protein, theta polypeptide a | 1.2742  | 1.5503  | 1.5686 | 1.7338 | up         | P63104      | 14-3-3 protein zeta/delta                    |
| Q6P3G9      | Endoplasmic reticulum protein 44                                                            | 1.5701  | 1.5026  | 1.2002 | 1.8709 | up         | Q9BS26      | Endoplasmic reticulum resident protein 44    |
| F1R7E6      | Iodothyronine deiodinase                                                                    | 0.4536  | 1.6392  | 1.7741 | 1.9650 | up         | P49895      | Type I iodothyronine deiodinase              |
| Q6PBJ8      | Peptidylprolyl isomerase                                                                    | 0.6250  | 1.5122  | 2.4524 | 2.0269 | up         | P68106      | Peptidyl-prolyl cis-trans isomerase FKBP1B   |
| F1R5X7      | Dehydrogenase/reductase (SDR family) member 11b                                             | 1.2716  | 1.6556  | 1.8453 | 2.1344 | up         | Q6UWP2      | Dehydrogenase/reductase SDR family member 11 |
| F1QWR0      | Nipsnap homolog 3A (C. elegans)                                                             | 1.1399  | 1.9640  | 1.8741 | 2.4264 | up         | Q9UFN0      | Protein NipSnap homolog 3A                   |
| Q6NYL5      | Alanine aminotransferase 2-like                                                             | 1.1524  | 1.6657  | 2.0939 | 2.6848 | up         | Q8TD30      | Alanine aminotransferase 2                   |

|            |                                        |        |        |        |        |    |        |                                          |
|------------|----------------------------------------|--------|--------|--------|--------|----|--------|------------------------------------------|
| A5PN40     | Crystallin, zeta (quinone reductase)   | 0.8716 | 1.7176 | 2.2955 | 2.7897 | up | Q08257 | Quinone oxidoreductase                   |
| E7F1Y3     | Si:zfos-411a11.2                       | 0.8300 | 1.6838 | 1.8907 | 2.9921 | up | Q16696 | Cytochrome P450 2A13                     |
| A0A0R4IPA1 | Calcium-activated nucleotidase 1b      | 1.1865 | 2.4563 | 1.9018 | 3.1827 | up | Q8WVQ1 | Soluble calcium-activated nucleotidase 1 |
| A0A0R4INN3 | Alanine--glyoxylate aminotransferase 2 | 0.9062 | 1.9414 | 2.7136 | 3.5599 | up | Q9BYV1 | Alanine--glyoxylate aminotransferase 2   |
| Q6DRD2     | 26S protease regulatory subunit S10B   | 0.6337 | 1.5174 | 3.1536 | 3.8520 | up | P62333 | 26S proteasome regulatory subunit 10B    |
| F1QCE3     | Peroxiredoxin 5                        | 0.7044 | 2.9685 | 3.1566 | 4.2799 | up | P30044 | Peroxiredoxin-5, mitochondrial           |
| Q90485     | Hemoglobin subunit beta-2              | 8.0481 | 1.2324 | 1.6037 | 9.4099 | up | P02100 | Hemoglobin subunit epsilon               |
| F8W5T8     | Zgc:152945                             | 0.4632 | 3.5085 | 3.3849 | 4.7427 | up | P02790 | Hemopexin                                |

**Figure S1.** Verification of protein pattern duplication efficiency. (a) Ratio correlation between the duplicated experiments, person correlation ( $r$ ) visualized as scatterplot. (b) Protein profiling by SDS-PAGE.

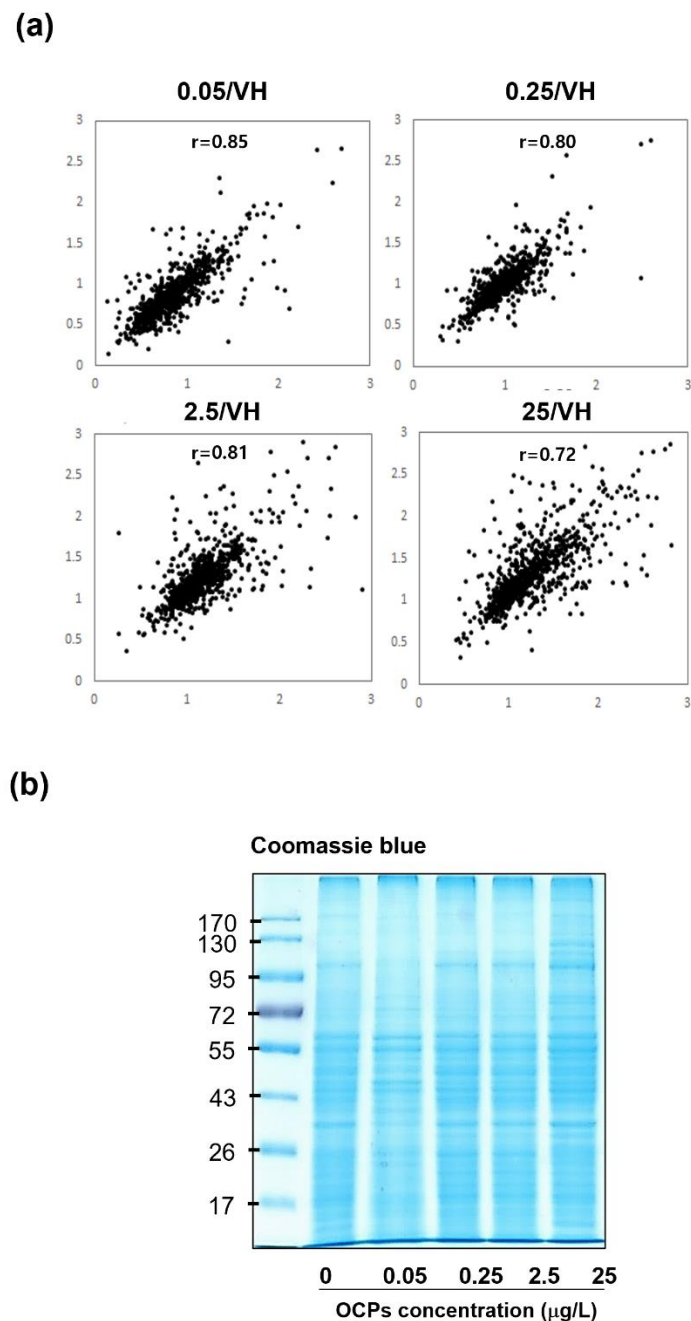

**Figure S2.** (A) Gene ontology (GO) enrichment analysis and (B) KEGG pathway- and Interpro-based enrichment analysis for proteins consistently up- and down-regulated at all tested concentrations.

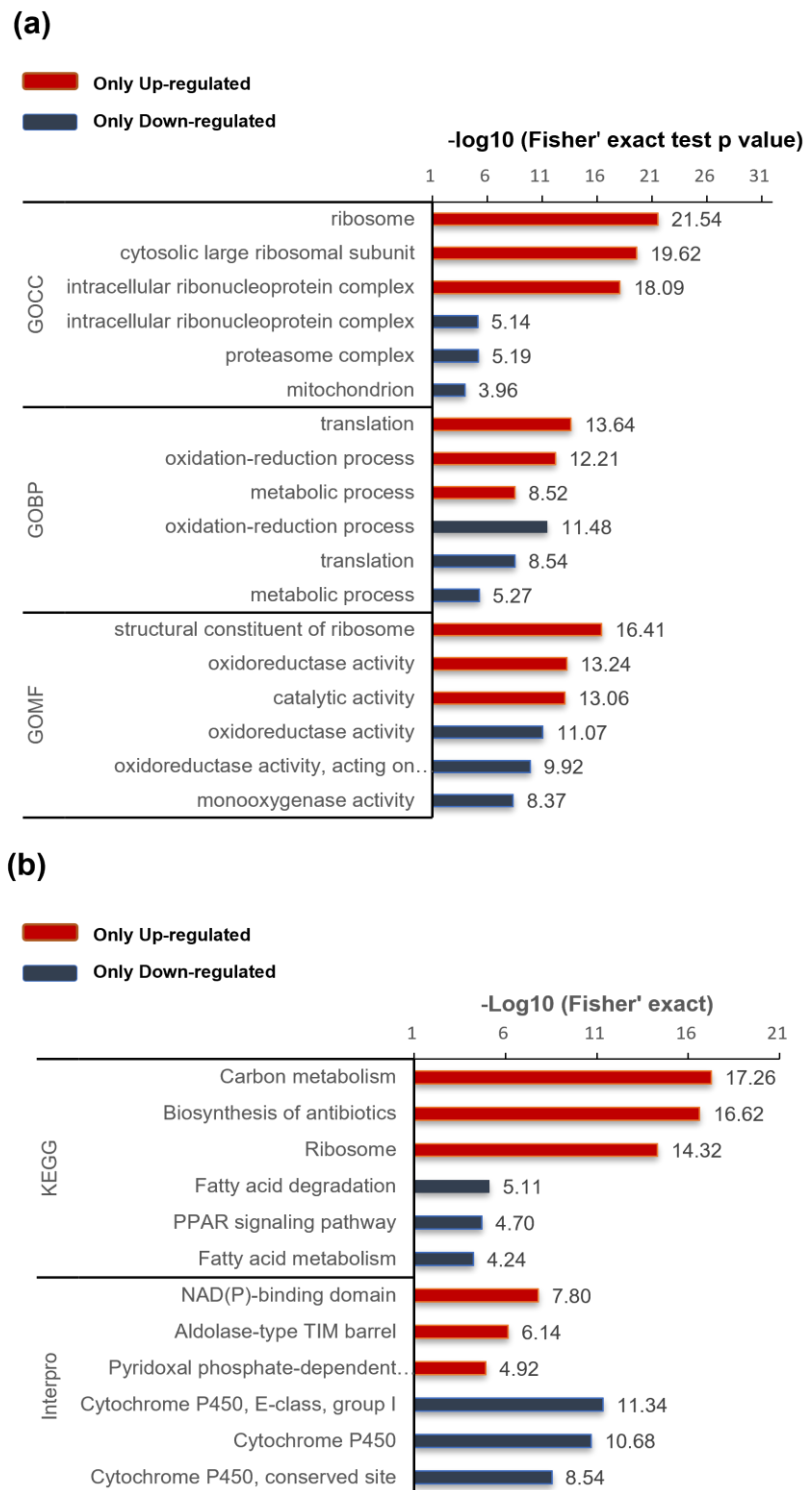

**Figure S3.** GO enrichment analysis of proteins in cluster 3. The Fisher's exact test P value was used to evaluate the enrichment efficiency.

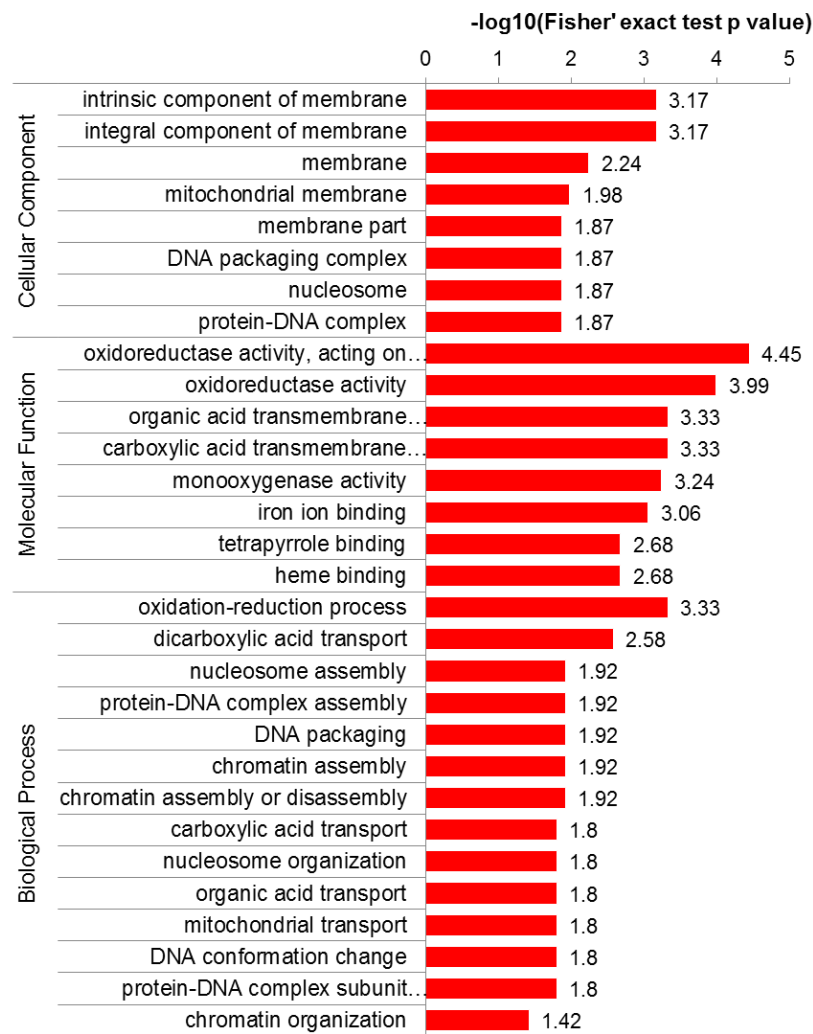

**Figure S4.** The functional protein association networks of differentially expressed proteins (a) up-regulated and (b) down-regulated at 0.05  $\mu\text{g/L}$  compared to control. This network was mapped in the STRING v.11.0 with a high confidence value of 0.9. The proteins and its connectivity are described by nodes and lines, respectively.

**(a) Up-regulated (0 vs 0.05)**

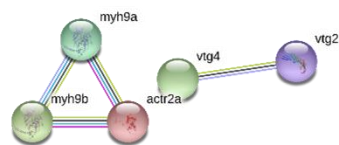

**(b) Down-regulated (0 vs 0.05)**

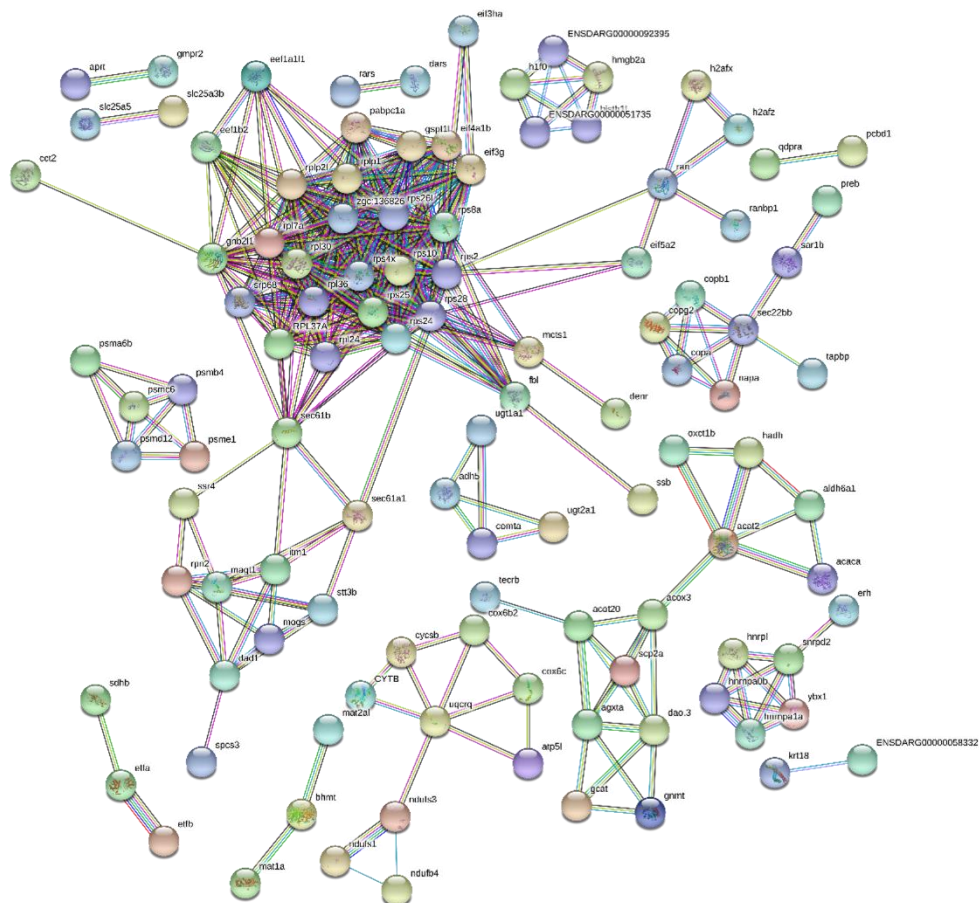

Supplement: s1 [file s1]
