# Supplementary material for: Type 2 Diabetes Induced by Changes in Proteomic Profiling of Zebrafish Chronically Exposed to a Mixture of Organochlorine Pesticides at Low Concentrations
Source: Int J Environ Res Public Health. 2022 Apr 20;19(9):4991. doi: 10.3390/ijerph19094991 (PMC9100612; doi:10.3390/ijerph19094991)
Supplement: Supplementary file 1 [file ijerph-19-04991-s001.zip › Supplemental Dataset 1 (XLSX).xlsx]

## Sheet: identified_protein list
Acession	Protein name	Gene name	# peptides	Sequence coverage [%]	0.01/VH	0.05/VH	0.5/VH	5/VH	Reporter intensity count 0	Reporter intensity count 1	Reporter intensity count 2	Reporter intensity count 3	Reporter intensity count 4	MS/MS Count
Q9MIX8	Cytochrome b	mt-cyb	2	5	0.44841	0.753151	0.800359	1.0788	1	1	1	1	1	5
A0A0G2KCA1			2	9.6	0.911285	1.21987	1.08141	1.15548	2	2	2	2	2	4
A0A0G2KCW6			2	3.2	#DIV/0!	#DIV/0!	#DIV/0!	#DIV/0!	0	0	0	0	0	3
A0A0G2KHA1		vcl	2	2.5	#DIV/0!	#DIV/0!	#DIV/0!	#DIV/0!	0	0	0	0	0	2
A0A0G2KL94		FP102272.1	2	11.5	#DIV/0!	#DIV/0!	#DIV/0!	#DIV/0!	0	0	0	0	0	4
A0A0G2KUJ0			2	7.3	0.652196	0.778691	1.36542	1.45719	2	2	2	2	2	3
A0A0G2KW99			2	6.5	#DIV/0!	#DIV/0!	#DIV/0!	#DIV/0!	0	0	0	0	0	7
A0A0G2L5K9			2	14.9	#DIV/0!	#DIV/0!	#DIV/0!	#DIV/0!	0	0	0	0	0	5
A0A0G2L612			2	7.2	0.925299	1.20538	1.22277	1.20385	2	2	2	2	2	3
A0A0G2L6T1			2	19.1	0.590955	1.25695	1.9854	2.82364	2	2	2	2	2	6
B0S6P6		ddx3	2	2.5	#DIV/0!	#DIV/0!	#DIV/0!	#DIV/0!	0	0	0	0	0	4
A0A0J9YJ53			2	10.4	#DIV/0!	#DIV/0!	#DIV/0!	#DIV/0!	0	0	0	0	0	3
E9QEB6		arf1l	2	20.1	0.593551	0.962535	1.28783	1.51427	6	6	6	6	6	20
Q6P3H7	Histone-binding protein RBBP4	rbbp4	2	2.1	#DIV/0!	#DIV/0!	#DIV/0!	#DIV/0!	0	0	0	0	0	2
A0A0R4IAC3			2	6.1	#DIV/0!	#DIV/0!	#DIV/0!	#DIV/0!	0	0	0	0	0	2
Q803W9		tagln2	2	10.4	1.3537	1.85993	2.28216	1.43607	2	2	2	2	2	5
A0A0R4IAQ9		atp2b4	2	6.2	#DIV/0!	#DIV/0!	#DIV/0!	#DIV/0!	0	0	0	0	0	2
A0A0R4IAU1			2	1.4	#DIV/0!	#DIV/0!	#DIV/0!	#DIV/0!	0	0	0	0	0	4
B8JI15		rpia	2	5.5	1.01516	0.892726	1.16865	0.994831	1	1	1	1	1	3
F1RC33		hnrnpl2	2	4.8	0.771654	0.930332	1.12759	1.2394	3	3	3	3	3	5
M9MMC8		ighm	2	6.6	0.882051	1.23048	1.56767	1.4198	3	3	3	3	3	6
Q6PC01		faua	2	8.3	0.823348	0.764262	1.62013	1.89379	4	4	4	4	4	8
A0A0R4II13			2	26.8	#DIV/0!	#DIV/0!	#DIV/0!	#DIV/0!	0	0	0	0	0	9
Q6IQH4		psmd8	2	8.2	#DIV/0!	#DIV/0!	#DIV/0!	#DIV/0!	0	0	0	0	0	2
A0A0R4IXZ6		eif4h	2	13	0.675658	1.05842	1.43325	1.49209	6	6	6	6	6	8
Q7SY06	Very-long-chain (3R)-3-hydroxyacyl-[acyl-carrier protein] dehydratase	ptplad1	2	6.4	#DIV/0!	#DIV/0!	#DIV/0!	#DIV/0!	0	0	0	0	0	3
A0A0R4IDG3		nudt5	2	18.2	#DIV/0!	#DIV/0!	#DIV/0!	#DIV/0!	0	0	0	0	0	3
Q6NWH7		ddx5	2	4	#DIV/0!	#DIV/0!	#DIV/0!	#DIV/0!	0	0	0	0	0	2
A8E7C9		sec23ip	2	2	#DIV/0!	#DIV/0!	#DIV/0!	#DIV/0!	0	0	0	0	0	2
A8E7G9		si:ch211-117n7.7	2	7.2	0.792886	0.841732	1.09572	0.939425	2	2	2	2	2	6
A0A0R4IGM8		mia3	2	1	2.40207	1.2682	1.31129	1.26746	2	2	2	2	2	3
A0A0R4IGQ6			2	7.1	#DIV/0!	#DIV/0!	#DIV/0!	#DIV/0!	0	0	0	0	0	2
A0A0R4IGT3		dpm1	2	12.4	0.309857	0.848468	1.04529	1.9424	1	1	1	1	1	2
A0A0R4IH55	Myb-binding protein 1A-like protein	mybbp1a	2	1.6	#DIV/0!	#DIV/0!	#DIV/0!	#DIV/0!	0	0	0	0	0	3
Q5RGA7		bpnt1	2	8.4	#DIV/0!	#DIV/0!	#DIV/0!	#DIV/0!	0	0	0	0	0	2
E9QG66		emc1	2	2	#DIV/0!	#DIV/0!	#DIV/0!	#DIV/0!	0	0	0	0	0	3
F1QJL0		chia.6	2	5.8	1.14163	1.38705	0.870871	1.00959	2	2	2	2	2	4
Q5U3A7	Dynamin-like 120 kDa protein, mitochondrial	opa1	2	2.6	#DIV/0!	#DIV/0!	#DIV/0!	#DIV/0!	0	0	0	0	0	4
Q2YDQ8		zgc:123007	2	4.7	#DIV/0!	#DIV/0!	#DIV/0!	#DIV/0!	0	0	0	0	0	5
E9QEA9		nqo1	2	11.4	1.28401	0.793992	0.841068	0.641209	1	1	1	1	1	3
A0A0R4IM99		tpm2	2	8.8	0.790359	0.697884	0.749887	0.408108	4	4	4	4	4	7
X1WDN1	SUMO-conjugating enzyme UBC9-B	ube2ib	2	15.6	#DIV/0!	#DIV/0!	#DIV/0!	#DIV/0!	0	0	0	0	0	3
A0A0R4ITM4		cirbp	2	12.4	0.54252	1.23704	2.74108	3.02656	7	7	7	7	7	16
A0A0R4INE8			2	12.9	0.734505	0.737467	0.868625	0.876532	1	1	1	1	1	2
A0A0R4IU44			2	2.1	1.51618	1.59082	1.03893	0.949316	1	1	1	1	1	4
A0A0R4INQ9		agpat4	2	8.2	#DIV/0!	#DIV/0!	#DIV/0!	#DIV/0!	0	0	0	0	0	5
A0A0R4IPH2			2	6.1	0.433911	0.825083	3.22414	3.71227	3	3	3	3	3	7
A0A0R4IS10		hnrnpm	2	2.8	0.884501	1.21101	1.441	1.56989	1	1	1	1	1	5
B0UYL0		ndufa10	2	6.2	#DIV/0!	#DIV/0!	#DIV/0!	#DIV/0!	0	0	0	0	0	4
A0A0R4IQG1			2	3.9	#DIV/0!	#DIV/0!	#DIV/0!	#DIV/0!	0	0	0	0	0	2
A0A0R4IQN8	Nascent polypeptide-associated complex subunit alpha	naca	2	2	0.92597	0.868728	0.964986	1.0536	5	5	5	5	5	10
Q7SXP0	Vesicle-trafficking protein SEC22b-B	sec22bb	2	7.9	0.587206	0.701587	1.48418	2.04736	1	1	1	1	1	3
F1QW17		camk2b1	2	4.2	#DIV/0!	#DIV/0!	#DIV/0!	#DIV/0!	0	0	0	0	0	2
E9QF92	Dynactin subunit 2	dctn2	2	9.2	#DIV/0!	#DIV/0!	#DIV/0!	#DIV/0!	0	0	0	0	0	2
A0A0R4IQY0			2	4.1	#DIV/0!	#DIV/0!	#DIV/0!	#DIV/0!	0	0	0	0	0	5
A0A0R4ITL8			2	13.6	0.772597	1.01441	1.22062	1.12735	2	2	2	2	2	3
B3DKI8		sly1	2	2.8	#DIV/0!	#DIV/0!	#DIV/0!	#DIV/0!	0	0	0	0	0	3
A5WVX8		metap2a	2	6.6	1.36604	1.27529	1.8957	1.79139	1	1	1	1	1	3
F1R6C8		ctnnd1	2	2.8	1.19633	0.948828	0.960699	0.763689	2	2	2	2	2	5
F1R293		adsl	2	3.9	0.990719	0.848073	1.10345	1.05391	1	1	1	1	1	3
A0A0R4IVC3		rbp4	2	14.2	1.56064	1.16021	1.36194	1.11942	1	1	1	1	1	5
A0A0R4IVC8			2	12.3	#DIV/0!	#DIV/0!	#DIV/0!	#DIV/0!	0	0	0	0	0	4
Q6PH37	Cytosolic sulfotransferase 1	sult1st1	2	6.4	#DIV/0!	#DIV/0!	#DIV/0!	#DIV/0!	0	0	0	0	0	3
F1QZ04		acy1	2	3.8	#DIV/0!	#DIV/0!	#DIV/0!	#DIV/0!	0	0	0	0	0	2
A0A0R4IWN8			2	21.5	0.919905	0.696787	0.923	0.713361	1	1	1	1	1	3
Q5TZD3	Dimethylaniline monooxygenase [N-oxide-forming]	si:dkey-239i20.2	2	3	#DIV/0!	#DIV/0!	#DIV/0!	#DIV/0!	0	0	0	0	0	3
A0A0R4IYM6		si:ch211-210c8.6	2	11.6	#DIV/0!	#DIV/0!	#DIV/0!	#DIV/0!	0	0	0	0	0	5
A0A0R4IZB1	Poly(U)-binding-splicing factor PUF60-B	puf60b	2	6	1.1639	1.05755	1.37814	1.06417	2	2	2	2	2	3
A0A0R4IZE6			2	7.1	#DIV/0!	#DIV/0!	#DIV/0!	#DIV/0!	0	0	0	0	0	6
A0A140LH63			2	12.4	1.21051	1.32567	2.2615	2.44434	1	1	1	1	1	2
A0A140LGB0			2	2.2	#DIV/0!	#DIV/0!	#DIV/0!	#DIV/0!	0	0	0	0	0	3
A0JMN1		cyp4v7	2	5.3	0.9046	1.02542	1.40864	1.30219	1	1	1	1	1	5
E7F103		cyp2x10.2	2	4.4	0.140833	0.324312	0.354634	0.479262	2	2	2	2	2	4
A1L1W9	Monocarboxylate transporter 10	slc16a10	2	3.6	0.694539	1.23894	0.757366	0.99692	1	1	1	1	1	3
E7FCD8		atp6v1ab	2	3.9	#DIV/0!	#DIV/0!	#DIV/0!	#DIV/0!	0	0	0	0	0	3
A2BF91		zgc:101858	2	7.5	0.690205	0.734811	1.00236	0.968259	2	2	2	2	2	3
Q71PD7	Histone H2A.V	h2afv	2	18.8	0.64246	1.33343	1.81067	1.43289	5	4	5	5	5	12
A2BG14		gda	2	4	0.910481	0.821766	1.19347	1.35275	1	1	1	1	1	3
A2BGN1		mvk	2	7.1	#DIV/0!	#DIV/0!	#DIV/0!	#DIV/0!	0	0	0	0	0	5
A2BGR9		aldh2.1	2	5	#DIV/0!	#DIV/0!	#DIV/0!	#DIV/0!	0	0	0	0	1	5
A2BGU5		lrpap1	2	5.2	#DIV/0!	#DIV/0!	#DIV/0!	#DIV/0!	0	0	0	0	0	2
A2CEM4		atl3	2	2.9	#DIV/0!	#DIV/0!	#DIV/0!	#DIV/0!	0	0	0	0	0	2
A3KMS9		prkacaa	2	7.4	0.880906	1.02055	1.11291	0.945745	1	1	1	1	1	4
A3KPZ2		cratb	2	4.6	0.912373	1.00102	1.05018	1.6673	2	2	2	2	2	5
A4IG53		comtb	2	11	0.788126	0.942691	1.28907	0.984333	3	3	3	3	3	6
E7F225		zgc:163061	2	19.3	#DIV/0!	#DIV/0!	#DIV/0!	#DIV/0!	0	0	0	0	0	5
A5A4L9		supt16h	2	2.1	#DIV/0!	#DIV/0!	#DIV/0!	#DIV/0!	0	0	0	0	0	4
A5D6S3		mut	2	2.8	#DIV/0!	#DIV/0!	#DIV/0!	#DIV/0!	0	0	0	0	0	4
A5PL98	Succinate dehydrogenase [ubiquinone] iron-sulfur subunit, mitochondrial	sdhb	2	8.9	0.602458	1.07298	1.18155	1.59076	4	4	4	4	4	6
A5PMC4		lman2	2	6.5	1.16636	0.931832	0.968251	0.840979	1	1	1	1	1	6
A5PMQ1		lta4h	2	3.6	#DIV/0!	#DIV/0!	#DIV/0!	#DIV/0!	0	0	0	0	0	4
A5PMZ3		scinlb	2	3.6	1.45192	1.47959	1.16227	0.975344	1	1	1	1	1	4
A5PN36		acot11a	2	3.3	0.936285	0.889817	0.966383	0.822095	1	1	1	1	1	2
A5PN40		cryz	2	16.1	0.871614	1.71763	2.29553	2.78969	3	3	2	3	3	4
A5WV37		zgc:92871	2	29.5	0.404189	1.08222	1.34291	1.898	4	4	4	4	4	10
A5WVI1		irgf1	2	5.5	#DIV/0!	#DIV/0!	#DIV/0!	#DIV/0!	0	0	0	0	0	3
F6P9F0		s100u	2	8.9	1.11638	1.05589	1.01383	0.794248	1	1	1	1	1	3
A7E2L0		dad1	2	17.7	0.562015	1.00667	1.52324	3.37672	2	2	2	2	2	8
A8E7N8	Proteasome subunit beta type	psmb4	2	16.4	0.562902	0.745468	1.35629	1.29045	3	3	3	3	3	8
A8E7S3		sdr16c5a	2	6.5	#DIV/0!	#DIV/0!	#DIV/0!	#DIV/0!	0	0	0	0	0	4
A8KB43		cbln8	2	8	2.18403	1.08924	1.04375	1.10043	1	1	1	1	1	4
Q504B8		pcbp3	2	9.1	0.714401	0.819034	0.913307	1.44889	2	2	2	2	2	4
A9C3T0		prkar2aa	2	6	#DIV/0!	#DIV/0!	#DIV/0!	#DIV/0!	0	0	0	0	0	3
A9JTB1	N-acetylneuraminate lyase	npl	2	6.8	#DIV/0!	#DIV/0!	#DIV/0!	#DIV/0!	0	0	0	0	0	2
B0R0D7	Coronin	coro1ca	2	3.2	1.2494	0.926551	1.06389	0.920727	1	1	1	1	1	3
B0S5D9		tm9sf2	2	5.2	0.484248	1.09652	1.55746	2.03315	1	1	1	1	1	4
B0S613		ufd1l	2	16.9	#DIV/0!	#DIV/0!	#DIV/0!	#DIV/0!	0	0	0	0	0	2
B0S7K7		scpep1	2	5.8	#DIV/0!	#DIV/0!	#DIV/0!	#DIV/0!	0	0	0	0	0	2
B0UY92		slc2a2	2	4	0.888795	1.12716	1.187	1.21164	1	1	1	1	1	4
B0UY94		eif5a2	2	15.6	0.309472	1.11395	2.14814	2.34249	2	2	2	2	2	7
H0WF44	Beta-2-microglobulin	b2m	2	15.2	0.753027	0.971845	0.962004	0.750289	1	1	1	1	1	3
B0V1J9		zgc:66350	2	6.6	#DIV/0!	#DIV/0!	#DIV/0!	#DIV/0!	0	0	0	0	0	5
B0V2R7		serping1	2	2.8	1.43788	1.34234	1.00029	1.03386	1	1	1	1	1	2
Q5XIY2	Transmembrane protein 56-B	tmem56b	2	8.3	0.377404	0.810187	1.19499	1.26568	1	1	1	1	1	5
Q6DGJ3	Mitochondrial import inner membrane translocase subunit Tim13	timm13	2	26.3	1.04645	0.89419	0.972766	0.985174	2	2	2	2	2	9
Q7SZE5	Protein transport protein Sec23A	sec23a	2	2.1	#DIV/0!	#DIV/0!	#DIV/0!	#DIV/0!	0	0	0	0	0	2
B3DFK4		LOC557217	2	32.7	#DIV/0!	#DIV/0!	#DIV/0!	#DIV/0!	0	0	0	0	0	4
B3DKM3		tmed3	2	10.7	0.913025	0.789254	1.05554	1.00035	1	1	1	1	1	4
B7ZUU8		ap3d1	2	1.9	#DIV/0!	#DIV/0!	#DIV/0!	#DIV/0!	0	0	0	0	0	2
Q90Y50	Coxsackievirus and adenovirus receptor homolog	cxadr	2	4.8	#DIV/0!	#DIV/0!	#DIV/0!	#DIV/0!	0	0	0	0	0	5
B8A454		bag2	2	8.7	1.20714	1.06329	0.947907	0.828779	1	1	1	1	1	3
B8A4E7		rrp12	2	1.4	#DIV/0!	#DIV/0!	#DIV/0!	#DIV/0!	0	0	0	0	0	2
B8A4H6		pgam1b	2	13.8	#DIV/0!	#DIV/0!	#DIV/0!	#DIV/0!	0	0	0	0	0	3
B8JIS5		gstm3	2	9.6	1.10648	1.22204	1.20957	1.0411	2	2	2	2	2	5
Q803J8	Zinc finger CCCH domain-containing protein 15	zc3h15	2	6.2	#DIV/0!	#DIV/0!	#DIV/0!	#DIV/0!	0	0	0	0	0	2
Q7SY03		pdcd6ip	2	3.7	#DIV/0!	#DIV/0!	#DIV/0!	#DIV/0!	0	0	0	0	0	3
B8JMA2		ugt2a5	2	3.4	#DIV/0!	#DIV/0!	#DIV/0!	#DIV/0!	0	0	0	0	0	3
F1RAE2	H/ACA ribonucleoprotein complex subunit 1	gar1	2	8	1.12896	0.641204	0.924249	0.883427	2	2	2	2	2	3
E7EXW7		aldh1l2	2	3.1	#DIV/0!	#DIV/0!	#DIV/0!	#DIV/0!	0	0	0	0	0	2
E7EXY4		CU929240.1	2	2.7	#DIV/0!	#DIV/0!	#DIV/0!	#DIV/0!	0	0	0	0	0	2
Q8UUX0		akt2	2	3.8	#DIV/0!	#DIV/0!	#DIV/0!	#DIV/0!	0	0	0	0	0	5
E7F0H8		hmgb3b	2	11.6	#DIV/0!	#DIV/0!	#DIV/0!	#DIV/0!	0	0	0	0	0	2
Q7ZVL1	Oxysterol-binding protein	osbpl2b	2	4.9	#DIV/0!	#DIV/0!	#DIV/0!	#DIV/0!	0	0	0	0	0	2
Q7ZVP8	Trimeric intracellular cation channel type B	tmem38b	2	8	0.715647	0.983748	0.871734	0.918579	1	1	1	1	1	3
F1QV93		si:dkey-97a13.6	2	0.7	#DIV/0!	#DIV/0!	#DIV/0!	#DIV/0!	0	0	0	0	0	2
E7F3I8		dhx15	2	2.9	#DIV/0!	#DIV/0!	#DIV/0!	#DIV/0!	0	0	0	0	0	4
E7F569		sb:cb252	2	7.1	#DIV/0!	#DIV/0!	#DIV/0!	#DIV/0!	0	0	0	0	0	2
E7F5V3		fasn	2	1.2	#DIV/0!	#DIV/0!	#DIV/0!	#DIV/0!	0	0	0	0	0	2
E7F7W7		LOC571042	2	1.8	#DIV/0!	#DIV/0!	#DIV/0!	#DIV/0!	0	0	0	0	0	2
R4GEY3		si:ch211-113a14.18	2	11.6	0.263417	0.992734	1.55612	1.42736	4	4	4	4	4	5
Q6DHB9		sccpdha	2	7.3	1.3283	1.31511	2.19442	4.84907	1	1	1	1	1	6
E7FBU7		xpo1b	2	2.1	#DIV/0!	#DIV/0!	#DIV/0!	#DIV/0!	0	0	0	0	0	3
Q9W762	Mitochondrial import inner membrane translocase subunit Tim9	timm9	2	32.1	1.1088	0.720953	0.660726	0.737636	1	1	1	1	1	2
E7FCQ0		cnbpb	2	12.4	0.409333	0.927315	2.22515	2.20858	3	3	3	3	3	4
E7FGP2		cars	2	3.5	#DIV/0!	#DIV/0!	#DIV/0!	#DIV/0!	0	0	0	0	0	5
E7FEQ1		lgals3l	2	7	#DIV/0!	#DIV/0!	#DIV/0!	#DIV/0!	0	0	0	0	0	3
E7FEZ9		atox1	2	26.9	#DIV/0!	#DIV/0!	#DIV/0!	#DIV/0!	0	0	0	0	0	3
E7FFJ7		LOC100333757	2	4.9	#DIV/0!	#DIV/0!	#DIV/0!	#DIV/0!	0	0	0	0	0	4
E7FGW2		eftud2	2	3.5	#DIV/0!	#DIV/0!	#DIV/0!	#DIV/0!	0	0	0	0	0	2
E9QDH1		cox7a1	2	38.3	0.476799	1.01044	1.13645	1.38103	2	2	2	2	2	10
E9QEE8		ndufb4	2	21	0.337126	0.500769	1.01239	1.14382	1	1	1	1	1	3
Q6P3L0	Major vault protein	mvp	2	3.8	1.29663	1.55135	1.0877	0.866423	2	2	2	2	2	5
E9QFI0		tceb2	2	20.2	1.04388	0.892683	0.990799	0.970362	1	1	1	1	1	3
E9QFV9		grb2b	2	16.1	#DIV/0!	#DIV/0!	#DIV/0!	#DIV/0!	0	0	0	0	0	3
E9QHY3		phf5a	2	20.6	#DIV/0!	#DIV/0!	#DIV/0!	#DIV/0!	0	0	0	0	0	3
I3ITR0		grna	2	29.7	#DIV/0!	#DIV/0!	#DIV/0!	#DIV/0!	0	0	0	0	0	4
E9QJ40		fam120c	2	2.6	0.766756	0.731029	1.49367	1.71353	2	2	2	2	2	7
E9QJ92		mgst2	2	24.8	0.761469	0.768966	1.10967	1.16495	4	4	4	4	4	11
Q5XJR0		eif1axa	2	14.6	#DIV/0!	#DIV/0!	#DIV/0!	#DIV/0!	0	0	0	0	0	3
F1Q4N7		anp32b	2	9.3	#DIV/0!	#DIV/0!	#DIV/0!	#DIV/0!	0	0	0	0	0	4
F1Q4S6		nol6	2	1.8	1.32801	1.0023	1.38293	1.0931	1	1	1	1	1	3
F1Q4Y0		arhgef1b	2	1.9	#DIV/0!	#DIV/0!	#DIV/0!	#DIV/0!	0	0	0	0	0	2
Q08CF4		enosf1	2	6.8	#DIV/0!	#DIV/0!	#DIV/0!	#DIV/0!	0	0	0	0	0	4
Q6NYY9	Vacuole membrane protein 1	vmp1	2	3.9	#DIV/0!	#DIV/0!	#DIV/0!	#DIV/0!	0	0	0	0	0	4
F8W2U7		phkb	2	2.6	#DIV/0!	#DIV/0!	#DIV/0!	#DIV/0!	0	0	0	0	0	2
F1Q7F9		sypl2a	2	10.6	#DIV/0!	#DIV/0!	#DIV/0!	#DIV/0!	0	0	0	0	0	5
F1Q7G9		zgc:158605	2	6.6	#DIV/0!	#DIV/0!	#DIV/0!	#DIV/0!	0	0	0	0	0	2
F1Q7N8		si:dkey-28b4.8	2	2.7	0.64738	0.952977	1.27442	1.34135	2	2	2	2	2	7
F1RBT4		c6ast3	2	5.9	1.26836	0.803832	0.728326	0.694971	1	1	1	1	1	4
F1Q890		plg	2	2.9	#DIV/0!	#DIV/0!	#DIV/0!	#DIV/0!	0	0	0	0	0	6
F1QAK5		nt5c2b	2	4.1	1.25597	1.12607	1.31059	1.62804	1	1	1	1	1	6
F1QBA0		bco2a	2	7.8	#DIV/0!	#DIV/0!	#DIV/0!	#DIV/0!	0	0	0	0	0	3
F1QC84		f13a1a.1	2	3.4	#DIV/0!	#DIV/0!	#DIV/0!	#DIV/0!	0	0	0	0	0	3
F1QCE3		prdx5	2	15.8	0.704404	2.96854	3.15656	4.27987	2	2	2	2	2	4
F1QCN0		zgc:112056	2	8.8	0.657416	0.973795	1.31626	1.55912	2	2	2	2	2	5
F1QD56		zgc:101699	2	3.4	#DIV/0!	#DIV/0!	#DIV/0!	#DIV/0!	0	0	0	0	0	3
F1QDW6		LOC569147	2	8.4	0.318192	0.991837	1.04757	1.55345	1	1	1	1	1	4
Q7ZVK3	NAD-dependent protein deacetylase sirtuin-2	sirt2	2	4.7	#DIV/0!	#DIV/0!	#DIV/0!	#DIV/0!	0	0	0	0	0	5
F1QF76		tmed1b	2	7.5	#DIV/0!	#DIV/0!	#DIV/0!	#DIV/0!	0	0	0	0	0	3
F1QF85		tfam	2	7.9	#DIV/0!	#DIV/0!	#DIV/0!	#DIV/0!	0	0	0	0	0	4
F1QFG2		papss2a	2	3.6	#DIV/0!	#DIV/0!	#DIV/0!	#DIV/0!	0	0	0	0	0	2
F1QFP1		copz1	2	10.6	1.15858	0.921688	1.19389	1.04324	2	2	2	2	2	4
F1QFV2		hnrnpa1	2	6.7	#DIV/0!	#DIV/0!	#DIV/0!	#DIV/0!	0	0	0	0	0	5
F1QGP1		aldh16a1	2	3	#DIV/0!	#DIV/0!	#DIV/0!	#DIV/0!	0	0	0	0	0	2
F1QGS9		LOC100535236	2	3.4	1.32849	1.14413	1.25963	1.32108	5	5	5	5	5	7
F1QHJ4		dap	2	14.3	0.624099	0.878716	1.26453	1.58628	1	1	1	1	1	3
F1QHT9		ddx19	2	4.1	#DIV/0!	#DIV/0!	#DIV/0!	#DIV/0!	0	0	0	0	0	4
F1QI32			2	7.7	#DIV/0!	#DIV/0!	#DIV/0!	#DIV/0!	0	0	0	0	0	2
F1QI99	Signal recognition particle subunit SRP68	srp68	2	3.2	0.646237	0.742436	1.29042	1.32233	2	2	2	2	2	3
F1QJ56		ndufb10	2	11.8	#DIV/0!	#DIV/0!	#DIV/0!	#DIV/0!	0	0	0	0	0	2
F1QJ73		sec62	2	4.6	#DIV/0!	#DIV/0!	#DIV/0!	#DIV/0!	0	0	0	0	0	4
F1QJV7		ddt	2	18.6	0.760315	1.02061	1.05751	1.18384	3	3	3	3	3	14
Q7SXF1	7-dehydrocholesterol reductase	dhcr7	2	4.6	#DIV/0!	#DIV/0!	#DIV/0!	#DIV/0!	0	0	0	0	0	3
F1QL72		ugt1ab	2	3.1	0.702405	0.840402	1.11904	0.848461	2	2	2	2	2	5
F1QLR1		cox4i2	2	12.4	#DIV/0!	#DIV/0!	#DIV/0!	#DIV/0!	0	0	0	0	0	4
F1QMK1		si:ch211-213a13.8	2	0.7	#DIV/0!	#DIV/0!	#DIV/0!	#DIV/0!	0	0	0	0	0	2
F1QNN4		2017-09-02	2	7.9	#DIV/0!	#DIV/0!	#DIV/0!	#DIV/0!	0	0	0	0	0	3
Q5U373		cab39l	2	5.1	0.857318	0.90248	0.976079	0.989398	1	1	1	1	1	3
F1QP99		zgc:77086	2	3.7	#DIV/0!	#DIV/0!	#DIV/0!	#DIV/0!	0	0	0	0	0	6
F1QQI6		tomm70a	2	4.7	#DIV/0!	#DIV/0!	#DIV/0!	#DIV/0!	0	0	0	0	0	2
F1QQW9	Elongation factor 1-alpha	si:dkey-37o8.1	2	3.1	#DIV/0!	#DIV/0!	#DIV/0!	#DIV/0!	0	0	0	0	0	2
F1QRF8		atad3b	2	9.5	0.87167	0.664735	0.690936	0.900685	1	1	1	1	1	2
U3JAV8		cad	2	0.9	0.578358	0.679292	0.878835	0.880773	1	1	1	1	1	2
F1QSM3		cyp2x7	2	4.1	0.565039	1.26111	0.532998	1.07668	1	1	1	1	1	3
F1QTI1		clic2	2	14.2	#DIV/0!	#DIV/0!	#DIV/0!	#DIV/0!	0	0	0	0	0	2
F1QTN8		LOC559236	2	5.7	0.891441	0.468503	1.45705	1.10826	1	1	1	2	1	4
F1QTW8		matr3l1.2	2	4.5	0.763354	1.07807	1.34004	1.96095	1	1	1	1	1	4
Q6NV32	Prothymosin alpha-A	ptmaa	2	22.9	0.810286	0.922401	1.1395	1.11427	3	3	3	3	3	3
F1QVC6		srsf9	2	9.8	#DIV/0!	#DIV/0!	#DIV/0!	#DIV/0!	0	0	0	0	0	3
I3ISH4		lypla2	2	9	0.673993	1.14349	1.38415	1.46132	2	2	2	2	2	5
X1WF59		zgc:174895	2	9.1	#DIV/0!	#DIV/0!	#DIV/0!	#DIV/0!	0	0	0	0	0	3
F1QWW8		kdsr	2	4.7	#DIV/0!	#DIV/0!	#DIV/0!	#DIV/0!	0	0	0	0	0	3
F1QY65		prpf6	2	1.8	#DIV/0!	#DIV/0!	#DIV/0!	#DIV/0!	0	0	0	0	0	3
F1QYW8		nap1l4a	2	5.7	#DIV/0!	#DIV/0!	#DIV/0!	#DIV/0!	0	0	0	0	0	3
F1QZ09		aclya	2	2.3	#DIV/0!	#DIV/0!	#DIV/0!	#DIV/0!	0	0	0	0	0	2
F1QZ15		tprkb	2	17.7	#DIV/0!	#DIV/0!	#DIV/0!	#DIV/0!	0	0	0	0	0	2
F1QZ60		xrcc6	2	2.6	#DIV/0!	#DIV/0!	#DIV/0!	#DIV/0!	0	0	0	0	0	2
F1QZU5	Tyrosine-protein phosphatase non-receptor type	ptpn11a	2	3.5	0.799992	0.917014	1.45526	1.36194	1	1	1	1	1	3
F1R0C0		pgls	2	7.5	#DIV/0!	#DIV/0!	#DIV/0!	#DIV/0!	0	0	0	0	0	2
F1R1T5		zgc:136472	2	3.5	1.14882	0.808389	0.98481	0.935617	1	1	1	1	1	2
F1R1X4		atp13a	2	2.2	#DIV/0!	#DIV/0!	#DIV/0!	#DIV/0!	0	0	0	0	0	3
F1R2B9		cbln10	2	7.4	#DIV/0!	#DIV/0!	#DIV/0!	#DIV/0!	0	0	0	0	0	4
Q7ZV34	Malignant T-cell-amplified sequence 1	mcts1	2	14.9	0.557721	0.975096	1.7254	1.1443	2	2	2	2	2	3
Q1LXM2		tpm4a	2	8.3	#DIV/0!	#DIV/0!	#DIV/0!	#DIV/0!	0	0	0	0	0	4
F1R442		zgc:110251	2	2.5	#DIV/0!	#DIV/0!	#DIV/0!	#DIV/0!	0	0	0	0	0	2
F1R452		acsl4a	2	3.1	#DIV/0!	#DIV/0!	#DIV/0!	#DIV/0!	0	0	0	0	0	7
F1R4I7		sri	2	12.1	1.06867	1.45873	1.16698	0.847721	3	3	3	3	3	7
F1R6E5		rad23b	2	4.5	0.818508	1.05732	1.25937	1.16471	1	1	1	1	1	3
F1R6G3		lum	2	5.6	#DIV/0!	#DIV/0!	#DIV/0!	#DIV/0!	0	0	0	0	0	3
F1R6R2		si:ch211-270n8.1	2	14.1	0.703719	1.91017	0.920666	1.67586	3	2	4	4	4	15
F1R9W6		zgc:110239	2	2.9	#DIV/0!	#DIV/0!	#DIV/0!	#DIV/0!	0	0	0	0	0	3
F1RBG8		zgc:153129	2	21.8	#DIV/0!	#DIV/0!	#DIV/0!	#DIV/0!	0	0	0	0	0	2
F1RCM3	Proteasome subunit beta type	psmb6	2	9.1	#DIV/0!	#DIV/0!	#DIV/0!	#DIV/0!	0	0	0	0	0	2
F1RDB7		mcee	2	10.9	#DIV/0!	#DIV/0!	#DIV/0!	#DIV/0!	0	0	0	0	0	5
F1RDQ5	Beta-hexosaminidase	hexa	2	5.8	#DIV/0!	#DIV/0!	#DIV/0!	#DIV/0!	0	0	0	0	0	2
F1RE59		ugt5a1	2	4.4	#DIV/0!	#DIV/0!	#DIV/0!	#DIV/0!	0	0	0	0	0	3
F2Z4T7		lman2lb	2	8.3	1.64962	1.07195	1.11582	0.899298	1	1	1	1	1	2
F6NPA3			2	11.9	0.979932	1.11033	0.738967	0.829615	1	1	1	1	1	2
F6P873			2	20.2	#DIV/0!	#DIV/0!	#DIV/0!	#DIV/0!	0	0	0	0	0	3
F6PBM1		macrod1	2	9.8	1.48319	0.974344	1.01159	0.87583	1	1	1	1	1	4
Q4VBT1	Fatty acid binding protein 1-B.1	fabp1b.1	2	19.5	#DIV/0!	#DIV/0!	#DIV/0!	#DIV/0!	0	0	0	0	0	4
F8W2M8		tpp1	2	3.4	1.60961	1.06719	0.942084	0.845399	1	1	1	1	1	5
F8W2V6		idh3b	2	4.4	#DIV/0!	#DIV/0!	#DIV/0!	#DIV/0!	0	0	0	0	0	3
F8W2Z3		hnrnpab	2	12.5	#DIV/0!	#DIV/0!	#DIV/0!	#DIV/0!	0	0	0	0	0	6
F8W3H2		atp5e	2	29.4	#DIV/0!	#DIV/0!	#DIV/0!	#DIV/0!	0	0	0	0	0	3
F8W4R3		aprt	2	10.7	0.372434	0.9271	1.23436	3.02743	1	1	1	1	1	2
Q7SZC2	Exportin-2	cse1l	2	1.8	#DIV/0!	#DIV/0!	#DIV/0!	#DIV/0!	0	0	0	0	0	3
Q08C78		btf3	2	19.8	1.23746	0.494496	1.77361	1.68402	2	2	1	2	2	5
Q0IIQ6		aqp12	2	9.1	0.475254	0.545409	0.703271	0.858471	1	1	1	1	1	6
Q1JPX3	Phenylalanine--tRNA ligase alpha subunit	farsa	2	4.2	#DIV/0!	#DIV/0!	#DIV/0!	#DIV/0!	0	0	0	0	0	3
Q1L864	Protein jagunal homolog 1-B	jagn1b	2	7.1	#DIV/0!	#DIV/0!	#DIV/0!	#DIV/0!	0	0	0	0	0	5
Q1LUK1	Protein QIL1	qil1	2	23.4	#DIV/0!	#DIV/0!	#DIV/0!	#DIV/0!	0	0	0	0	0	8
Q1LVD7		efhd2	2	9	#DIV/0!	#DIV/0!	#DIV/0!	#DIV/0!	0	0	0	0	0	2
Q1LY62		map2k2a	2	5.8	#DIV/0!	#DIV/0!	#DIV/0!	#DIV/0!	0	0	0	0	0	2
Q568A3		capns1a	2	14.1	0.611556	1.28667	1.42465	1.54667	1	1	1	1	1	3
X1WD56		si:dkey-179j5.2	2	4.9	#DIV/0!	#DIV/0!	#DIV/0!	#DIV/0!	0	0	0	0	0	2
Q1MTD3	mRNA cap guanine-N7 methyltransferase	rnmt	2	4.2	#DIV/0!	#DIV/0!	#DIV/0!	#DIV/0!	0	0	0	0	0	2
Q1RLR9	Histone H2A	h2afy	2	5.9	#DIV/0!	#DIV/0!	#DIV/0!	#DIV/0!	0	0	0	0	0	8
Q499A2		plgrkt	2	15.4	0.71497	1.07583	1.12474	1.03046	2	2	2	2	2	5
Q499B2		spcs1	2	25.5	0.782282	1.32507	2.66476	2.97393	1	1	1	1	1	5
Q502P6		ndufs5	2	22.6	#DIV/0!	#DIV/0!	#DIV/0!	#DIV/0!	0	0	0	0	0	3
Q504B1		sub1a	2	19.5	1.20219	1.09804	1.32853	0.952411	3	3	3	3	3	9
Q566V8		mrpl12	2	12.9	0.863431	0.942941	1.06943	1.22474	1	1	1	1	1	6
Q566W6		zgc:112425	2	12.4	0.72713	1.33024	2.43889	2.57733	4	3	4	4	4	6
Q567C7		pecr	2	8.4	0.814892	1.14364	1.39607	1.5653	4	4	4	4	4	5
Q567V5		snrpd2	2	15.3	0.553848	0.719337	0.977691	1.25854	2	2	2	2	2	3
Q5BL99		dnl2l	2	32.6	#DIV/0!	#DIV/0!	#DIV/0!	#DIV/0!	0	0	0	2	2	7
Q5BLE6		zgc:113054	2	3.6	0.611404	0.574619	0.89639	1.49664	1	1	1	1	1	4
Q5CZQ1		ywhae2	2	9	0.650632	0.634383	0.850795	0.838863	3	3	3	3	3	4
Q5RHB8	Branched-chain-amino-acid aminotransferase	bcat1	2	6.5	0.856295	0.714936	1.02035	1.12715	1	1	1	1	1	3
Q5RKP8		smx5	2	27.4	#DIV/0!	#DIV/0!	#DIV/0!	#DIV/0!	0	0	0	0	0	2
Q5SPD1		eef1db	2	12	#DIV/0!	#DIV/0!	#DIV/0!	#DIV/0!	0	0	0	0	0	4
Q5XJ39		mcfd2	2	18.8	#DIV/0!	#DIV/0!	#DIV/0!	#DIV/0!	0	0	0	0	0	4
Q5XJA3	Protein PRRC1	prrc1	2	5.7	#DIV/0!	#DIV/0!	#DIV/0!	#DIV/0!	0	0	0	0	0	2
Q66HU7		pxmp2	2	9.3	#DIV/0!	#DIV/0!	#DIV/0!	#DIV/0!	0	0	0	0	0	5
Q66I80		fabp11a	2	10.4	1.39594	1.03564	1.22993	1.16893	2	2	2	2	2	5
Q66L49	Calcium-binding mitochondrial carrier protein SCaMC-1	slc25a24	2	2.9	#DIV/0!	#DIV/0!	#DIV/0!	#DIV/0!	0	0	0	0	0	2
Q6AZA2		ndufv1	2	4.1	0.718252	0.871805	0.94111	0.981792	2	2	2	2	2	13
Q6DEM5	Mitochondrial import inner membrane translocase subunit Tim8 A	timm8a	2	28.9	#DIV/0!	#DIV/0!	#DIV/0!	#DIV/0!	0	0	0	0	0	2
Q6DH65	Density-regulated protein	denr	2	8.2	0.6045	0.509545	1.10858	0.996876	1	1	1	1	1	3
Q6DH69	Fatty-acid amide hydrolase 2-A	faah2a	2	8.6	1.23571	1.26468	1.4495	1.05851	1	2	2	3	2	5
Q6DI32		snx5	2	5	#DIV/0!	#DIV/0!	#DIV/0!	#DIV/0!	0	0	0	0	0	2
Q6DRI5	Nucleolar GTP-binding protein 1	gtpbp4	2	4.3	#DIV/0!	#DIV/0!	#DIV/0!	#DIV/0!	0	0	0	0	0	3
Q6GQM3	Proteasome subunit alpha type	psma6l	2	11.5	0.629308	1.11116	1.36435	1.39984	1	1	1	1	1	2
Q6IQL7		ppid	2	4.6	0.835066	0.801696	1.32711	1.25959	2	2	2	2	2	3
Q6NUW5	Acidic leucine-rich nuclear phosphoprotein 32 family member E	anp32e	2	10.4	0.611713	0.788893	1.39062	1.5198	1	1	1	1	1	4
Q6NV04	Acetolactate synthase-like protein	ilvbl	2	3.4	0.912742	1.13566	1.18289	1.14648	1	1	1	1	1	5
Q6NV33		idh3a	2	6	#DIV/0!	#DIV/0!	#DIV/0!	#DIV/0!	0	0	0	0	0	3
Q6NXA5		pon2	2	7	1.09711	0.82027	0.930008	0.885942	4	4	4	4	4	7
Q6NY24		plscr3b	2	4.8	#DIV/0!	#DIV/0!	#DIV/0!	#DIV/0!	0	0	0	0	0	2
Q6NY41		cyb5b	2	11.1	0.802308	0.768575	1.07289	1.25557	1	1	1	1	1	3
Q6NYS4		pebp1	2	10.2	0.649744	0.972311	1.13654	1.01768	4	4	4	4	4	8
Q6NYX2		tardbpl	2	6.7	#DIV/0!	#DIV/0!	#DIV/0!	#DIV/0!	0	0	0	0	0	5
Q6NZ06	Interleukin enhancer-binding factor 2 homolog	ilf2	2	8.8	#DIV/0!	#DIV/0!	#DIV/0!	#DIV/0!	0	0	0	1	1	4
Q6NZZ1		zgc:77938	2	4.5	#DIV/0!	#DIV/0!	#DIV/0!	#DIV/0!	0	0	0	0	0	3
Q6P0T0		ndufs8a	2	9.5	0.880959	0.992867	1.59656	1.67989	3	3	3	3	3	7
Q6P119		LOC100332034	2	22.3	#DIV/0!	#DIV/0!	#DIV/0!	#DIV/0!	0	0	0	0	0	6
Q6P1S3		xpnpep1	2	4.5	#DIV/0!	#DIV/0!	#DIV/0!	#DIV/0!	0	0	0	0	0	2
Q6P3I8		gcdh	2	4.5	0.727744	1.04978	1.07404	1.16684	1	1	1	1	1	2
Q6P3J2		arhgdia	2	16.3	#DIV/0!	#DIV/0!	#DIV/0!	#DIV/0!	0	0	0	0	0	2
Q6P5K5		rplp1	2	48.7	0.181723	0.435984	1.70938	3.03409	1	1	1	1	1	4
Q6PE45		rer1	2	13.8	1.18295	1.44464	1.77331	2.09065	1	1	1	1	1	2
Q6PGV1	V-type proton ATPase subunit d 1	atp6v0d1	2	5.1	#DIV/0!	#DIV/0!	#DIV/0!	#DIV/0!	0	0	0	0	0	2
Q6PHE8	Coiled-coil domain-containing protein 124	ccdc124	2	11.1	#DIV/0!	#DIV/0!	#DIV/0!	#DIV/0!	0	0	0	0	0	2
Q6PHG2	Hemopexin	hpx	2	3.6	1.67246	1.04435	0.79122	1.00469	2	2	2	2	2	4
Q6XG62		icn	2	25.3	0.756072	1.30232	1.27977	1.33791	3	3	3	3	3	5
Q7SZQ7	Surfeit locus protein 4	surf4	2	8.9	0.614105	1.08158	1.39504	1.33552	1	1	1	1	1	3
Q7T2A8	SH3 domain-binding glutamic acid-rich-like protein	zgc:64130	2	25.2	0.73957	1.45285	1.21728	1.2478	2	2	2	2	2	4
Q7T2F5		napa	2	11.2	0.628346	1.23591	1.735	2.02023	3	3	3	3	3	6
Q7T303		cnn3a	2	7.9	1.39753	1.07349	1.10699	1.21598	2	2	2	2	2	8
Z4YJ68	CDGSH iron-sulfur domain-containing protein 2	cisd2	2	15.2	#DIV/0!	#DIV/0!	#DIV/0!	#DIV/0!	0	0	0	0	0	4
Q7T387		abhd14b	2	11.7	0.761936	1.4172	1.61354	1.6329	4	4	4	4	4	8
Q7T3B8		naa10	2	8	#DIV/0!	#DIV/0!	#DIV/0!	#DIV/0!	0	0	0	0	0	2
Q7T3C9		srp19	2	15.6	0.698552	0.902711	1.44096	1.46371	3	3	3	3	3	5
Q7ZUI0		rpl5a	2	5.4	1.01395	0.751049	1.32533	1.25112	2	2	2	2	2	3
Q7ZUJ8	Proteasome subunit beta type	psmb3	2	13.2	#DIV/0!	#DIV/0!	#DIV/0!	#DIV/0!	0	0	0	0	0	2
Q7ZUM0		ywhaqa	2	17.1	1.27422	1.55027	1.56856	1.7338	5	5	5	5	5	10
Q7ZUQ0		arpc1a	2	4.1	#DIV/0!	#DIV/0!	#DIV/0!	#DIV/0!	0	0	0	0	0	4
Q7ZUY3	Histone H2A.x	h2afx	2	14.1	0.620655	1.06884	1.70569	1.59739	3	3	3	3	3	8
Q7ZV92		prp19	2	5.1	0.703208	0.86391	0.955442	1.07917	3	3	3	3	3	5
Q7ZVA4		s100a10b	2	18	#DIV/0!	#DIV/0!	#DIV/0!	#DIV/0!	0	0	0	0	0	2
Q7ZYX7		psmd7	2	6.4	#DIV/0!	#DIV/0!	#DIV/0!	#DIV/0!	0	0	0	0	0	7
Q7ZZJ7		slc4a1a	2	2	0.280597	0.907097	2.26807	2.94085	1	1	1	1	1	4
Q802Z3		pitpnbl	2	7.4	#DIV/0!	#DIV/0!	#DIV/0!	#DIV/0!	0	0	0	0	0	3
Q802Z5		nono	2	5.2	1.07581	0.968094	1.08108	1.09363	1	1	1	1	1	2
Q803G3	Serine/threonine-protein phosphatase	ppp2cb	2	11	0.964171	0.55347	1.27953	1.79603	2	2	2	2	2	5
Q8AX99		actn3b	2	2.4	0.554443	1.10278	1.37551	1.4748	1	1	1	1	1	6
Q8AY63		ckbb	2	4.7	#DIV/0!	#DIV/0!	#DIV/0!	#DIV/0!	0	0	0	0	0	4
Q8UW07		cyp1a	2	4	0.880548	0.961019	0.904709	0.931957	1	1	1	1	1	3
Q90485	Hemoglobin subunit beta-2	ba2	2	16.9	8.04811	1.23243	1.60366	9.40993	2	2	2	2	2	6
Q90X41		sf3a1	2	2.8	#DIV/0!	#DIV/0!	#DIV/0!	#DIV/0!	0	0	0	0	0	4
Q90Z77		htatip2	2	9.3	#DIV/0!	#DIV/0!	#DIV/0!	#DIV/0!	0	0	0	0	0	3
Q9I9E5	Small nuclear ribonucleoprotein-associated protein	snrpb	2	9.6	#DIV/0!	#DIV/0!	#DIV/0!	#DIV/0!	0	0	0	0	0	2
Q9MIY0	NADH-ubiquinone oxidoreductase chain 5	mt-nd5	2	4.5	0.688618	1.12451	1.50757	1.2199	2	2	2	2	2	3
Q9MIY1	NADH-ubiquinone oxidoreductase chain 4	mt-nd4	2	4.8	#DIV/0!	#DIV/0!	#DIV/0!	#DIV/0!	0	0	0	0	0	2
REV__F1QHY3		birc6	2	0.1	#DIV/0!	#DIV/0!	#DIV/0!	#DIV/0!	0	0	0	0	0	4
X1WCG6			2	5.6	2.93363	5.56716	0.998269	1.23991	2	3	3	2	3	6
A0A0F6PK88	Adenylate kinase 2, mitochondrial	ak2	3	15.3	0.487887	0.9697	1.29302	1.4592	3	3	3	3	3	10
A0A0G2KH95			3	11.6	0.846953	0.937445	1.29282	1.14506	3	3	3	3	3	8
A0A0G2KJA5			3	17.9	0.764754	1.05232	1.12978	1.13747	1	1	1	1	1	3
A0A0G2KSV9			3	3.1	#DIV/0!	#DIV/0!	#DIV/0!	#DIV/0!	0	0	0	0	0	3
A0A140LGS5			3	1.8	1.52801	1.26388	1.23965	0.984117	1	1	1	1	1	3
A0A0G2L2Q2			3	50	1.10756	0.969169	1.00597	1.07849	10	10	10	10	10	16
A0A0G2L3Z2			3	10	0.666024	0.953261	1.59038	2.29649	2	2	2	2	2	9
F1Q8V7		tapbp	3	5.8	0.385264	0.891135	0.874214	0.928341	2	1	2	2	2	4
A0A0R4I9K9		pla2g12b	3	19.5	0.375028	0.604627	1.14921	1.44888	4	4	4	4	4	12
A0A0R4IA80	Serine/threonine-protein phosphatase	ppp1cb	3	13.9	#DIV/0!	#DIV/0!	#DIV/0!	#DIV/0!	0	0	0	0	0	4
F1QBC0		plxnb2a	3	1.6	#DIV/0!	#DIV/0!	#DIV/0!	#DIV/0!	0	0	0	0	0	6
F1QH99		acp1	3	19	#DIV/0!	#DIV/0!	#DIV/0!	#DIV/0!	0	0	0	0	0	3
A0A140LGA3	Kynurenine formamidase	afmid	3	12.4	#DIV/0!	#DIV/0!	#DIV/0!	#DIV/0!	0	0	0	0	0	3
Q6PH44		bsg	3	17.1	1.7781	1.03095	1.14725	1.04659	5	5	5	5	5	6
A0A0R4IE72		try	3	15.1	0.636661	0.84354	1.16413	1.32089	1	1	1	1	1	8
A0A140TAU7	Serine/arginine-rich splicing factor 1B	srsf1a	3	22.3	#DIV/0!	#DIV/0!	#DIV/0!	#DIV/0!	0	0	0	0	0	7
A0A0R4IEP1	Protein canopy-1	cnpy1	3	19.7	0.763879	0.790185	1.07359	1.09032	3	3	3	3	3	11
E7FC21		nt5c2a	3	7.7	1.05575	0.910891	1.06177	1.17267	2	2	2	2	2	7
B0V1K8		ido1	3	8.3	#DIV/0!	#DIV/0!	#DIV/0!	#DIV/0!	0	0	0	0	0	6
Q7T3C7	Reticulon-4-interacting protein 1 homolog, mitochondrial	rtn4ip1	3	10.3	#DIV/0!	#DIV/0!	#DIV/0!	#DIV/0!	0	0	0	0	0	5
A0A0R4IFI9			3	14.6	1.06405	1.20624	1.3636	1.25718	4	5	5	5	5	11
A0A0R4IGB1			3	4.8	0.64218	1.08089	0.927249	0.900054	4	4	4	4	4	6
Q6NV46		stat3	3	4.1	0.916174	1.00528	1.07692	1.1855	1	1	1	1	1	4
Q5BJD1		rab6bb	3	16.3	#DIV/0!	#DIV/0!	#DIV/0!	#DIV/0!	0	0	0	0	0	8
A0A0R4IH79			3	4.8	#DIV/0!	#DIV/0!	#DIV/0!	#DIV/0!	0	0	0	0	0	6
Q6NYE6		cyb5r3	3	11.7	1.09505	1.14457	1.08103	1.21481	2	2	2	2	2	7
A0A0R4IIX4		cstf3	3	5	#DIV/0!	#DIV/0!	#DIV/0!	#DIV/0!	0	0	0	0	0	4
Q5RH89		cmasa	3	8.3	1.31786	1.03771	1.20403	0.909385	1	1	1	1	1	3
Q568N7		gm2a	3	16	#DIV/0!	#DIV/0!	#DIV/0!	#DIV/0!	0	0	0	0	0	5
A0A0R4IPA1			3	11.2	1.1865	2.45626	1.90181	3.18272	1	1	1	1	1	5
A0A0R4IK35			3	10	1.20316	0.744055	0.761944	0.78253	1	1	1	1	1	12
Q7ZVA6	Eukaryotic initiation factor 4A-III	eif4a3	3	7.4	#DIV/0!	#DIV/0!	#DIV/0!	#DIV/0!	0	0	0	0	0	6
F1QHE9		ndufs7	3	11.5	#DIV/0!	#DIV/0!	#DIV/0!	#DIV/0!	0	0	0	0	0	5
F1R7W8		sec23b	3	6.2	#DIV/0!	#DIV/0!	#DIV/0!	#DIV/0!	0	0	0	0	0	3
Q802D5		pfn2	3	29.3	0.898175	1.18714	1.41313	1.33939	6	6	6	6	6	11
A0A0R4IQE9			3	6.5	0.915358	1.15233	0.889155	1.10092	2	2	2	2	2	15
Q7ZYX4		cct6a	3	7	1.01105	0.898692	1.17436	1.1652	1	1	1	1	1	5
F1QCV2		hdac10	3	6.2	0.961984	1.2564	1.32671	1.70509	1	1	1	1	1	5
A0A0R4ISJ3			3	3.2	0.889948	0.8806	0.857553	0.794491	3	3	3	3	3	9
Q0P483	Mitochondrial coenzyme A transporter SLC25A42	slc25a42	3	11.5	#DIV/0!	#DIV/0!	#DIV/0!	#DIV/0!	0	0	0	0	0	3
F1QHW0		cyp20a1	3	8.2	#DIV/0!	#DIV/0!	#DIV/0!	#DIV/0!	0	0	0	0	0	4
Q4QRK0	Methionine aminopeptidase 1	metap1	3	7.3	#DIV/0!	#DIV/0!	#DIV/0!	#DIV/0!	0	0	0	0	0	6
Q7ZUY8		pacsin3	3	9.3	1.37739	1.10676	0.912214	0.917758	3	3	3	3	3	9
A0A0R4IYD0			3	38.1	0.621463	1.09483	2.6466	3.63984	6	6	6	5	6	16
A2AWE1		prdx1	3	13.6	#DIV/0!	#DIV/0!	#DIV/0!	#DIV/0!	0	0	0	0	0	4
B0S738		si:dkey-4e7.3	3	15.1	#DIV/0!	#DIV/0!	#DIV/0!	#DIV/0!	0	0	0	0	0	4
F1QNG7		npc1	3	2.4	1.16502	0.793562	0.798774	0.779758	1	1	1	1	1	6
A0A140LH20			3	12.8	1.29387	0.772237	1.15826	0.986664	3	4	3	4	4	10
A0JMQ8		zgc:154169	3	4.6	#DIV/0!	#DIV/0!	#DIV/0!	#DIV/0!	0	0	0	0	0	9
F1QG78	Phosphatidylinositide phosphatase SAC1-A	zgc:158642	3	5.3	0.375183	0.80239	1.90999	2.79	1	1	1	1	1	5
E7F8C0		ipo9	3	2.3	#DIV/0!	#DIV/0!	#DIV/0!	#DIV/0!	0	0	0	0	0	4
A3KQK2	Asparagine synthetase	asns	3	7	0.972869	0.879454	1.30102	1.20842	1	1	1	1	1	3
Q7ZWE9	UMP-CMP kinase	cmpk	3	19.9	1.15108	1.20602	1.39149	1.41504	3	3	3	3	3	12
F1QIA5		mtdha	3	8.3	0.59321	0.532185	0.665878	0.840875	3	3	3	3	3	6
Q71N41	Guanidinoacetate N-methyltransferase	gamt	3	25.2	#DIV/0!	#DIV/0!	#DIV/0!	#DIV/0!	0	0	0	0	0	5
A8E7H0		si:ch211-117n7.6	3	9.6	0.751821	1.15944	1.29581	1.21546	4	4	4	3	4	10
A8WGN9	Lipase	lipf	3	8.1	0.971694	0.95621	0.995635	1.0678	1	1	1	1	1	7
E9QJJ5	Proteasomal ubiquitin receptor ADRM1	adrm1	3	7.8	1.12828	1.03618	1.02186	1.08623	3	3	3	3	3	6
A9JRB9		phospho2	3	12.9	#DIV/0!	#DIV/0!	#DIV/0!	#DIV/0!	0	0	0	0	0	7
B0BLX4		zgc:175088	3	28.2	0.96606	0.72764	0.821074	0.800947	3	3	3	3	3	7
B0R0S5	Eukaryotic translation initiation factor 6	eif6	3	28.9	#DIV/0!	#DIV/0!	#DIV/0!	#DIV/0!	0	0	0	0	0	4
B0R1E9		zgc:92357	3	15.1	0.793102	1.06228	1.58218	1.56977	17	17	17	17	17	33
B3DGI9		timm8b	3	30.5	0.526789	0.865621	0.888281	1.06366	2	2	2	2	2	6
B3DIU1		cul3b	3	4.8	#DIV/0!	#DIV/0!	#DIV/0!	#DIV/0!	0	0	0	0	0	3
B3DK73		si:dkey-222f8.3	3	8.6	#DIV/0!	#DIV/0!	#DIV/0!	#DIV/0!	0	0	0	0	0	6
Q7T391	Annexin	anxa11a	3	4.8	#DIV/0!	#DIV/0!	#DIV/0!	#DIV/0!	0	0	0	0	0	4
B8A5M2		si:dkeyp-75b4.10	3	15.5	#DIV/0!	#DIV/0!	#DIV/0!	#DIV/0!	0	0	0	0	0	4
F6PB84		hnrpkl	3	8.6	0.675997	1.04902	1.3149	1.17797	2	1	2	2	2	5
F1QIB3		dbnlb	3	9.8	1.31103	1.06393	1.26674	1.17262	2	2	2	2	2	11
E7EZW6		srpr	3	5.2	0.67859	0.851622	1.34269	1.47092	1	1	1	1	1	6
E7F0A1		pfn1	3	24.8	#DIV/0!	#DIV/0!	#DIV/0!	#DIV/0!	0	0	0	0	0	7
E7F238		CABZ01059390.1	3	19.7	0.442029	0.856612	0.618057	0.964781	1	1	1	1	1	3
E7F408		si:ch73-334d15.1	3	4.7	#DIV/0!	#DIV/0!	#DIV/0!	#DIV/0!	0	0	0	0	0	8
E7F6F7		abcb7	3	5.9	0.817628	1.01671	1.01225	1.09297	3	3	3	3	3	5
E7F6X2		vkorc1	3	19.9	0.499278	0.879388	0.89517	0.864985	4	3	4	4	4	10
E7F6Z6		si:dkey-9l5.2	3	2.2	0.918335	1.15569	1.02749	1.1919	1	1	1	1	1	3
E7F7J1		fdx1	3	17.7	0.580938	0.948449	1.19796	1.15226	3	2	3	3	3	19
E7F9Y7		abhd10b	3	11.8	#DIV/0!	#DIV/0!	#DIV/0!	#DIV/0!	0	0	0	0	0	5
E7FDV5		LOC100330940	3	10.2	0.909201	1.01689	1.09119	1.20191	4	4	4	4	4	9
E7FE90		fetub	3	8	0.892228	0.921391	0.931375	1.02065	4	3	4	4	4	10
Q6NWG7		cd9a	3	14.5	1.31667	1.29718	1.51242	1.16314	2	2	2	2	2	9
E9QBV1		cltcb	3	3.5	0.823193	0.898967	1.42431	2.14936	3	3	3	3	3	6
E9QD12		dcxr	3	19.5	0.660727	0.990328	2.69243	2.98584	1	1	1	1	1	8
E9QDD3		ugt5d1	3	7.4	0.527786	1.06966	1.23167	1.37428	2	2	2	2	2	7
E9QGP3		phpt1	3	22.6	0.749463	0.955781	0.912798	0	1	1	1	1	0	3
F1Q7F8		rbm4.2	3	10.9	#DIV/0!	#DIV/0!	#DIV/0!	#DIV/0!	0	1	1	1	1	6
F1Q7L0		vtg4	3	2.1	0.853821	0.74088	1.65856	2.32058	4	4	4	4	4	7
F1Q9C7	E3 UFM1-protein ligase 1	ufl1	3	4.2	#DIV/0!	#DIV/0!	#DIV/0!	#DIV/0!	0	0	0	0	0	3
F1QAF6		ugt1ab	3	7	0.471631	0.617315	0.83847	1.02695	1	1	1	1	1	5
F1QAU9			3	1.8	#DIV/0!	#DIV/0!	#DIV/0!	#DIV/0!	0	0	0	0	0	3
Q803G5	Sorting and assembly machinery component 50 homolog A	samm50a	3	5.5	0.77017	0.8249	0.907584	1.11011	1	1	1	1	1	6
F1R6V6		rab14	3	20.8	0.991044	1.02292	1.10946	1.12844	1	1	1	1	1	7
F1QCD4	Aspartate aminotransferase	got2b	3	6.5	1.08786	0.938589	1.06401	1.08222	1	1	1	1	1	5
F1QDD9		gfpt1	3	8.2	1.14475	0.930063	1.04055	1.19143	2	2	2	2	2	4
F1QEB4		ssrp1a	3	4.3	1.02114	1.02866	1.1304	1.10105	1	1	1	1	1	3
F1QEJ5		uqcrq	3	29.3	0.470477	0.852079	1.74961	3.15257	1	1	1	1	1	7
Q568J8	Transmembrane protein 256	tmem256	3	32.5	#DIV/0!	#DIV/0!	#DIV/0!	#DIV/0!	0	0	0	0	0	4
F1QG80		rpl22	3	27	0.803361	0.786825	1.05113	1.13261	4	4	4	4	4	19
F1QHE5		psmd14	3	8.7	#DIV/0!	#DIV/0!	#DIV/0!	#DIV/0!	0	0	0	0	0	5
F1QJN9		cpb1	3	12.3	0.649262	0	0	1.07585	1	1	0	0	1	6
F1QKP8		rpz2	3	9.8	#DIV/0!	#DIV/0!	#DIV/0!	#DIV/0!	0	0	0	0	0	4
Q7ZTS8		elavl1	3	9	1.08295	1.23439	1.2902	1.41674	1	1	1	1	1	10
F1QPC3	Store-operated calcium entry-associated regulatory factor	tmem66	3	11	0.797317	0.905542	1.02951	1.00313	1	1	1	1	1	3
F1QPF7		cth	3	10.4	#DIV/0!	#DIV/0!	#DIV/0!	#DIV/0!	0	0	0	0	0	7
F1QQQ6		pnpo	3	18.3	0.520733	0.755945	0.899803	1.1366	2	2	2	2	2	5
F1QQZ1		sf3b1	3	2.4	#DIV/0!	#DIV/0!	#DIV/0!	#DIV/0!	0	0	0	0	0	6
F1QRM9		npepps	3	3.4	#DIV/0!	#DIV/0!	#DIV/0!	#DIV/0!	0	0	0	0	0	6
F1QTT3		jupa	3	4.5	0.99249	1.03815	1.18743	1.25668	2	2	2	2	2	3
F1QUS9	Ubiquitin carboxyl-terminal hydrolase	usp7	3	2.7	#DIV/0!	#DIV/0!	#DIV/0!	#DIV/0!	0	0	0	0	0	3
F1QWE6		LOC100330353	3	3.9	#DIV/0!	#DIV/0!	#DIV/0!	#DIV/0!	0	0	0	0	0	7
F1QWW6		dnajc11	3	6.6	#DIV/0!	#DIV/0!	#DIV/0!	#DIV/0!	0	0	0	0	0	4
F1QYT2		sqrdl	3	7.9	0.336293	1.05697	1.20169	1.44575	2	2	2	2	2	4
F1R0M4		fus	3	5.9	0.907846	0.967731	1.17471	1.20856	2	2	2	2	2	7
F1R1X9		zgc:92590	3	14.2	#DIV/0!	#DIV/0!	#DIV/0!	#DIV/0!	0	0	0	0	0	3
F1R3T3		ddx1	3	3.7	#DIV/0!	#DIV/0!	#DIV/0!	#DIV/0!	0	0	0	0	0	3
F1R2W1		dhrs13a.3	3	8.8	0.804703	1.03153	1.02906	0.981297	2	2	2	2	2	9
F1R454		ca2	3	11.5	0.875274	0.882959	0.760921	1.07352	1	1	1	1	1	4
F1R4B7	Ubiquitin carboxyl-terminal hydrolase	usp14	3	7.6	#DIV/0!	#DIV/0!	#DIV/0!	#DIV/0!	0	0	0	0	0	3
F1R5W4		glrx	3	45.7	0.862633	1.10238	1.27295	1.44288	7	8	8	8	8	10
F1R5X0	Phosphorylase	pygb	3	4.6	#DIV/0!	#DIV/0!	#DIV/0!	#DIV/0!	0	0	0	0	0	4
F1R7E6	Iodothyronine deiodinase	dio1	3	18.1	0.453574	1.6392	1.77409	1.96501	1	1	1	1	1	7
F1R826		gstt1b	3	14	#DIV/0!	#DIV/0!	#DIV/0!	#DIV/0!	0	0	0	0	0	8
F1RA32		epdl1	3	12.2	1.99595	1.07883	0.847327	0.790092	7	7	7	7	7	11
Q7SYK0	Chitinase domain-containing protein 1	chid1	3	10.5	#DIV/0!	#DIV/0!	#DIV/0!	#DIV/0!	0	0	0	0	0	5
F1RBN6		ethe1	3	12.2	#DIV/0!	#DIV/0!	#DIV/0!	#DIV/0!	0	0	0	0	0	4
Q66I08	Organic solute transporter subunit alpha	slc51a	3	8	0.984266	1.06507	1.2759	1.18674	5	5	5	5	5	14
F1RD76		zgc:103678	3	19.4	#DIV/0!	#DIV/0!	#DIV/0!	#DIV/0!	0	0	0	0	0	6
F1RD77		npm1b	3	10.3	0.457834	0.690189	1.38128	1.35672	1	1	1	1	1	3
F1REH8	Annexin	anxa13	3	10.8	0.931675	1.12224	0.939284	0.895407	1	1	1	1	1	9
F6NGD6		slc27a2b	3	5.7	0.684041	0.905162	1.31143	2.1699	1	1	1	1	1	5
Q5BJB8		ndufa9	3	12.6	#DIV/0!	#DIV/0!	#DIV/0!	#DIV/0!	0	0	0	0	0	3
Q7SZ53		crp2	3	15.3	2.51479	0.828037	1.17641	1.7241	2	2	2	2	2	5
Q1LUX9		tbxas1	3	6.2	0.561281	0.99312	0.812031	0.887772	3	3	3	3	3	8
I3ISQ0		lgals2b	3	32	0.871555	0.965343	0.999046	0.80031	4	4	4	4	4	13
Q08BL7	Glycerate kinase	glyctk	3	7.2	#DIV/0!	#DIV/0!	#DIV/0!	#DIV/0!	0	0	0	0	0	3
F8W3C3		zgc:66382	3	19.6	1.54304	1.35653	0.98782	1.23349	2	3	3	3	3	6
F8W3N3		fabp7a	3	28.6	0.440515	0.467396	1.44027	1.20087	14	14	14	14	14	27
F8W5L3		oat	3	7.7	0.970504	1.27613	1.40781	1.44243	3	3	3	3	3	6
Q66I59	Putative L-aspartate dehydrogenase	aspdh	3	17	0.857499	0.99397	1.18061	1.42492	4	4	4	4	4	11
P83571	RuvB-like 2	ruvbl2	3	7.1	0.888397	0.953119	1.44461	1.70177	1	1	1	1	1	3
Q08BS3		rbbp9	3	19.9	0.955281	1.12026	1.86708	2.30342	3	3	3	3	3	9
Q08CD8		rhebl1	3	15.2	#DIV/0!	#DIV/0!	#DIV/0!	#DIV/0!	0	0	0	0	0	3
Q0P3U4		cox5b2	3	27	0.781697	0.651744	0.819639	0.778036	2	2	2	2	3	12
Q1LVE8	Splicing factor 3B subunit 3	sf3b3	3	2.2	#DIV/0!	#DIV/0!	#DIV/0!	#DIV/0!	0	0	0	0	0	5
Q1LWX6		hsd17b8	3	14.1	0.811716	0.977495	0.998454	1.33688	2	2	2	2	2	8
Q91398	Casein kinase II subunit beta	csnk2b	3	16.3	#DIV/0!	#DIV/0!	#DIV/0!	#DIV/0!	0	0	0	0	0	6
Q1LXK4	Putative helicase mov-10-B.1	mov10b.1	3	3.8	#DIV/0!	#DIV/0!	#DIV/0!	#DIV/0!	0	0	0	0	0	6
Q1LY08		cpox	3	8	0.598842	1.01532	0.832925	1.52302	1	1	1	1	1	5
Q24JW2		lyz	3	21.9	1.32864	2.68677	1.04322	0.989087	4	4	4	4	4	8
Q32PS5	GrpE protein homolog	grpel1	3	18	#DIV/0!	#DIV/0!	#DIV/0!	#DIV/0!	0	0	0	0	0	5
Q4VBV9	Omega-amidase NIT2	nit2	3	10.8	1.04179	1.16021	1.07669	0.862606	3	3	3	3	3	5
Q561U4		zgc:112160	3	10.9	1.26942	1.00759	1.27523	1.14749	2	2	2	2	2	7
Q5D018	RNA-binding protein 8A	rbm8a	3	21.8	0.994465	1.01982	0.837902	1.13595	2	2	2	2	2	4
Q5RHR0		parp1	3	3.8	0.572172	0.93043	1.38409	1.26721	1	1	1	1	1	5
Q6NY81		ehd1a	3	6	0.905017	0.881155	1.06569	0.963722	2	2	2	2	2	7
Q5XJS3		scp2b	3	21.8	0.500805	1.12389	2.19224	2.1644	2	2	2	2	2	10
Q66HW9		ctrl	3	14.6	1.29513	0.692882	0.563935	0.52741	4	4	4	4	4	5
Q68EK8		tnpo2	3	3	0.994336	0.946132	1.09705	1.37232	1	1	1	1	1	5
Q68FN4		ppm1ba	3	6.7	0.728463	1.04948	0.802443	0.950986	1	1	1	1	1	3
Q6DEN0	Ubiquitin-fold modifier-conjugating enzyme 1	ufc1	3	16.9	#DIV/0!	#DIV/0!	#DIV/0!	#DIV/0!	0	0	0	0	0	5
Q6DGH3		sec61b	3	29.9	0.637384	0.788351	1.22348	1.37847	6	6	6	6	6	13
Q6DGV5		rab10	3	10.9	#DIV/0!	#DIV/0!	#DIV/0!	#DIV/0!	0	0	0	0	0	6
Q6DGW4		zgc:92745	3	13.1	1.03857	1.05459	0.621901	0.714865	1	1	1	1	1	4
Q6DGX4		gcshb	3	22.4	0.685713	1.35103	1.38819	2.43272	7	6	7	8	9	17
Q6DH80		lygl1	3	21.4	1.05136	1.22146	0.969659	1.0549	3	3	3	3	3	6
Q6DRC4	Eukaryotic translation initiation factor 3 subunit G	eif3g	3	12.6	0.437898	0.841608	1.37073	1.25519	3	3	3	3	3	7
Q6DRF3	Proteasome subunit beta type	psmb1	3	16	#DIV/0!	#DIV/0!	#DIV/0!	#DIV/0!	0	0	0	0	0	5
Q6NW62		khdrbs1b	3	10.5	0.783642	0.873552	0.988486	1.1177	3	2	3	3	3	5
Q6NX06		nucb2b	3	7.2	1.07872	0.959469	0.959197	1.06309	2	2	2	2	2	8
Q6NZ07	Nicalin-1	ncl1	3	6.8	#DIV/0!	#DIV/0!	#DIV/0!	#DIV/0!	0	0	0	0	0	7
Q6NZS4	tRNA-splicing ligase RtcB homolog	zgc:76871	3	5.9	#DIV/0!	#DIV/0!	#DIV/0!	#DIV/0!	0	0	0	0	0	4
Q6P3I0		heatr3	3	5.9	#DIV/0!	#DIV/0!	#DIV/0!	#DIV/0!	0	0	0	0	0	4
Q6P6E0		atp5l	3	35	0.504444	0.99286	1.02543	1.57798	6	6	6	6	6	17
Q6P980	Superoxide dismutase	sod2	3	15.6	0.765185	1.12734	0.868762	1.21632	7	7	7	7	7	12
Q6PBJ8	Peptidyl-prolyl cis-trans isomerase	fkbp1aa	3	39.8	0.624968	1.51219	2.45243	2.02691	5	5	5	5	5	9
Q6PBK3	40S ribosomal protein S28	rps28	3	46.4	0.612206	0.525446	0.945945	0.966281	4	4	4	4	4	8
Q6PBP3	Redox-regulatory protein FAM213A	fam213a	3	16.5	1.11954	0.96925	1.26895	1.0364	1	1	1	1	1	10
Q6PBV6	H/ACA ribonucleoprotein complex subunit 2-like protein	nhp2	3	30.7	#DIV/0!	#DIV/0!	#DIV/0!	#DIV/0!	0	0	0	0	0	3
Q6PBX2		sar1b	3	17.2	0.545017	0.932731	1.89636	2.59684	6	6	6	6	6	11
Q6PBX8		ndufv2	3	20.9	1.52163	0.951689	1.0391	0.486189	1	1	1	1	1	7
Q6PC12	Enolase	eno1a	3	9.3	0.65488	0.960584	0.989214	1.04797	6	6	6	6	6	15
Q6PFT7		cotl1	3	16.9	#DIV/0!	#DIV/0!	#DIV/0!	#DIV/0!	0	0	0	0	0	4
Q6PFU1		cd81	3	14	#DIV/0!	#DIV/0!	#DIV/0!	#DIV/0!	0	0	0	0	0	4
Q6PHV5		cpa5	3	6	#DIV/0!	#DIV/0!	#DIV/0!	#DIV/0!	0	0	0	0	0	4
Z4YIG5	Ras-related protein Rap-1b	rap1b	3	18.5	0.934323	0.955189	1.02339	0.957872	5	5	5	5	5	5
Q6TGY8	ER membrane protein complex subunit 2	emc2	3	12.1	#DIV/0!	#DIV/0!	#DIV/0!	#DIV/0!	0	0	0	0	0	5
Q6TH07		flot1b	3	9.9	0.954312	0	1.06112	1.57331	1	1	0	1	1	5
Q6TH20		drg2	3	9.9	0.665504	0.859001	1.00372	1.2405	3	3	3	2	3	6
Q6TNT8		gnai2a	3	7.9	#DIV/0!	#DIV/0!	#DIV/0!	#DIV/0!	0	0	0	0	0	6
Q6VN46	Myoglobin	mb	3	23.1	2.66925	0.86569	0.992865	0.979856	5	5	5	5	5	13
Q6ZM13		si:ch211-5k11.6	3	30.8	0.857523	1.0425	1.34321	1.4739	5	6	5	6	5	18
Q7SY54	Ethanolamine-phosphate phospho-lyase	etnppl	3	5.9	#DIV/0!	#DIV/0!	#DIV/0!	#DIV/0!	0	0	0	0	0	6
Q7T2C8		txnrd1	3	4.7	#DIV/0!	#DIV/0!	#DIV/0!	#DIV/0!	0	0	0	0	0	5
Q7T340		drg1	3	10.4	0.795908	0.88192	0.958091	1.03494	3	3	3	3	3	10
Q7T3G2		ywhah	3	16.7	#DIV/0!	#DIV/0!	#DIV/0!	#DIV/0!	0	0	0	0	0	3
Q7ZU67		eif4a1b	3	9.6	0.597778	0.756213	1.09819	1.34618	1	1	1	1	1	7
Q7ZU69		psmd13	3	7.1	#DIV/0!	#DIV/0!	#DIV/0!	#DIV/0!	0	0	0	0	0	6
Q7ZUD6		rtn3	3	13.6	0.740494	1.01245	0.898153	1.04626	7	7	7	7	7	12
Q7ZUG4		rab5ab	3	16.7	#DIV/0!	#DIV/0!	#DIV/0!	#DIV/0!	0	0	0	0	0	6
Q7ZUG5	40S ribosomal protein S21	rps21	3	32.1	1.54279	0.92191	2.4037	2.87598	1	1	1	1	1	5
Q7ZUZ2		actr1	3	8.5	1.20566	1.24457	2.26836	2.66276	1	1	1	1	1	4
Q7ZV23		nhp2l1b	3	24.2	0.879679	0.590185	1.11205	1.179	6	6	6	6	6	11
Q7ZV39		zgc:56235	3	10	1.20403	0.970314	1.20289	1.1975	2	2	2	2	2	6
Q7ZV50	Magnesium transporter protein 1	magt1	3	9.8	0.64917	0.857471	1.22178	1.15851	1	1	1	1	1	9
Q7ZV68	Vacuolar protein sorting-associated protein 29	vps29	3	19.2	#DIV/0!	#DIV/0!	#DIV/0!	#DIV/0!	0	0	0	0	0	6
Q7ZVJ0	Profilin	pfn2l	3	23	#DIV/0!	#DIV/0!	#DIV/0!	#DIV/0!	0	0	0	0	0	3
Q7ZVM6		tia1l	3	9.6	0.623679	0.87492	1.2481	1.37759	5	5	5	5	5	8
Q7ZWC9		agpat3	3	9.3	#DIV/0!	#DIV/0!	#DIV/0!	#DIV/0!	0	0	0	0	0	10
Q802W2	Aldehyde dehydrogenase family 9 member A1-B	aldh9a1b	3	7.5	#DIV/0!	#DIV/0!	#DIV/0!	#DIV/0!	0	0	0	0	0	4
Q803J3		rab2a	3	14.6	0.898893	0.981007	0.956408	1.1126	2	2	2	2	2	6
Q803Q7	Fructose-bisphosphate aldolase	aldoaa	3	7.1	1.2045	1.67832	1.59475	1.40541	2	2	2	2	2	6
Q90Y03		aldh1a2	3	7.3	#DIV/0!	#DIV/0!	#DIV/0!	#DIV/0!	0	0	0	0	0	8
Q98874	Enhancer of rudimentary homolog	erh	3	24	0.419933	0.702468	1.1653	1.07457	1	1	1	1	1	4
Q9MIY8	Cytochrome c oxidase subunit 1	mt-co1	3	7.6	#DIV/0!	#DIV/0!	#DIV/0!	#DIV/0!	0	0	0	0	0	3
Q9PTH5		psme1	3	18.5	0.652705	1.02991	1.01534	0.856578	4	5	5	5	3	8
Q9PUL9		mtch2	3	13.7	0.616228	1.27453	1.2212	1.12807	1	1	1	1	1	8
R4GEX4		eif3f	3	10.6	0.730954	0.839682	2.69673	6.22568	1	1	1	1	1	3
X1WC99			3	9.3	#DIV/0!	#DIV/0!	#DIV/0!	#DIV/0!	0	0	0	0	0	5
A0A0G2KZA4			4	7.2	0.987328	1.03383	1.11643	0.99083	1	1	1	1	1	8
A0A0R4ICM4			4	5.7	1.22412	0.899512	1.07884	1.04154	1	1	1	1	1	4
A0A0R4IBN6			4	10.1	0.603249	1.288	1.11719	1.28753	4	4	4	4	4	19
A0A0R4IW72		acmsd	4	14.9	0.841135	1.07979	1.26803	1.26342	3	2	3	3	3	15
A0A0R4ICC6			4	11.8	1.19848	1.04403	1.26278	1.73741	3	3	3	3	3	8
A0A0R4ICN8		syncripl	4	5.6	0.785654	0.804582	1.25442	1.20638	1	1	1	1	1	12
Q6DEH3	Calcium/calmodulin-dependent protein kinase type II delta 1 chain	camk2d1	4	11.2	0	0.958066	1.00039	1.41842	1	0	1	1	1	10
A0A0R4IDK6			4	14.5	0	0.733493	3.22157	5.2205	1	0	1	1	1	9
Q6ZM50		capza1b	4	22.4	1.0617	0.995349	1.07742	1.09723	5	5	5	5	5	13
A0A0R4IEU2		kpnb3	4	5.6	#DIV/0!	#DIV/0!	#DIV/0!	#DIV/0!	0	0	0	0	0	8
Q6IQ72		psmc1b	4	9.8	#DIV/0!	#DIV/0!	#DIV/0!	#DIV/0!	0	0	0	0	0	6
A0A0R4IFL5			4	7	#DIV/0!	#DIV/0!	#DIV/0!	#DIV/0!	0	0	0	0	0	5
A0A0R4IGQ7			4	17.1	0.287344	0.627045	1.84939	2.24397	3	2	2	3	3	18
A0A0R4IH35			4	6.2	1.08924	1.18123	1.20448	1.05049	3	3	3	3	3	8
Q5XJ54	Glutaredoxin 3	glrx3	4	13.8	#DIV/0!	#DIV/0!	#DIV/0!	#DIV/0!	0	0	0	0	0	9
A0A0R4IU05			4	6.5	#DIV/0!	#DIV/0!	#DIV/0!	#DIV/0!	0	0	0	0	0	8
F1QUQ7		psmc3	4	13.1	0.855308	1.16569	1.84151	2.22956	4	4	4	4	4	12
A0A0R4ILN2			4	12.9	1.19861	1.47992	1.46337	1.60489	2	2	2	2	2	9
A0A0R4ILW3		cpt1a	4	7.6	0.62311	0.805705	0.980068	1.23613	3	3	3	3	3	11
A0A0R4IMZ8			4	4.9	#DIV/0!	#DIV/0!	#DIV/0!	#DIV/0!	0	0	0	0	0	4
A0A0R4INQ6		cyp27a1.4	4	15.8	#DIV/0!	#DIV/0!	#DIV/0!	#DIV/0!	0	0	0	0	0	8
A0A0R4INZ8			4	10.2	0.896519	0.968305	1.00933	1.1537	2	2	2	2	2	8
B0UYA3		cryl1	4	18.4	0.990935	1.07404	1.19689	1.32737	5	5	5	5	5	15
F1Q931		larp1b	4	4	0.905634	0.669865	0.891683	0.835934	6	6	6	6	6	16
A0A0R4IPV1			4	13.6	1.2127	0.919647	0.999391	1.03275	2	2	2	2	2	6
A0A0R4IRJ2			4	16.8	1.05116	1.06902	1.07393	1.18465	2	2	2	2	2	9
A0A0R4IVT5			4	17.5	0.945833	0.684583	0.931806	0.961065	21	20	21	21	21	43
Q7ZTT8	NADH dehydrogenase [ubiquinone] 1 alpha subcomplex subunit 4	ndufa4l	4	32.9	0.456652	0.968992	1.527	1.77948	6	5	6	6	6	9
E7FD66		aass	4	5.7	0.726963	1.33758	1.49836	2.25825	3	3	3	3	3	9
A0A0R4IVS5			4	4	#DIV/0!	#DIV/0!	#DIV/0!	#DIV/0!	0	0	0	0	0	5
A3KQE8	Ribose-phosphate pyrophosphokinase	prps1a	4	12.6	0.493395	0.873811	1.22071	2.14874	2	2	2	2	2	10
A0A0R4IWP3	Proteasome subunit beta type	psmb2	4	23.6	0.475304	1.09072	1.12454	1.21363	3	3	3	3	3	10
A0A0R4IZW1		gsna	4	7	1.01683	1.19538	1.01993	1.14223	3	3	3	3	3	9
A1A605		ybx1	4	19.1	0.432775	0.464776	1.27384	1.222	13	13	13	13	13	28
A2ARG7		atp5ib	4	50.7	1.04161	0.782568	1.28019	1.20537	3	3	3	3	3	14
A2BGT2		dao.2	4	13.2	0.769429	0.736973	0.910468	1.12931	4	4	4	4	4	11
A2CEW4		atic	4	8.3	1.05215	0.848613	1.39965	1.39909	6	6	6	6	6	10
A3KPG5		crp3	4	16.6	1.53946	1.64999	1.58883	1.61884	2	2	2	2	2	13
A3KPS8		ugt5c3	4	7.9	0.537098	0.862396	1.12868	1.00334	5	5	5	5	5	15
A3KQX1		cndp2	4	9.3	#DIV/0!	#DIV/0!	#DIV/0!	#DIV/0!	0	0	0	0	0	9
A5PMS9		ap1b1	4	4.4	0.886826	0.992465	1.03647	1.36222	3	3	3	3	3	11
A5PMV7		ppp2r1a	4	6.8	#DIV/0!	#DIV/0!	#DIV/0!	#DIV/0!	0	0	0	0	0	8
A7MCI0		eif5a	4	23.7	0.756609	0.845287	1.21433	1.24183	10	10	10	10	10	13
A7YY10		zgc:171772	4	48.9	0.563754	0.84899	1.30706	1.55712	12	12	12	12	12	19
A8E5B7		ndufb5	4	21	#DIV/0!	#DIV/0!	#DIV/0!	#DIV/0!	0	0	0	0	0	5
A8E7G0		dhdhl	4	12.6	#DIV/0!	#DIV/0!	#DIV/0!	#DIV/0!	0	0	0	0	0	5
A8E7G6		prdx3	4	15.7	0.983305	0.952089	0.941606	1.00241	6	6	6	6	6	17
A8KB78		rps23	4	28.7	0.831723	0.850823	1.55046	1.95422	5	5	5	5	5	18
A8WFT4		scly	4	10	0.973583	0.941003	1.00852	1.09744	2	2	2	2	2	9
B0R1D0		psmc4	4	9.3	0.773034	1.36736	2.46232	3.02205	2	2	2	2	2	8
B0S6Z1		dhx9	4	4.4	0.901891	1.01918	1.35002	1.23519	1	1	1	1	1	10
B0UYE4	O-acyltransferase	soat1	4	8.5	0.62984	0.826278	1.51973	1.93979	2	2	2	2	2	13
Q7ZV22	S-methyl-5-thioadenosine phosphorylase	mtap	4	18.6	0.961588	1.03493	1.13295	1.26217	2	2	2	2	2	5
B3DIV6		dlat	4	6.9	1.17027	0.994103	0.789805	0.760145	1	1	1	1	1	9
B3DKJ0		cct7	4	6.6	#DIV/0!	#DIV/0!	#DIV/0!	#DIV/0!	0	0	0	0	0	6
F6P8R2	Oxysterol-binding protein	osbp	4	5.7	0.947305	1.43376	2.04735	2.01088	1	1	1	1	1	5
B8A565		c9	4	5.6	1.12219	1.47272	1.04705	1.08306	3	3	3	3	3	6
B8A5D4		txnl1	4	21.1	1.30129	0.970436	1.35483	1.22723	7	7	7	7	7	10
B8A5D9		zgc:112210	4	17.8	0.879098	1.07363	1.11551	1.22169	6	6	6	6	6	10
B8JHU4		actn1	4	4.8	0.876184	1.22025	1.2972	1.35232	3	3	3	3	3	14
B8JK19		sftpbb	4	12.3	1.77434	1.03151	1.01546	0.828489	2	2	2	2	2	13
B8JL30		hmgb2a	4	20.1	0.356259	1.28044	1.42477	1.52896	6	5	5	6	6	15
B8JL82		ssr3	4	17.7	0.778252	0.696413	1.02871	1.08742	13	13	13	12	12	23
B8JMA8		ugt2a4	4	6.4	0.441505	0.519063	0.701189	0.82574	2	2	2	2	2	11
E7EY26		hsd3b7	4	13.6	0.865686	1.15545	1.14983	1.34699	1	1	1	1	1	7
F1QG53		ugt2b1	4	8	0.756737	0.933698	1.28463	0.954719	2	2	2	2	2	8
E7F071		FP085405.1	4	5	0.84912	1.22788	1.48622	1.62276	3	3	3	3	3	9
E7F3A5		wu:fb66f03	4	12.3	1.63447	1.06928	0.845112	0.669845	7	7	7	7	7	15
Q6NUY9		mapre1b	4	13.6	#DIV/0!	#DIV/0!	#DIV/0!	#DIV/0!	0	0	0	0	0	4
E7F6B5		ipo7	4	6.2	#DIV/0!	#DIV/0!	#DIV/0!	#DIV/0!	0	0	0	0	0	10
E9QFU6		LOC100333275	4	18.6	0.473533	1.04597	1.28152	1.01668	3	3	3	3	3	11
E7F8T6		LOC100330160	4	9.7	0.753044	0.984927	1.02859	1.1753	2	2	2	2	2	7
E7FA31		zgc:55262	4	7	#DIV/0!	#DIV/0!	#DIV/0!	#DIV/0!	0	0	0	0	0	5
E7FCS1		LOC798210	4	11	#DIV/0!	#DIV/0!	#DIV/0!	#DIV/0!	0	0	0	0	0	9
E7FCV8		col6a2	4	5.4	1.25997	0.926268	0.440311	0.392074	1	1	1	1	1	5
E7FDY7	Glucose-6-phosphate 1-dehydrogenase	g6pd	4	9	1.03283	1.43757	1.11848	1.39438	4	4	4	4	4	11
E7FEI0		cyp7c1	4	7.7	#DIV/0!	#DIV/0!	#DIV/0!	#DIV/0!	0	0	0	0	0	6
E9QFX0		apoc1l	4	40.5	0.711981	0.875031	1.49414	1.13824	10	10	10	10	10	19
E9QF69	60S ribosomal protein L18	rpl18	4	25.6	0.76045	0.753614	1.17568	1.54271	10	10	10	11	11	38
E9QF97	Protein transport protein Sec31A	sec31a	4	2.6	#DIV/0!	#DIV/0!	#DIV/0!	#DIV/0!	0	0	0	0	0	6
E9QHX8		ssr4	4	31.4	0.638315	0.94039	2.16374	2.48768	4	4	4	4	4	24
E9QI07		clta	4	23.4	1.25862	0.823751	0.80772	1.17511	4	4	4	2	4	8
E9QI36		hars	4	7.6	#DIV/0!	#DIV/0!	#DIV/0!	#DIV/0!	0	0	0	0	0	10
F1Q4Q4		lmf2b	4	6.3	#DIV/0!	#DIV/0!	#DIV/0!	#DIV/0!	0	0	0	0	0	11
F1Q4X1		col6a3	4	1.3	0.949325	1.00897	1.0441	0.97086	1	1	1	1	1	7
F1Q9K6	Sulfurtransferase	zgc:162544	4	11.7	1.15161	1.30674	0.896161	1.02602	3	3	3	3	3	15
F1Q9N0		si:ch211-235o23.2	4	21.7	1.77725	1.15551	0.80763	0.959601	5	5	5	5	5	21
F1QCH7		zgc:162816	4	12	0.800855	1.29345	1.33902	1.63571	7	7	7	7	7	14
F1QEB3			4	29.6	1.18617	1.01444	0.926026	0.97487	2	3	2	4	3	14
Q7SXW6	Actin-related protein 2-A	actr2a	4	10.7	1.63458	0.679019	0.279834	0.241275	1	1	1	1	1	4
F1QFX9		ctrb1	4	16	1.4817	0.892476	0.633766	0.772733	7	7	7	6	7	16
Q567V6	Eukaryotic translation initiation factor 3 subunit K	eif3k	4	24.2	1.08372	1.00066	1.39254	1.14138	1	1	1	2	1	12
F1QPA8		sult3st1	4	15.4	0.71589	0.914952	2.53582	2.53796	1	1	1	1	1	5
F1QS38		ddb1	4	7.3	#DIV/0!	#DIV/0!	#DIV/0!	#DIV/0!	0	0	0	0	0	7
F1QSB3		srprb	4	16.9	0.708613	0.913268	1.14511	1.67147	6	6	6	6	6	9
F1QTF0		hmgcl	4	10.6	#DIV/0!	#DIV/0!	#DIV/0!	#DIV/0!	0	0	0	0	0	6
F1QUG3		ugt1b4	4	9.1	0.745099	1.06986	1.55195	1.45068	6	6	6	6	6	10
F1QWK0		zgc:103601	4	17	0.617535	0.871651	1.27282	1.63579	5	5	5	5	5	14
F1QWR0		nipsnap3	4	19.9	1.13994	1.96399	1.87412	2.42642	1	1	1	1	1	6
F1QX19		zmpste24	4	7.7	#DIV/0!	#DIV/0!	#DIV/0!	#DIV/0!	0	0	0	0	0	5
F1QY27		h1fx	4	18.8	#DIV/0!	#DIV/0!	#DIV/0!	#DIV/0!	0	0	0	0	0	4
F1QZV8		si:dkey-265e15.5	4	5.4	0.694192	1.15091	1.23027	1.26431	3	3	3	3	3	8
F1R1P6		nans	4	12	1.20529	0.955779	0.804744	1.13527	5	6	5	5	6	11
F1R2S5		vtg5	4	3.5	1.84794	0.65205	1.276	1.0927	4	4	3	4	4	9
F1R3F7		si:ch1073-329n19.2	4	21.5	1.23367	1.33521	1.73959	1.84614	4	4	4	4	4	14
F1R3V8	Coiled-coil domain-containing protein 47	ccdc47	4	10.9	0.913331	1.24357	1.60145	2.2642	1	1	1	1	1	10
F1R4J4	Acyl-coenzyme A oxidase	acoxl	4	6.5	#DIV/0!	#DIV/0!	#DIV/0!	#DIV/0!	0	0	0	0	0	7
F1R8L3		rpz5	4	10.7	#DIV/0!	#DIV/0!	#DIV/0!	#DIV/0!	0	0	0	0	0	5
F1R8U1		mospd2	4	7.6	0.995771	1.0617	1.26546	1.13117	1	1	1	1	1	5
F1R9B4		bdh1	4	11	#DIV/0!	#DIV/0!	#DIV/0!	#DIV/0!	0	0	0	0	0	5
Q1LUZ9		ces3	4	7.8	1.01516	1.2908	1.12485	1.02593	2	2	2	2	2	9
Q0P3Z2	Phosphotriesterase-related protein	pter	4	11.5	1.00072	1.04342	1.0757	1.10912	2	2	2	2	2	7
F1RCK7		rbks	4	13.5	0.83456	0.942084	1.01078	1.03853	3	3	3	3	3	11
F1RDX1		auh	4	12.9	1.0025	1.19825	1.15358	1.16486	2	2	2	2	2	7
F5H8N4		lrpprc	4	2.5	0.798158	0.899189	1.34112	1.59447	1	1	1	1	1	5
F6NHB2			4	13.9	0.888698	0.999484	1.01071	0.975732	6	6	6	6	6	9
Q641M4		zgc:100918	4	19.5	0.704289	1.26209	1.47868	1.50711	1	1	1	1	1	7
Q6NWJ2		spcs3	4	24.4	0.579768	0.802265	1.32784	1.39373	6	6	6	6	6	19
F8W3C5	Phytanoyl-CoA dioxygenase domain-containing protein 1	phyhd1	4	18.4	#DIV/0!	#DIV/0!	#DIV/0!	#DIV/0!	0	0	0	0	0	12
F8W4C4	Ubiquitin carboxyl-terminal hydrolase	usp5	4	9.4	0.862819	1.09523	1.3111	1.47799	3	3	2	2	2	6
P79735	GTP-binding nuclear protein Ran	ran	4	20.9	0.664198	0.974346	1.58722	1.7293	5	5	5	5	5	13
Q0P4B4		tagln	4	21.1	0.660116	1.2358	2.06338	1.25125	1	1	1	1	1	9
Q1LYB6	ATPase inhibitor B, mitochondrial	atpif1b	4	33.6	0.870216	0.914107	1.08483	1.10047	2	2	2	2	2	5
Q1LYQ0		zgc:162396	4	14.4	#DIV/0!	#DIV/0!	#DIV/0!	#DIV/0!	0	0	0	0	0	6
Q4V8S5		acbd7	4	42	#DIV/0!	#DIV/0!	#DIV/0!	#DIV/0!	0	0	0	0	0	14
Q4V918	Proteasome subunit alpha type	psma3	4	17.6	0.876871	0.960912	1.1438	0.968587	2	2	2	2	2	5
Q4VBI5	NADH dehydrogenase [ubiquinone] 1 alpha subcomplex subunit 2	ndufa2	4	42.6	0.678678	0.806866	0.806431	0.98195	1	1	1	1	1	8
Q4VBU7		cox5aa	4	22.7	0.755611	0.836628	1.14972	1.41885	4	4	4	4	4	14
Q5PR44		sat2a	4	20.5	#DIV/0!	#DIV/0!	#DIV/0!	#DIV/0!	0	0	0	0	0	5
Q5PR98	Protein NDRG2	ndrg2	4	11.7	1.00628	1.42658	1.85923	2.18736	1	1	1	1	1	12
Q5RHZ6		osgep	4	10.1	#DIV/0!	#DIV/0!	#DIV/0!	#DIV/0!	0	0	0	0	0	5
Q5RI57		si:ch211-240l19.8	4	41.8	1.21895	0.634306	0.483806	0.431382	1	1	1	1	1	6
Q5SPA1		hebp2	4	19.5	0.476807	0.94991	0.955676	1.13672	4	4	4	4	4	6
Q5SPG8		si:dkey-11e23.4	4	8.9	0.622512	1.09679	1.3571	1.55224	1	1	1	1	1	5
Q5TYP3		si:dkey-51e6.1	4	33	0.753895	0.980651	1.26694	1.21576	3	3	3	3	3	7
Q5TZ76		cyp2p6	4	5.6	0.416201	0.823005	0.820338	0.815114	6	6	6	6	6	11
Q5TZ82		cyp2n13	4	7.4	0.488994	1.11025	1.10862	1.36017	1	1	1	1	1	10
Q66I42		msna	4	7.1	#DIV/0!	#DIV/0!	#DIV/0!	#DIV/0!	0	0	0	0	0	5
Q6DGL9		rpl38	4	45.7	1.01027	1.45505	2.43463	3.64158	3	4	4	4	4	23
Q6DGM0		rpl35a	4	27.3	0.749548	0.840791	1.21772	1.36591	8	8	8	8	8	17
Q6DGP6		sub1b	4	38.7	0.881835	0.983353	1.06915	1.01266	5	5	5	5	5	21
Q7T2E8		rhoac	4	15.5	0.857533	0.888013	0.85207	0.877987	3	3	3	2	3	10
Q6DHH8		sult1st6	4	19.2	#DIV/0!	#DIV/0!	#DIV/0!	#DIV/0!	0	0	0	0	0	9
Q6DHP7		gbp1	4	6.4	#DIV/0!	#DIV/0!	#DIV/0!	#DIV/0!	0	0	0	0	0	6
Q6DHQ3	Aspartoacylase-2B	acy3.2	4	16.2	0.794949	1.00108	1.10722	1.16026	5	5	5	5	5	12
Q6IQE5	ATPase asna1	asna1	4	10.3	#DIV/0!	#DIV/0!	#DIV/0!	#DIV/0!	0	0	0	0	0	4
Q6IQM2	Cytochrome c	cyc	4	39.4	0.38591	0.851331	1.30618	2.3933	2	2	2	2	2	8
Q6JIZ2		pura	4	18.1	0.970611	0.677126	0.674366	0.70136	3	2	2	2	3	7
Q6NWC1		vdac1	4	14.1	1.38202	0.687173	0.711292	0.62037	1	1	1	1	1	5
Q6NWI7		tmed10	4	21.1	1.25865	0.795043	0.934044	0.866458	9	9	9	9	9	19
Q6NWK3		ranbp1	4	22.7	0.305152	0.574923	1.2159	1.10553	4	3	4	4	4	11
Q6NX98		st13	4	14.4	0.590079	1.30357	1.7054	1.76426	2	2	2	3	3	7
Q6NZU0		hspa4b	4	5	0.790583	1.07196	1.3518	1.35843	1	1	1	1	1	4
Q6P026	Barrier-to-autointegration factor	banf1	4	46.7	0.81905	0.938517	1.12615	0.816001	1	1	1	1	1	11
Q6P5K6		slc25a20	4	12.7	0.607673	0.940007	1.14166	1.12576	7	7	7	7	7	16
Q7ZUW4		arf5	4	23.9	0.880366	0.885145	0.954965	0.910578	1	1	1	1	1	6
Q6PBJ9		rplp2	4	44.3	0.85333	0.44226	0.743084	0.745448	10	10	10	10	10	32
Q6PBW3		rps14	4	36.4	0.840872	0.743451	1.14187	1.31414	7	6	6	6	7	20
Q6PC22		ndufa8	4	34.3	#DIV/0!	#DIV/0!	#DIV/0!	#DIV/0!	0	0	0	0	0	8
Q6PEH5	Ubiquitin-conjugating enzyme E2 variant 2	ube2v2	4	33.1	0.901893	0.779897	1.29329	1.20379	7	7	7	7	6	15
Q6PH46	T-complex protein 1 subunit delta	cct4	4	8.3	1.33665	0.788092	0.867222	0.830545	1	1	1	1	1	6
Q6PH75		ctsba	4	16.7	1.52965	0.696786	1.03531	0.715313	7	7	7	7	7	14
Q6PUF3	Hydroxysteroid 11-beta-dehydrogenase 1-like protein	hsd11b1l	4	16.7	0.512381	0.785021	0.670963	1.32541	6	6	6	6	6	12
Q6Q415	60S ribosomal protein L36	rpl36	4	30.5	0.430909	0.810923	3.0172	7.41956	1	1	1	1	1	14
Q6TGT9		srsf5a	4	12	#DIV/0!	#DIV/0!	#DIV/0!	#DIV/0!	0	0	0	0	0	7
Q6TH32		cfl1	4	24.8	0.558953	0.970069	1.69692	1.79417	11	11	10	11	10	24
Q6ZM23		cox6c	4	35.5	0.565795	1.10423	2.17234	2.77234	5	5	5	5	5	19
Q7SXM1		cox6b2	4	53.5	0.571274	0.651719	0.434895	1.04761	6	6	6	6	6	15
Q7SXN2		hnrpdl	4	14.9	0.420206	1.15732	1.63928	2.1166	1	1	1	1	1	9
Q7ZV77	Proteasome subunit alpha type	psma4	4	13.8	0.83426	1.0294	1.06612	1.01722	6	6	6	6	6	11
Q7ZW09		hnrpl	4	7.6	0.599963	1.04141	1.27717	1.31636	2	2	2	2	2	7
Q7ZW75		tmed2	4	21.4	1.16917	0.892699	0.959246	0.910855	10	10	10	10	10	16
Q7ZZA3	Peptidyl-prolyl cis-trans isomerase	fkbp11	4	18.8	0.760539	0.601711	0.873873	0.9306	6	6	6	6	6	24
Q8AW07		psmd12	4	9.2	0.621235	0.843584	1.09649	1.3391	3	2	3	3	3	10
Q8JGR8		scarb2	4	12.4	#DIV/0!	#DIV/0!	#DIV/0!	#DIV/0!	0	0	0	0	0	8
Q9PUC4		psme2	4	16	0.888388	0.999228	0.914259	0.805887	5	5	5	5	5	12
Q9PVK4	L-lactate dehydrogenase B-A chain	ldhba	4	15.6	1.00409	0.922359	0.924861	0.864066	3	3	3	3	3	16
A0A0G2KQU1			5	12.1	0.894389	1.03922	1.23516	1.22393	2	2	2	2	2	9
A0A0R4IA30			5	18.8	0.376206	0.717062	1.01877	1.14104	4	4	4	4	4	15
A0A0R4IQ57		nop58	5	11	0.732533	0.709105	1.16663	1.15802	5	5	5	5	5	16
F8W5J3		hm:zeh0351	5	15.2	1.05052	1.02344	1.05875	0.885991	3	3	3	3	3	11
Q6A3P5		ndrg1a	5	19.4	0.892693	0.914583	1.5571	1.70941	5	4	4	4	4	14
A0A0R4IXL8			5	2.3	0.72056	1.27833	1.14003	1.35939	1	1	1	1	1	7
A0A0R4IT72			5	6.4	0.943883	1.38629	0.823539	0.959468	5	4	5	5	5	9
F1R0C2		si:ch211-127i16.2	5	10.4	0.611919	0.733724	0.549832	1.13303	5	5	5	5	5	9
A0A0R4IFF2			5	6.7	#DIV/0!	#DIV/0!	#DIV/0!	#DIV/0!	0	0	0	0	0	7
Q7ZVT2	Pyruvate kinase	pkma	5	10.5	1.2034	1.08063	1.6183	2.2313	1	1	1	1	1	8
A0A0R4IH71			5	13.4	0.807945	0.963619	1.169	1.27777	5	5	5	5	5	16
A0A0R4IIZ7		zgc:77052	5	21.5	0.560032	1.23979	1.50361	1.76621	5	5	5	5	5	21
A9C3Q7	Aminomethyltransferase	amt	5	14.7	0.88362	1.26139	1.23645	1.70896	4	4	4	4	4	20
Q7T2V2	Cytosolic sulfotransferase 3	sult1st3	5	20.9	0.722136	1.2185	1.72299	1.50744	3	3	3	3	3	11
Q6PBQ4		rtn1a	5	23.6	0.48116	0.565907	0.951122	1.06673	17	17	17	17	17	31
F1R3Q3		2017-09-06	5	13.9	0.642125	1.02698	1.26807	1.38187	3	3	3	3	3	10
A0A0R4IRL4			5	9.6	0.800635	0.851738	0.932959	0.814928	1	1	1	1	1	11
A2CE73		khdrbs1a	5	9.5	0.833929	1.03862	1.15852	1.15841	6	6	6	6	6	11
A0A0R4IT32		sult2st1	5	13.9	0.973945	0.794754	1.1496	1.02385	1	1	1	1	1	8
F1R9P3	Tetratricopeptide repeat protein 38	ttc38	5	13.8	0.613991	0.961923	1.36029	1.26635	2	2	2	2	2	11
Q7SX99	Fumarate hydratase, mitochondrial	fh	5	11.2	1.07156	1.07903	1.47948	2.04786	5	5	5	5	5	13
Q4QRF4	Histone H3.2	zgc:173552	5	28.7	0.922037	1.29784	1.30635	1.17251	12	12	12	12	12	23
A0A0R4IZ60		zgc:136493	5	21	0.763335	1.09811	1.1858	1.3227	4	4	4	4	4	13
A0A140LGE1			5	13.1	0.868681	0.92116	0.837656	0.91126	4	4	4	4	4	14
A5WVL6		ctsl1a	5	24.9	1.53144	1.05573	0.8909	0.939406	2	6	4	4	4	12
A7MCL7		MGC174082	5	51	1.36106	0.831004	0.952719	0.833668	2	2	2	2	2	11
A7MCR1	Cytochrome b-c1 complex subunit Rieske, mitochondrial	uqcrfs1	5	17.2	0.774878	1.05167	0.89327	1.01736	1	1	1	1	1	9
A8E5I2		zgc:77517	5	12.3	#DIV/0!	#DIV/0!	#DIV/0!	#DIV/0!	0	0	0	0	0	7
A8WGS0		cyb5a	5	49.6	0.758786	0.743677	1.32119	1.25875	7	7	6	7	6	20
A9JSU3	Fatty acid desaturase 2	fads2	5	11.9	0.577235	0.653259	1.15107	1.54488	1	1	1	1	1	11
F1QH80	Peptidyl-prolyl cis-trans isomerase	fkbp2	5	37.3	0.661681	0.691219	1.58	1.38526	3	3	2	3	3	12
B0UYS4		dera	5	22.3	0.583721	1.10759	1.34363	2.13383	2	1	2	2	2	11
Q6PI52	Calmodulin	calm1a	5	34.2	0.840852	0.566887	0.958673	0.798709	7	7	7	8	7	23
E9QB42	Acidic leucine-rich nuclear phosphoprotein 32 family member A	anp32a	5	26.3	0.870944	0.843276	1.22028	1.38165	6	6	6	6	6	14
B8A5M6		pdia2	5	10.3	#DIV/0!	#DIV/0!	#DIV/0!	#DIV/0!	0	0	0	0	0	11
B8JI00		suclg1	5	18.2	0.741708	1.40842	1.50208	1.7973	14	14	14	14	14	24
B8JI17		psap	5	13.1	1.40107	0.525525	0.552609	0.484041	6	7	6	6	5	20
B8JLJ3		ywhaz	5	18.9	0.97978	0.845706	0.931423	0.896748	3	3	3	3	3	10
B8JM34	ATP synthase-coupling factor 6, mitochondrial	atp5j	5	42.2	1.19469	0.647734	0.924398	0.790672	6	6	6	6	6	16
E9QCF1		blvrb	5	30.2	0.631628	0.953696	1.23071	1.59465	2	2	2	2	2	15
E7EY13	Choline dehydrogenase	chdh	5	13	#DIV/0!	#DIV/0!	#DIV/0!	#DIV/0!	0	0	0	0	0	5
E7EZE2		si:dkey-239i15.3	5	5.7	0.524634	1.05793	1.19144	1.57557	3	3	3	3	3	13
E7F881		abhd6a	5	24.8	0.32898	0.567155	1.23891	1.23434	1	1	1	1	1	11
E7F9F1		larsa	5	14.3	0.833845	0.781594	1.03899	1.21736	3	3	3	3	3	10
E7FAQ8		zgc:66127	5	12.6	0.347978	0.912945	1.23084	1.30975	1	1	1	1	1	11
E7FCW2		LOC100333777	5	27	0.740311	0.787254	1.10304	1.21133	4	4	4	4	4	14
E7FH67		si:ch73-244f7.4	5	4.6	#DIV/0!	#DIV/0!	#DIV/0!	#DIV/0!	0	0	0	0	0	10
E9QCY4		nupr1	5	70.7	0.567587	0.809728	1.58167	2.17245	5	4	6	6	6	11
Q6TNS5		MLC3SM	5	30.5	1.38562	0.975663	1.15771	1.13436	8	8	8	8	8	23
F1Q5Q3		serbp1a	5	13.5	0.609162	0.968466	1.90336	2.22009	2	2	2	2	2	13
F1Q6L1		fahd1	5	23.3	0.873083	1.15174	1.04711	1.1806	5	5	5	5	5	12
F1Q6S1		npepl1	5	11.2	1.31492	1.01024	1.10473	0.968038	6	6	6	6	6	15
F1Q8H6		ech1	5	14.6	0.754379	0.969371	1.26779	1.38262	7	7	7	7	7	13
F1Q9I7		snx1a	5	7.7	1.08822	1.13723	1.05565	1.22784	1	1	1	1	1	8
F1QCD8		hao2	5	16	1.26067	1.27226	1.64371	1.69357	4	4	4	4	4	13
F1QEL0		tmem214	5	7.1	0.839107	0.856844	1.74701	1.9131	1	1	1	1	1	11
F1QGI2		sec63	5	6.4	#DIV/0!	#DIV/0!	#DIV/0!	#DIV/0!	0	0	0	0	0	7
F1QHJ1		rps26l	5	45.2	0.588121	1.03219	2.44046	3.34956	3	3	3	3	3	19
F1QPL7		pcca	5	8.7	#DIV/0!	#DIV/0!	#DIV/0!	#DIV/0!	0	0	0	0	0	15
F1QPT5		si:dkey-96f10.1	5	10.3	1.38241	1.2894	1.24739	1.24293	1	1	1	1	1	12
F1QRW4		pitpnb	5	22.8	0.707544	0.763182	0.997717	0.986704	1	1	1	1	1	8
Q9I8V1		actc1b	5	15.6	0.827643	0.948664	2.16893	1.89376	17	17	16	18	18	34
F1QYZ6	Pyruvate carboxylase	pc	5	4.6	1.20467	1.53087	1.0183	1.65906	1	1	1	1	1	7
F1QZU7		aldh2.2	5	13	0.712379	1.34386	1.52917	1.78821	19	19	20	21	20	44
F1R3I6		setb	5	21.8	1.02805	1.04503	1.32249	1.3232	11	11	10	11	10	34
F1RAM4		zgc:110339	5	20	0.591384	1.42422	0.959882	1.12197	5	5	5	5	5	24
F1RB36		hacl1	5	10.2	0.764654	1.04937	1.04104	1.18462	2	2	2	2	2	10
F1RB68		zgc:103559	5	9.8	0.751645	0.985763	0.977899	0.9816	4	4	4	4	4	15
F8W4Q1		dspa	5	2	#DIV/0!	#DIV/0!	#DIV/0!	#DIV/0!	0	0	0	0	0	7
I3ISJ2	Cytochrome b-c1 complex subunit 6	uqcrh	5	52.8	1.31014	0.796735	1.24381	1.83361	4	4	4	5	5	15
F6P3G4	26S proteasome non-ATPase regulatory subunit 11A	psmd11a	5	13.3	1.26263	1.16098	1.07568	1.06383	4	4	4	4	4	9
F8W5T8		zgc:152945	5	16.3	0.463194	3.50852	3.38486	4.74273	2	1	3	2	3	9
P61485	60S ribosomal protein L36a	rpl36a	5	26.4	0.746087	0.899143	1.54617	1.52304	5	5	5	5	5	16
P62084	40S ribosomal protein S7	rps7	5	21.6	0.797053	0.840648	1.36807	1.37817	8	8	8	8	8	17
Q05AJ2		mettl7a	5	24	0.356637	0.816988	0.684883	1.01222	7	7	7	7	6	22
Q7ZSY6	Metallothionein-2	mt2	5	85	0.263806	0.334319	0.678336	0.552348	14	13	13	13	14	18
Q1LVK8		sec11a	5	20.1	0.990126	0.926124	1.26329	1.07622	2	2	2	2	2	8
Q5U3E1		rab11a	5	19.5	0.852052	0.988969	1.11001	1.00352	1	1	1	1	1	8
Q1RLT0	S-adenosylmethionine synthase	mat2al	5	16.9	0.615834	0.965999	1.40076	1.66178	6	6	4	6	6	14
Q24JV1		rpl32	5	34.1	0.785053	0.793072	1.539	2.11121	7	6	7	7	7	17
Q4KMD5		lpgat1	5	20.5	0.53559	0.83308	1.39692	1.28359	4	4	4	4	4	13
Q4VBU0		bckdha	5	13.2	#DIV/0!	#DIV/0!	#DIV/0!	#DIV/0!	0	0	0	0	0	6
Q561X2		tmed9	5	21.1	1.03346	0.891556	1.05399	1.35237	9	8	9	9	9	17
Q58EB0		zgc:110843	5	44.6	0.939602	0.820544	1.00617	0.837836	4	4	4	4	4	14
Q5I0F6		prkar1aa	5	14.2	0.716542	0.944783	1.23428	1.24636	1	1	1	1	1	9
Q5XJS8		hsd17b10	5	21.5	0.870735	1.22706	1.50216	1.41542	4	4	4	4	4	16
Q642J0		hint1	5	56.3	0.524331	0.939857	1.33491	1.5341	5	3	4	4	5	12
Q6AXI7		acads	5	12.8	1.17451	1.21541	1.09306	1.29665	1	1	1	1	1	12
Q6AXJ2	Eukaryotic translation initiation factor 3 subunit H-A	eif3ha	5	19.7	0.621477	0.864594	1.03906	0.98717	2	2	2	2	2	6
Q6DGU9		zgc:92763	5	24.9	0.781121	1.11417	1.50749	1.76633	6	6	6	6	6	22
Q6DH63		cox6b1	5	57	0.915943	0.604555	0.748199	0.877383	8	8	8	8	8	21
Q6DHN1		zgc:92203	5	10.1	0.510231	0.638613	0.904875	0.757816	2	2	2	2	2	9
Q6DRD2		psmc6	5	15.7	0.63366	1.51736	3.15361	3.85203	1	1	1	1	1	6
Q6IQA7		hm13	5	13.7	0.389599	0.644939	0.735362	1.24854	1	1	1	1	1	11
Q6IQI6		rpl11	5	28.7	0.717184	0.780477	1.19608	1.30341	12	12	12	12	12	26
Q6NYV3		h1f0	5	23.1	0.59863	0.831833	1.49286	1.48283	7	7	7	7	7	13
Q6P2T5		arpc2	5	16.4	1.4296	1.34514	0.916042	0.82689	1	1	1	1	1	13
Q6P603	Annexin	anxa2a	5	17.5	0.95004	1.51888	1.15852	1.12958	2	2	2	2	2	8
Q6P6F0		rps17	5	35.1	0.906678	0.888617	1.31668	1.35623	8	7	7	8	8	20
Q6PBI6		pcbd1	5	51	0.624795	0.720312	1.11216	1.13387	3	3	3	3	3	11
Q6PC53	Peptidyl-prolyl cis-trans isomerase	ppiab	5	28.7	0.879087	0.991895	1.13922	1.02564	16	15	16	17	17	36
Q6PFU4		cdc42	5	27.7	1.26681	1.07992	1.06833	1.15078	1	1	1	1	1	8
Q803H5	Guanine nucleotide-binding protein G(I)/G(S)/G(T) subunit beta-1	gnb1b	5	17.4	1.42429	1.04515	1.07871	1.08126	7	7	7	7	7	17
Q6PH71		asah1b	5	9.6	#DIV/0!	#DIV/0!	#DIV/0!	#DIV/0!	0	0	0	0	0	6
Q6PHJ8		myl12.1	5	39.5	1.67229	0.779596	0.94556	1.13953	3	4	4	4	3	16
Q6ZM12		OTTDARP00000002003	5	36.7	1.07582	1.19053	1.25563	1.88525	9	9	9	9	9	33
Q7SXA3		rps27a	5	42.3	0.864358	0.760342	0.955246	0.941861	9	9	10	10	10	24
Q7SXP1		capzb	5	19.4	1.01119	1.01838	1.05394	1.10876	2	2	2	2	2	10
Q7SYD0		cbr1	5	19.9	0.75838	0.950089	1.0538	1.09252	5	5	5	5	5	11
Q7T356	14-3-3 protein beta/alpha-B	ywhabb	5	24.8	1.02411	0.834125	1.09827	1.04225	6	7	7	7	7	17
Q7T358		gspt1l	5	8.3	0.413341	0.680939	0.962769	0.927128	2	2	2	2	2	9
Q7T390		tecrb	5	14.6	0.569217	0.89776	1.24461	1.1089	7	6	7	7	7	24
Q7T3B0	Eukaryotic translation initiation factor 3 subunit M	eif3m	5	13.3	#DIV/0!	#DIV/0!	#DIV/0!	#DIV/0!	0	0	0	0	0	9
Q7ZUG6		rpl30	5	50.4	0.558432	0.693793	1.02702	1.70495	10	10	10	10	10	20
Q7ZVN5		srp54	5	12.3	0.682623	0.762426	1.14614	1.16998	3	3	3	3	3	11
Q803J2		ube2na	5	36.4	0.944597	0.962639	1.51661	1.59095	1	1	1	1	1	10
Q803M1		tpm3	5	18.1	1.35626	1.09887	1.13448	1.01042	3	3	3	3	3	12
Q803M8		ywhaqb	5	29.8	1.00859	0.961759	1.09002	0.915344	4	4	4	4	4	10
Q8JHJ1	60S ribosomal protein L35	rpl35	5	31.7	0.739977	0.815652	1.0012	1.24944	13	13	13	13	13	21
Q90ZZ8	Aldehyde dehydrogenase	aldh3a2a	5	11.5	#DIV/0!	#DIV/0!	#DIV/0!	#DIV/0!	0	0	0	0	0	7
Q92051	Carbonic anhydrase	cahz	5	22.7	1.15333	0.934927	1.09606	1.12782	6	6	6	6	6	14
A0A0J9YIW4	Trans-1,2-dihydrobenzene-1,2-diol dehydrogenase	dhdh	6	19.7	0.8271	0.907438	0.924159	1.07442	3	3	3	3	3	11
A0A0R4IAL5			6	22.6	1.14706	0.873348	0.900005	0.731196	4	4	4	4	4	14
Q08BF2		slc27a1b	6	12.8	0.929737	1.18088	1.52932	1.52468	7	7	7	7	7	16
A0A0R4IZC7			6	5.2	1.21609	1.02243	1.08041	1.09934	3	3	3	3	3	12
A0A0R4IBQ0		ctsd	6	20.4	1.80745	1.23666	1.09369	1.10248	4	4	4	4	4	17
Q6NV37		gyg1a	6	19.8	0.710648	1.01621	1.33073	1.89625	2	2	2	2	2	14
F1QGG3		nsfb	6	7.6	0.851968	1.00112	1.08083	1.0961	2	2	2	2	2	8
B0S5M5		lss	6	9.7	#DIV/0!	#DIV/0!	#DIV/0!	#DIV/0!	0	0	0	0	0	8
F1QPT1		uroc1	6	10.7	1.08659	1.11243	1.09889	1.25694	11	11	11	11	11	21
I3IT87	AP-2 complex subunit mu-B	ap2m1b	6	16.6	0.626882	0.807915	0.728927	1.41342	2	2	2	2	2	14
Q7ZWJ7	60S ribosomal protein L34	rpl34	6	41.9	0.80488	0.862438	1.45994	1.64031	17	17	17	17	17	26
Q8AW82		pa2g4a	6	16.6	0.819255	0.806409	1.24305	1.16805	7	7	7	7	7	18
Q6NYZ0		dnajb11	6	21.1	1.12283	0.741942	0.862894	0.866792	2	2	2	2	2	9
Q6P948		pdha1a	6	13.2	0.774531	1.26945	1.53211	2.00263	2	2	2	2	2	13
A0A140LFZ3			6	12.4	#DIV/0!	#DIV/0!	#DIV/0!	#DIV/0!	0	0	0	0	0	12
F1QXK3	Acyl-coenzyme A oxidase	acox3	6	11.1	0.466704	0.818548	1.01367	0.909683	1	1	1	1	1	19
A0A0R4J8E6		prpf8	6	3.1	1.03787	0.894633	0.979868	1.05569	2	2	2	2	2	12
A0A140LGK1	Plastin-2	lcp1	6	11.2	1.21471	0.970905	1.02126	0.816314	2	2	2	2	2	9
A0JMQ6		cyp4v8	6	12.5	0.454144	1.00498	1.05431	1.0608	3	3	3	3	3	17
A1L259	2-oxo-4-hydroxy-4-carboxy-5-ureidoimidazoline decarboxylase	prhoxnb	6	40.2	1.41157	1.11631	1.16642	1.24292	5	5	5	5	6	19
A2BFT4		ftr82	6	12	1.40175	1.39081	1.43932	2.34231	2	2	2	2	2	13
A2BIN5		mccc2	6	13.4	0.710506	1.07709	1.10996	1.32198	7	7	7	7	7	14
A2CEF5		clic5b	6	31.7	#DIV/0!	#DIV/0!	#DIV/0!	#DIV/0!	0	1	1	1	1	13
A2CF48		crata	6	11.7	0.936068	1.27498	1.31435	1.44232	4	4	4	4	4	12
A2VD36		si:dkey-98p3.7	6	26.9	1.04466	0.682241	1.02501	0.998932	2	2	2	2	2	12
A7E2K4		rplp2l	6	52.6	0.54928	0.44305	0.859295	0.847909	19	18	16	19	18	61
A9C460		si:ch211-170d8.5	6	26.7	0.780499	1.11321	1.22956	1.53218	5	5	5	5	5	19
B0UYD6		qars	6	7.4	#DIV/0!	#DIV/0!	#DIV/0!	#DIV/0!	0	0	0	0	0	11
B0V1K1		aimp1	6	24.8	0.761418	0.713314	1.00621	1.03987	8	8	8	8	8	18
Q7ZV82	60S ribosomal protein L27	rpl27	6	42.6	1.08787	1.09126	1.97018	2.18251	13	13	13	13	13	24
Q561X9	3-hydroxybutyrate dehydrogenase type 2	bdh2	6	26.1	0.780943	0.925813	1.00884	1.09201	7	7	7	7	7	12
B7ZD32	40S ribosomal protein S24	rps24	6	45.4	0.661883	0.935287	1.37369	1.50091	23	22	23	23	23	43
B8JIB4		enpep	6	7.4	1.88712	0.603999	1.30441	0.521637	3	3	3	3	3	8
B8JIF1		as3mt	6	19.9	#DIV/0!	#DIV/0!	#DIV/0!	#DIV/0!	0	0	0	0	0	8
B8JKP3	Probable thiopurine S-methyltransferase	zgc:109981	6	33.3	0.969911	1.10097	1.13694	1.09342	1	1	1	1	1	13
B8JL46		zgc:158450	6	4.1	1.33363	0.666039	0.677341	0.871363	2	2	2	2	2	14
B8JLC8		si:ch73-131e21.5	6	32.8	0.951048	0.867794	0.952233	0.942662	6	6	6	6	6	11
E7F1Y3		CU928854.1	6	18.5	0.830048	1.68376	1.89067	2.99211	1	1	1	1	1	10
Q7ZW40		uso1	6	8.4	0.951199	0.921952	1.11917	0.578501	4	4	4	4	3	9
Q5CZW2		upp1	6	31.3	1.10477	1.3303	1.40882	1.45768	7	8	9	9	9	28
E9QFD8		vtg4	6	7.6	1.64894	0.634594	1.27033	1.04626	3	3	3	3	3	20
E9QFI5		dbi	6	52.9	0.520092	0.339938	0.626781	0.556592	10	8	8	10	10	33
F1Q883	6-phosphogluconate dehydrogenase, decarboxylating	pgd	6	13.9	0.970129	1.04214	0.982706	1.05807	5	5	5	5	5	15
F1Q8A5		hnrnpd	6	21.7	0.683891	1.06771	1.17472	1.26863	2	2	2	2	2	13
F1Q8P7		eif2s2	6	20.5	#DIV/0!	#DIV/0!	#DIV/0!	#DIV/0!	0	0	0	0	0	12
F1Q911		zgc:64106	6	24.5	0.57848	1.75679	1.32715	1.01648	4	4	8	8	8	20
F1QAZ9		hnrnpk	6	16.7	1.3991	1.42741	2.16791	1.93094	2	2	2	2	2	9
F1QDJ9	Signal recognition particle subunit SRP72	srp72	6	11.1	0.801824	0.829832	1.00416	0.943199	3	3	3	3	3	11
F1QIJ9		cyp8b1	6	14.4	0.878803	1.167	1.01392	1.05311	4	4	4	4	4	15
F1QVB1		ptgr1	6	17.9	1.10221	1.21833	1.16679	0.800792	4	4	4	4	4	10
F1QYD1		cyp2x9	6	12.6	0.749338	0.869081	0.896176	1.20999	7	7	7	7	7	22
F1QZA5		psmd6	6	12.2	1.00659	0.93961	1.188	1.16939	2	2	2	2	2	17
Q1MTC6		vtg7	6	5.4	1.12837	0.526932	1.27864	1.60754	4	4	4	3	4	17
Q5MJ86	Glyceraldehyde 3-phosphate dehydrogenase 2	gapdh-2	6	20.6	0.988196	1.15925	1.26893	1.25765	2	2	2	2	2	14
F1R5X7		dhrs11b	6	31.4	1.2716	1.65563	1.84528	2.13442	2	3	3	3	3	15
F1RCV0		abcc2	6	4.6	1.58258	0.896339	1.13003	1.20732	1	1	1	1	1	12
F6NMD4		si:ch211-288g17.4	6	12.9	1.22445	1.06267	0.995227	1.0524	1	1	1	1	1	10
F6P928			6	15.2	0.768199	0.91153	1.23879	1.24899	2	2	2	2	2	11
F8W3Q0		si:ch73-361h17.1	6	24.7	#DIV/0!	#DIV/0!	#DIV/0!	#DIV/0!	0	0	0	0	0	16
F8W4J1		si:ch73-103b2.3	6	36.6	1.04832	0.997625	1.01268	1.05883	12	12	12	12	12	32
Q6PBI5	40S ribosomal protein S25	rps25	6	37.1	0.651943	0.587926	1.044	1.34999	9	9	9	9	9	21
Q1JPY5		cyp51	6	9.8	#DIV/0!	#DIV/0!	#DIV/0!	#DIV/0!	0	0	0	0	0	9
Q3B7E4		hrsp12	6	73.7	0.896115	1.1414	1.18233	1.44317	12	12	13	14	15	30
Q3B7R0		cyc1	6	19.9	1.19924	0.937774	1.20739	1.31457	7	6	7	7	7	18
Q4G5W0		rtn4a	6	24.4	0.577646	0.773604	0.970403	0.919979	9	9	9	9	9	29
Q4VBV1	Cytochrome b-c1 complex subunit 7	uqcrb	6	44.1	0.836885	0.760443	1.30074	1.50304	5	5	5	5	5	16
Q502D1	Glyoxalase domain-containing protein 5	glod5	6	40.5	0.841136	1.16011	1.54533	1.67763	6	6	6	6	6	16
Q503Y1	Glutathione peroxidase	gpx4b	6	58	1.07788	0.795287	0.853288	0.759551	2	2	2	2	2	12
Q567K2		esd	6	28.7	1.22111	1.1353	1.32726	1.24686	5	4	5	5	5	12
Q5RH26	ATP synthase subunit gamma	atp5c1	6	27.4	1.48873	1.26049	1.86274	1.94964	6	7	6	7	7	19
Q5TZ85		cyp2p9	6	11.9	0.614705	0.677635	0.981556	0.799881	7	7	7	7	7	18
Q5U386		ppm1bb	6	16.5	0.511702	1.18838	1.69902	1.90169	2	2	2	2	2	10
Q5XJ36	Protein DJ-1	park7	6	34.4	0.866433	0.930301	1.02213	1.13918	9	9	9	9	9	25
Q66JN5		pon1	6	22.2	0.94426	1.54077	1.62866	1.26064	2	2	2	2	2	14
Q6AZC0		zgc:92041	6	25.9	1.13864	0.801266	0.648794	0.691333	7	7	7	6	7	16
Q6AZC1		psmc5	6	15.8	1.09202	0.914038	0.0129147	0.919565	2	2	2	1	2	9
Q6DGA6	Allantoicase	allc	6	20	0.55781	0.984827	1.19971	1.54511	3	3	3	3	4	17
Q6DGI6	Thioredoxin	txn	6	57	1.25357	0.869657	0.870358	0.805763	15	15	15	19	19	30
Q6DHK1	NAD(P)H-hydrate epimerase	apoa1bp	6	27.2	0.863329	1.0532	1.06388	1.04484	1	1	1	1	1	12
Q6DI20		dpp3	6	10.9	0.648024	0.660202	1.19882	1.58014	1	1	1	1	1	13
Q6GQN6		acaa1	6	20.6	0.832559	1.0954	1.72772	1.72421	6	6	6	6	6	15
Q6IMW5		fabp6	6	47.3	1.09034	0.972134	8.32851	1.21248	6	6	6	6	6	17
Q6IQI7		hspe1	6	60	1.07344	1.03526	0.928469	1.13605	10	10	10	10	10	23
Q6NVI6		cct5	6	10.4	#DIV/0!	#DIV/0!	#DIV/0!	#DIV/0!	0	0	0	0	0	8
Q6NWE0	Ester hydrolase C11orf54 homolog	zgc:85789	6	22.9	0.698461	1.06195	1.36252	1.83646	2	2	2	2	2	13
Q6NWF0		zgc:85777	6	16.4	#DIV/0!	#DIV/0!	#DIV/0!	#DIV/0!	0	0	0	0	0	9
Q6P0I2	Proteasome subunit alpha type	psma8	6	29.1	1.00307	1.01854	0.979889	0.965462	6	4	6	6	6	26
Q6P0V8	Annexin	anxa5b	6	23.3	0.616441	1.53707	1.37684	0.76665	2	2	2	2	2	8
Q6P963	Hydroxyacylglutathione hydrolase, mitochondrial	hagh	6	20.1	1.13105	1.00457	1.04976	1.00893	2	2	2	2	2	16
Q6PC90	40S ribosomal protein S12	rps12	6	40.2	0.786188	0.912288	1.45031	1.42983	14	14	14	14	14	39
Q6PD83	Basic leucine zipper and W2 domain-containing protein 1-A	bzw1a	6	13.6	0.670176	0.764512	0.914125	1.18256	1	1	1	1	1	14
Q6Q420		rps15a	6	41.5	0.666414	0.791094	1.16971	1.20815	3	3	3	3	3	26
Q6TGV6	Proteasome subunit alpha type	psma5	6	28.2	0.75673	0.890382	1.23277	1.2415	4	3	4	4	3	19
Z4YIM6	Eukaryotic translation initiation factor 3 subunit D	eif3d	6	17.8	0.98106	0.849551	1.04392	1.05495	4	3	5	5	5	9
Q6TNW3		abce1	6	8.2	#DIV/0!	#DIV/0!	#DIV/0!	#DIV/0!	0	0	0	0	0	8
Q6YBS2	Adenylyl cyclase-associated protein	cap1	6	13.8	0.919891	1.25408	1.16146	0.954663	3	3	3	3	3	14
Q7T2E1		sec13	6	27.8	0.953743	0.938695	1.22417	1.27216	3	3	3	3	3	8
Q7T368		pdhb	6	17.3	0.912219	1.08888	1.48062	1.55208	1	1	1	1	1	12
Q7T3H5		gpd1c	6	24.4	0.907979	1.24271	1.09797	0.950445	5	5	5	5	5	16
Q7ZTI0		ssb	6	19	0.653422	0.738315	1.18534	1.00382	4	4	4	4	4	20
Q7ZTZ4		fbl	6	21.8	0.661431	0.735576	1.32487	1.17287	6	6	6	6	6	16
Q7ZU89		arcn1b	6	10.4	0.786764	0.770023	0.93412	1.00048	3	3	3	3	3	18
Q7ZV49		hprt1	6	33	1.36585	1.04955	1.17673	1.25146	5	5	5	5	5	21
Q7ZWA9		eif5	6	17.2	0.961994	0.831649	0.975053	0.995542	4	4	4	4	4	10
X1WH26			6	15.7	1.16029	1.34336	1.34686	1.44691	2	2	3	2	3	11
A0A0G2KWP7			7	29.9	0.834704	1.03708	1.315	1.73275	8	8	8	8	8	28
H9GXR0		zgc:85829	7	57.3	0.455029	0.831646	1.40241	2.31808	11	11	11	11	11	26
A0A0G2KYZ5			7	31.7	1.70514	1.3863	2.29573	2.75763	6	6	6	6	6	25
A0A0G2L2K5			7	15.9	1.49579	1.21837	1.25796	1.25618	8	8	8	9	9	28
E7F4R9	Isocitrate dehydrogenase [NADP]		7	16.3	0.927781	1.14676	1.4741	1.79323	5	5	5	5	5	17
Q1LXJ8		zgc:109868	7	17.2	0.981288	1.42966	0.975067	0.78522	4	4	4	4	4	18
E7FDF9	Malate synthase	LOC564844	7	14.6	0.668646	0.975218	1.19829	1.78134	1	1	1	1	1	19
F6PBQ1			7	23.3	0.412028	0.958632	1.14251	1.30163	11	11	11	11	11	23
E7F022		xdh	7	4.9	0.950349	1.01966	0.714917	1.36437	2	2	2	2	2	18
F1QY43		psmd1	7	7.7	0.883219	0.748089	1.27011	1.53337	5	6	5	6	6	18
A0A0R4IKT0			7	30.8	0.785724	1.13043	1.05478	1.26624	5	5	5	5	5	17
E7F4J8		BX088525.2	7	17.5	1.05409	1.01302	1.15761	1.27948	4	3	4	4	4	18
Q6NXA4	Interleukin enhancer-binding factor 3 homolog	ilf3	7	8.9	#DIV/0!	#DIV/0!	#DIV/0!	#DIV/0!	0	0	0	0	0	9
A0A140UHW3			7	27.1	0.684926	1.01294	1.18558	1.35806	4	4	4	4	4	17
A3KPR3		histh1l	7	27.9	0.37057	0.910749	1.13492	1.3756	11	11	11	11	11	28
A3KPR4	Histone H4	wu:fe37d09	7	51.5	0.711853	1.29482	1.52772	1.73889	40	39	41	40	41	96
A8E526		rpl14	7	44.6	0.826463	0.83763	0.966409	1.30742	19	20	20	20	19	44
B0R028	Proteasome subunit beta type	psmb5	7	30.9	0.833028	0.97623	1.13148	1.32062	4	4	4	4	4	15
B0S754		snrnp200	7	3.9	#DIV/0!	#DIV/0!	#DIV/0!	#DIV/0!	0	0	0	0	0	9
B0UYB4		si:dkey-91i10.3	7	13.6	0.574564	1.38571	1.1066	1.45205	2	2	2	2	2	11
Q9I8L5	Fatty acid-binding protein 10-A, liver basic	fabp10a	7	60.3	0.910794	0.976869	1.03929	1.19114	54	57	56	54	55	178
B3DFP9		apoa2	7	48.9	1.55684	0.885461	0.870783	0.891784	24	24	24	24	24	57
B8JIS1		atp5f1	7	27	0.901601	1.11132	1.46184	2.09492	6	6	6	6	6	26
E7F3G8		si:ch211-113j14.1	7	13.3	0.640003	1.02229	1.16055	1.42416	7	7	7	7	7	23
Q9DGK4	Translationally-controlled tumor protein homolog	tpt1	7	38	0.777061	0.77251	1.18855	1.43384	17	17	17	17	17	40
E9QE30		fdps	7	23.7	1.28718	0.820172	0.910455	1.26478	5	5	5	5	5	17
E9QIR9		rpl10	7	47.2	0.931977	0.955558	1.64278	2.08551	23	23	25	25	25	48
Q5TZ78		cyp2ad3	7	16.2	0.613308	0.934513	1.07655	1.20632	5	4	5	5	5	20
F1QHC4		lmnb1	7	16.3	0.68029	1.00099	1.16299	0.950978	1	1	1	1	1	15
F1R9Q0	Probable signal peptidase complex subunit 2	spcs2	7	30.3	0.66817	0.694379	0.792462	0.810523	5	5	5	5	5	17
F1Q884	Glycine N-methyltransferase	gnmt	7	29.9	0.626217	1.11033	1.37846	1.73449	17	17	16	17	17	38
F1QAI1		crot	7	11.4	#DIV/0!	#DIV/0!	#DIV/0!	#DIV/0!	0	0	0	0	0	16
F1QBM2		pdcd4a	7	18.4	0.67468	0.994525	1.24693	1.42276	2	2	2	2	2	11
F1QDA6		zgc:101071	7	11	0.514432	0.599569	1.06724	0.963555	6	6	6	6	6	12
F1QDQ5		manf	7	36.7	0.858558	0.872511	1.24884	1.33935	7	7	7	7	7	15
F1QVW1		mars	7	8.5	0.714268	0.692763	1.00637	1.18102	2	2	2	2	2	12
F1QFQ6		dlst	7	17.5	1.01335	1.07695	1.11687	1.2548	5	5	5	5	5	26
F1QGW6		eif2s3	7	18.9	0.915607	0.90004	1.26123	1.20879	6	6	6	6	6	19
F1QHR0		apoa4	7	29	0.922028	0.768784	1.1921	0.827797	6	6	6	6	5	20
F1QIL6		acad9	7	13.3	1.13612	0.980261	1.21674	1.20357	1	1	1	1	1	11
F1QPC1		cyp3c1	7	15.6	0.984461	1.26856	1.06439	0.855448	3	3	3	3	3	21
F1QTL9		hnrnpa0b	7	26.8	0.659378	0.993375	1.93002	2.28068	11	11	11	11	11	31
F1QUE3		uqcrc1	7	19.5	0.774513	1.14829	1.57845	1.89581	3	3	3	3	3	21
Q6NUZ3		syncrip	7	12.7	0.528238	0.906675	1.23152	1.33944	7	7	7	7	7	32
F1QYC7	3-hydroxyanthranilate 3,4-dioxygenase	haao	7	25.8	0.864473	1.11477	1.08916	1.17488	13	12	12	12	12	39
Q7ZUI5	Nucleoside diphosphate kinase	nme4	7	38.9	1.31133	1.25159	0.754815	0.93983	8	8	8	8	8	17
F1R3J9		prmt1	7	23	1.32623	0.793529	1.0506	1.10424	4	4	4	4	4	20
F1R4C8		ndufs3	7	28.6	0.576047	0.798743	1.05539	1.11966	4	4	4	4	4	19
Q5PRA2	Probable 2-oxoglutarate dehydrogenase E1 component DHKTD1, mitochondrial	dhtkd1	7	12.2	0.6509	1.0875	1.60803	1.64832	3	4	4	4	4	16
Q6NWG1	Leucine-rich repeat-containing protein 59	lrrc59	7	20.7	0.936699	0.719427	0.977797	1.06073	5	5	5	5	5	18
F1RBS6		nme2b.2	7	39.9	0.853224	0.820097	1.01508	1.11541	13	13	13	13	13	34
K7DY73		hao1	7	23.6	1.08692	1.27317	1.177	1.51783	5	5	5	5	5	15
Q90487	Hemoglobin subunit alpha	hbaa1	7	60.1	1.18697	0.966312	1.33412	1.40866	28	27	28	28	29	70
Q1L872		sult3st3	7	29.8	0.470066	0.734155	1.32603	0.970485	5	5	5	5	5	24
Q1RLT1	GMP reductase	gmpr2	7	24.1	0.409888	0.794969	1.15242	1.33844	3	3	3	3	2	11
Q568L5	Alcohol dehydrogenase [NADP(+)] B	akr1a1b	7	28.1	0.469756	1.46234	1.98894	2.17603	3	3	5	5	4	17
Q5BJ17	Elongation factor Tu	tufm	7	20.1	0.893258	0.957866	1.38054	1.23098	2	2	2	2	2	11
Q5BKV9		rpl9	7	43.8	0.709074	0.741917	1.2632	1.48374	17	16	17	17	18	48
Q5U3G0		pgrmc1	7	41.3	0.489109	1.10461	1.3952	2.0392	20	19	20	18	19	42
Q6DHS3	Ribosomal protein L15	rpl15	7	27.9	0.932835	1.02269	1.39558	1.4904	11	11	11	11	11	31
Q6DRI1	Eukaryotic translation initiation factor 3 subunit E-A	eif3ea	7	17.7	0.673436	0.961829	1.40993	1.39197	4	3	4	4	4	12
Q6IQE2		eef1b2	7	31.1	0.593056	0.72574	1.31388	1.49631	9	8	9	9	9	26
Q6NXC1		rbm4.3	7	26.4	0.540797	1.07389	1.3849	1.39747	6	6	6	6	6	15
Q6NY77	Probable 4-hydroxy-2-oxoglutarate aldolase, mitochondrial	zgc:77082	7	17.9	0.678222	1.13564	0.997234	1.07524	1	1	1	1	1	17
Q6NYV1		psmd3	7	15.9	1.2945	0.860539	0.870842	0.713046	1	1	1	1	1	16
Q6P102		ywhabl	7	35.1	1.08693	0.909107	1.05549	1.02261	6	6	6	6	6	16
Q6P3G9		erp44	7	21.3	1.57005	1.50256	1.2002	1.87094	1	1	1	1	1	13
Q6P5L3	60S ribosomal protein L19	rpl19	7	26	0.958607	0.901697	1.59756	1.65852	16	16	16	16	16	39
Q6PBI0		sucla2	7	14.4	1.01643	1.09581	1.11227	1.20178	2	2	2	2	2	15
Q6PC95		tuba8l2	7	20.3	0.883519	0.927783	1.21469	1.68785	10	10	9	10	10	38
Q6ZM34		vps35	7	10.4	#DIV/0!	#DIV/0!	#DIV/0!	#DIV/0!	0	0	0	0	0	10
Q7SXA1		rpl26	7	35.2	1.05403	1.02722	1.72372	1.99153	6	7	7	7	7	17
Q7SZR4		pgam1a	7	30.7	0.748551	0.869324	1.06709	1.16716	6	6	6	6	6	27
Q7T1K0		rpl17	7	40.2	0.952278	0.858738	1.60804	1.78657	13	13	13	13	13	48
Q7ZV55	Eukaryotic translation initiation factor 3 subunit I	eif3i	7	28	0	1.09557	2.21173	1.24556	1	0	1	1	1	9
Q7ZVF3	Succinate dehydrogenase [ubiquinone] flavoprotein subunit, mitochondrial	sdha	7	15.7	0.80414	1.08089	1.42652	1.38246	4	3	4	4	4	13
Q7ZW20		ywhae1	7	27.8	0.914089	0.970965	1.15288	1.13245	7	7	7	7	7	18
Q8JFW7		bcap31	7	34.8	0.984766	0.836066	0.996523	0.897086	7	7	6	7	7	20
Q9PUE4	Coatomer subunit gamma-2	copg2	7	8.6	0.532141	0.811292	1.05171	1.23623	6	6	6	6	6	16
X1WET9		eif3bb	7	12.8	0.92391	0.882397	1.11067	1.08375	3	4	4	4	4	17
A0A0G2KSN1			8	12.8	0.843417	1.15648	0.895254	0.868738	7	7	8	10	9	19
F1RBW3		prkcsh	8	24	0.940453	0.998633	1.16663	1.30604	11	12	11	12	13	23
A0A0R4INN3			8	18.4	0.906161	1.94145	2.71365	3.55989	4	4	4	4	4	16
A0A0R4IQZ3		eci1	8	27.6	0.647165	1.0415	0.820391	1.45873	8	8	8	8	8	33
Q6QA33	Estradiol 17-beta-dehydrogenase 12-B	hsd17b12b	8	26.4	0.779406	0.769397	1.04699	0.970131	7	7	7	7	7	37
Q6TEN9		cpne1	8	14.6	1.10864	0.975821	0.997696	0.879418	3	3	3	3	3	25
B8A4B0		glud1a	8	18.8	1.34226	1.37392	1.20738	1.13385	8	8	8	8	8	24
A0A0R4IWE1			8	34.9	0.967834	1.29863	1.13359	1.17879	7	7	7	7	7	28
A0A0R4IXF5			8	31.4	0.75262	1.06506	1.19683	1.22332	8	8	8	8	8	21
A3KPS7		ugt5c2	8	14.3	0.413663	0.943868	0.914783	0.994808	15	15	15	15	15	43
A7MBU9		cmbl	8	29.9	0.677336	1.32125	1.0978	1.19305	5	5	5	5	5	15
B0UYN4		zgc:162944	8	46.9	0.500007	0.972117	1.50619	1.48036	6	6	6	6	6	27
B0V1I3		upb1	8	23.7	1.09046	1.16223	1.10462	1.16724	7	7	7	7	7	21
Q08BB2	Probable carboxypeptidase PM20D1.2	pm20d1.2	8	15.3	0.937068	0.853922	1.01856	1.25868	3	3	3	3	3	13
Q7ZVY5	Citrate synthase, mitochondrial	cs	8	21.2	0.814048	1.19361	1.39361	1.66485	3	3	3	3	3	18
E9QCD1		fga	8	17.3	1.30946	0.982969	1.23661	1.18589	5	5	5	5	5	12
B8A5Q1		cyp2u1	8	18.9	0.789138	0.918835	1.266	1.12469	3	3	3	3	3	25
B8JKN6		ppiaa	8	55.5	0.803685	0.994558	1.49728	1.54363	28	26	29	29	29	53
E7FB64		cyp4t8	8	15.5	0.821686	1.04548	1.33144	1.44518	3	3	2	3	3	15
F1Q4N4		ndufs2	8	21.3	0.936755	0.982282	0.960058	0.91325	2	2	2	2	2	20
F1Q8Q6		dak	8	14.4	0.640826	0.775734	0.867762	0.814494	3	2	3	3	3	14
F1Q9R5		steap4	8	15.3	1.42426	2.60435	1.27471	1.13759	6	6	6	6	6	18
F1Q9T9		rpl23a	8	39.5	1.01996	0.984087	2.28287	2.77495	22	22	22	22	22	37
F6P055		acaca	8	4.5	0.645802	0.891762	1.00134	1.12906	2	2	2	2	2	11
F1QIJ4		cyp2x12	8	18.1	0.491473	0.667707	0.761288	0.594404	5	5	5	5	5	23
F1QNZ1	MOSC domain-containing protein 1, mitochondrial	zgc:110783	8	28	1.05911	1.05534	1.08596	1.26799	7	7	7	7	7	25
X1WBU0		gstz1	8	34.6	0.466684	0.617846	1.26203	1.17405	4	4	4	4	4	31
F1QSP8		prdx4	8	39.6	0.812782	1.06093	0.874388	1.06433	2	2	2	2	2	19
F1R0C4		zgc:171674	8	25.8	0.812906	0.841492	1.09061	1.01899	5	5	5	5	5	21
F1R319		slc25a11	8	30.5	0.493165	0.999352	1.17151	1.46365	2	2	3	3	3	10
Q0P487	NADH-cytochrome b5 reductase 2	cyb5r2	8	27.5	0.74781	0.7519	0.947623	1.2382	7	7	7	7	7	22
Q24JV3		rpl31	8	46.3	0.782934	0.890679	1.48844	2.18577	7	7	7	7	7	19
Q503E6		ezra	8	13.1	1.1721	1.182	0.948209	1.11369	2	2	2	2	2	16
Q5TYY5		akr1b1	8	27.3	0.866253	1.00676	1.18103	1.35369	3	3	4	4	4	17
Q5U369	Annexin	anxa3b	8	20	1.20111	1.03905	1.18222	0.884792	4	4	4	4	4	13
Q6DRD1		atp5o	8	47.8	1.02783	0.944411	1.22371	1.54844	17	17	16	18	18	52
Q6IQQ0		rpl21	8	39.4	0.725295	0.822516	1.27023	1.42355	6	7	6	7	7	27
Q6IVM1		rbp2b	8	55.6	1.29073	1.04078	0.894421	0.986336	10	10	10	10	10	28
Q6NXA6		adh5	8	23.7	0.523693	0.869327	1.0659	1.19349	15	13	16	15	16	33
Q6P009		dao.3	8	24.4	0.555697	1.18409	1.28651	1.8055	6	6	6	6	6	20
Q6P0U6		dnajc3	8	16.1	0.716558	0.796663	1.02128	1.0712	4	4	4	4	4	14
Q6P5J0		amy2a	8	18.2	1.37433	1.06497	0.799902	0.783172	5	5	5	5	5	15
Q6PC14	60S ribosomal protein L23	rpl23	8	55	0.75428	0.824936	1.21741	1.35127	31	31	31	33	31	57
Q6PC80		rps5	8	35.8	0.923414	0.806186	1.72433	2.09337	8	8	8	8	7	15
Q7SXK5	Probable imidazolonepropionase	amdhd1	8	25.2	0.753771	1.21348	1.68587	3.02463	3	3	3	3	3	17
Q7T1D8		phb	8	32.5	0.90539	0.805827	1.57044	1.58305	4	3	4	4	4	27
Q7T1J9		rps10	8	42.8	0.4083	0.568766	1.27437	1.68183	13	13	12	13	13	26
Q7ZUI4	Thioredoxin	zgc:56493	8	67.6	0.811247	1.0245	1.07177	1.13491	24	23	24	24	24	53
Q7ZUN7		ckmt1	8	22.3	0.976687	0.897979	1.04849	1.28814	7	8	8	8	7	22
Q7ZWJ4	60S ribosomal protein L18a	rpl18a	8	43.2	0.790943	0.790004	0.969601	1.2528	16	16	16	16	16	32
Q7ZZ04		echs1	8	35.7	0.676228	1.1033	1.16721	1.26457	7	7	7	7	7	29
Q803F6	40S ribosomal protein SA	rpsa	8	40.3	0.676762	0.880204	1.64709	2.65252	23	20	23	24	25	58
Q803P2	T-complex protein 1 subunit alpha	tcp1	8	15.6	0.682681	0.874346	1.21583	1.58029	4	4	4	4	4	17
Q8UVG6		rbp2a	8	69.6	0.721013	0.932263	1.21457	1.32805	5	4	4	7	7	25
Q90WA5		pdip5	8	20	1.26939	1.09558	1.29885	1.25299	15	15	15	15	15	37
Q90ZM2	Protein transport protein Sec61 subunit alpha-like 1	sec61al1	8	15.1	0.637127	0.757849	0.910089	0.971096	20	20	20	20	20	35
Q9DGL3		atp1b1a	8	26.8	1.07539	0.823059	0.913319	0.748622	7	7	7	7	7	23
R4GEC2		a1cf	8	16.2	0.610336	0.938285	1.34131	1.49207	10	10	10	10	10	29
X1WD71			8	7.5	1.21843	0.881451	0.889688	0.963872	1	1	1	1	1	14
X1WEJ6			8	8	1.10888	0.919678	1.10356	0.971444	7	7	7	7	7	14
E7FCU0		npm1a	9	30.1	0.933095	0.862952	1.25347	1.14645	5	6	6	6	7	24
Q7ZUN6		paics	9	24.5	0.751627	0.907512	1.34391	1.41268	7	7	7	7	7	21
F1R4Z8	Glutathione S-transferase	gstal	9	34.5	0.72359	1.11793	1.24106	1.42723	18	18	18	18	18	48
A0A0R4IG82		uqcrc2a	9	26.1	0.844476	0.916516	0.995632	1.15532	9	9	9	9	9	20
Q6AZA0	Acetyl-CoA acetyltransferase, mitochondrial	acat1	9	22.4	0.800781	1.4509	1.48805	1.83268	6	6	6	6	6	28
E7F4T0		plecb	9	2.5	1.39625	1.10354	1.01128	0.921852	2	2	3	3	2	15
Q8JGR4	60S ribosomal protein L24	rpl24	9	45.2	0.523142	0.837134	1.62953	1.98581	15	15	15	15	15	46
A0A0R4IND9		eppk1	9	15.9	0.925973	0.944846	1.31678	1.36673	8	8	8	8	8	24
B3DIZ3		zgc:171967	9	10.6	0.969597	0.928605	1.0072	1.08673	10	10	10	10	10	21
A0A0R4IQY2			9	21.1	1.22625	1.08611	1.06999	1.02647	1	1	1	1	1	10
Q6DGY8	Proteasome subunit alpha type	psma6b	9	39.8	0.808418	0.990268	1.13289	1.18968	3	3	3	3	3	17
A0A0R4IVE7		abcb11b	9	8.1	0.745842	0.938926	1.02935	1.13687	4	4	4	4	4	16
A0A0R4IZJ7			9	27.4	0.846432	1.74102	1.46073	1.43056	7	6	8	8	7	31
A2AWA1		ddx39aa	9	17.8	0.942539	0.776936	0.977649	1.05962	2	2	2	2	2	19
A3KQR0		acadl	9	26	0.702291	0.930418	1.11713	1.47861	11	11	11	11	11	28
Q8JGS9	40S ribosomal protein S18	rps18	9	45.4	0.802049	0.819805	1.21338	1.43441	15	15	15	15	15	33
A7YT77		qdpra	9	55.3	0.62166	1.08954	1.17305	1.36272	24	24	24	25	26	40
A8KC02		cbr1l	9	39	0.628964	1.58952	1.35451	1.75743	16	16	16	16	16	39
A9C3P0	Malectin	mlec	9	27	0.855295	0.861901	1.11818	1.10644	7	7	7	7	7	22
Q66I21	Aldehyde dehydrogenase family 8 member A1	aldh8a1	9	20.3	0.855071	1.01252	1.05942	1.33908	13	13	13	13	13	44
B0S5S6		pdia5	9	19.5	0.561182	1.07837	1.5665	1.4975	6	6	6	6	5	24
B8A4C4		mogs	9	12.1	0.561638	0.680611	0.932292	1.04225	3	3	3	3	3	14
B8A5D3		nars	9	16.5	0.849229	0.663529	1.10251	1.11272	15	15	15	15	15	39
Q6PHD9	Selenium-binding protein 1	selenbp1	9	26.3	0.665066	1.18981	1.33104	1.71252	9	9	9	9	9	25
E9QCI4		zgc:65987	9	38.2	1.14465	1.07015	1.0189	1.21855	15	15	15	15	15	41
F1Q713		sord	9	24	0.888964	1.06975	0.962385	1.14385	15	15	17	15	17	43
F1Q8W8		calrl2	9	30.5	1.2316	0.959263	1.13242	1.0947	7	7	7	8	7	22
F1QB21		decr1	9	34.5	0.954938	1.0405	0.928976	0.987331	18	18	17	17	17	53
F1QB54		pabpc1a	9	13.7	0.598276	0.752323	1.0913	1.03091	4	3	3	4	4	25
F1QFN3		larsb	9	13.3	0.768747	0.772007	1.25961	1.4667	3	3	3	3	3	14
F1QGK0		gpd1b	9	25.8	1.10556	1.11801	1.23647	1.41156	11	11	11	11	11	32
F1QUV7		gars	9	14.5	0.850868	0.820759	1.2927	1.37203	7	7	7	7	7	18
F1R9Y9		etfb	9	40.9	0.543025	0.778463	0.87472	1.0627	8	8	8	8	8	27
F1RE17		acad11	9	11.4	0.934113	0.832942	0.956028	0.900209	6	6	6	6	6	15
F6P2R4			9	25.1	0.657562	1.39233	1.68739	2.20076	10	10	10	10	10	35
F8W4Z6	NADPH--cytochrome P450 reductase	zgc:63480	9	13.3	0.683383	0.776222	1.03182	1.18358	7	7	7	7	7	23
P62247	40S ribosomal protein S8	rps8	9	43.8	0.594357	0.797719	1.26657	1.47225	35	35	35	35	35	69
Q1L907		tfa	9	35.4	0.745219	1.03638	1.04473	1.33573	42	41	41	42	41	81
Q1LWH1		rps16	9	44.5	0.786704	0.817115	1.13782	1.50443	9	9	9	9	9	27
Q4V914	Histone H2A	h2afy2	9	24.8	0.919277	1.27569	1.41113	1.28788	1	1	1	1	1	18
Q5SPA3		acat2	9	34.9	0.342032	0.719761	0.803449	1.1613	13	12	12	13	13	31
Q6DI22		hadh	9	29.1	0.663413	0.975331	1.18745	1.49484	7	7	7	7	7	32
Q6DRE6		rpl12	9	63.6	0.827935	0.814108	1.19182	1.21219	19	21	20	20	20	44
Q6GQN9		dhrs1	9	37.4	1.17433	1.17534	1.08052	1.16693	15	15	15	15	15	34
Q6IMW6		rps13	9	49.7	0.672404	0.811099	1.27662	1.39016	14	14	14	15	14	48
Q6IQP3	Calumenin-A	calua	9	35.2	0.998701	0.883081	1.25434	1.32557	12	12	12	12	13	26
Q6NYJ9		ap2b1	9	10	0.766174	0.889591	1.15368	1.39605	4	4	4	4	4	14
Q6P016	Purine nucleoside phosphorylase	pnp4b	9	40.8	0.518732	0.897532	1.15395	1.28028	5	6	6	6	6	23
Q6P0V6	60S ribosomal protein L8	rpl8	9	44	1.03059	0.757926	1.17778	1.28474	19	19	19	20	20	40
Q6TNU6	Dihydrolipoyl dehydrogenase	dldh	9	20.7	0.982772	0.964875	0.909046	0.933139	4	4	4	4	4	26
Q6TNV0		cox4i1	9	51.5	0.684506	0.996129	1.17645	1.17463	27	27	27	27	27	67
Q7T2J4		adh8b	9	22.3	0.789868	0.945668	0.97174	1.05591	5	6	7	6	6	31
Q7ZUW8	Aspartate aminotransferase	got1	9	21.7	0.688052	0.981443	1.20523	1.41962	7	7	7	7	7	27
Q804G3	Annexin	anxa11b	9	21	0.792725	1.02868	1.21272	1.18646	8	8	8	8	8	22
Q8UVG7		fabp3	9	51.1	0.533525	0.706181	0.860475	0.952866	18	17	18	18	18	34
Q90Z10	60S ribosomal protein L13	rpl13	9	36.5	0.862947	0.821728	1.59767	1.88525	20	20	20	20	20	42
A0A0R4I9F5	Dolichyl-diphosphooligosaccharide--protein glycosyltransferase 48 kDa subunit	ddost	10	26.8	0.586842	0.766784	1.25562	1.88329	25	25	25	25	25	54
A0A0R4IAH3			10	27.6	0.749258	0.800045	1.04508	1.26393	8	8	8	8	8	20
A0A0R4IF47		ctnna1	10	13.1	1.14476	0.956908	1.07965	1.04413	4	4	4	4	4	13
F1QE89		aldh5a1	10	28.2	1.00228	1.4354	1.10104	1.38298	5	5	5	5	5	17
Q7ZU96		cct8	10	21.6	1.20468	0.84111	1.28901	1.22122	2	2	2	2	2	18
A0A0R4IL29			10	30.9	1.11471	0.908147	1.13787	1.07615	16	17	15	17	16	60
A0A0R4IYX1		adka	10	35.9	0.840938	0.880046	1.0068	1.52173	11	10	10	11	12	42
A2BHD8	Beta-hexosaminidase	hexb	10	21.6	1.08513	1.6995	1.33038	1.19544	6	6	6	6	6	30
A9JRF7		si:ch211-93f2.1	10	16.2	0.794179	1.40183	1.16129	1.29131	18	18	18	18	18	43
A9JT04		cbsa	10	21.4	0.811047	0.980299	1.12188	1.19967	10	11	11	11	11	30
B0R197		vdac3	10	30.8	1.22441	0.977257	1.16291	1.46422	11	11	11	11	11	27
B0UYJ6		comta	10	37.9	0.619282	0.739	1.1424	1.18635	5	5	5	5	5	29
B0V0X1		pccb	10	22.3	0.892	1.10574	1.16522	1.09316	7	7	7	7	7	17
O73872	Superoxide dismutase [Cu-Zn]	sod1	10	68.8	0.801054	0.754763	0.900481	0.892111	27	26	25	27	27	49
Q90486	Hemoglobin subunit beta-1	ba1	10	79.7	1.01672	0.886926	1.6225	2.08614	52	50	54	58	59	145
B8JIS8		gstm	10	46.6	0.886609	0.917775	1.08165	1.15968	16	16	16	16	16	42
E7FFZ8		pon3	10	29.2	0.832545	0.765553	1.09998	1.08426	19	19	19	19	19	47
F1Q749		dkc1	10	17.2	1.16723	0.733518	0.943904	0.919922	6	5	6	6	6	20
F1QFW5		rpn2	10	19.2	0.615762	1.07291	2.18194	2.77085	8	8	8	8	8	34
F1QD17		nop56	10	24.5	0.900424	0.750018	1.21746	1.21638	13	13	13	13	13	30
F1QDB3		zgc:92630	10	45.1	0.876396	1.19857	1.21439	1.55259	13	13	13	13	13	28
F1QJZ3		agmat	10	32	0.6939	0.924248	0.91147	1.42083	21	19	21	19	21	51
F1QY24		agxta	10	30.4	0.657504	0.889785	1.07224	1.32113	21	20	21	21	21	44
Q4QRJ7	Eukaryotic translation initiation factor 2A	eif2a	10	20.5	0.695282	0.886156	1.21461	1.28048	7	7	7	7	7	13
F1QYS7		acss1	10	16.2	1.14134	1.68989	1.05955	1.25718	3	3	3	3	3	18
F1R4U0		slc25a1b	10	28.7	0.521081	1.18749	1.26551	1.5144	10	10	10	10	10	32
Q567N5		rpl6	10	30.2	0.873488	0.913407	1.27384	1.39657	27	27	26	27	28	56
Q5U3U3	Carnitine O-palmitoyltransferase 2, mitochondrial	cpt2	10	17.6	0.918167	1.06502	1.01233	1.07394	6	5	5	6	6	19
Q6DGJ6		prdx2	10	57.9	0.820684	0.833633	1.07915	1.15545	18	17	18	18	18	44
Q6DGX8	Proteasome subunit alpha type	psma1	10	46.2	1.00682	1.06535	1.16622	0.972784	7	7	7	7	7	35
Q6DHL6	40S ribosomal protein S6	rps6	10	34.1	0.911257	0.870975	1.26333	1.28026	27	26	27	26	27	52
Q6PC69	60S ribosomal protein L10a	rpl10a	10	40.3	0.862379	0.782645	1.06615	1.08609	20	17	19	19	21	55
Q7T2P2		cct3	10	22.5	1.11989	0.891975	1.19403	1.18315	3	3	3	3	3	17
Q7T3B1		psmc2	10	26.1	1.10523	0.944767	1.38635	1.43378	4	4	4	4	4	25
Q7ZU42	Obg-like ATPase 1	ola1	10	27.5	1.10802	0.892789	1.03575	1.02544	5	5	5	5	5	20
Q7ZVG7		fgg	10	23.4	1.05518	1.07113	1.24188	1.10047	4	4	4	4	5	24
Q803E5		etf1	10	24.9	0.974575	0.866321	1.14861	1.08899	4	4	4	4	4	26
Q8AW60		ivd	10	23.7	0.924359	1.03401	0.944018	1.04559	12	12	12	12	12	35
Q9I9E9		eif2s1b	10	34	0.966568	0.812989	1.06093	0.928014	9	9	9	9	9	26
A0A0R4IKM7	Lysine--tRNA ligase	kars	11	23.4	0.982825	0.835522	1.16775	1.03268	6	6	6	6	6	38
Q6DRC0		sars	11	22.7	0.880701	0.84721	1.00398	1.17154	6	6	6	6	6	19
Q6PFQ2	Eukaryotic translation initiation factor 3 subunit C	eif3c	11	12.2	0.892986	0.763005	0.946527	0.922039	12	12	12	12	12	30
A0A140LGU1		hp1bp3	11	19.3	0.574033	1.06262	1.82606	2.0316	1	1	1	1	1	30
A5WUQ7		si:dkeyp-88f5.1	11	5.1	0.768875	1.09735	1.14475	1.41185	3	3	3	4	4	25
A8WGP7	UDP-glucose 6-dehydrogenase	ugdh	11	27.6	1.07779	1.2469	1.54502	1.74794	13	15	15	16	15	48
B1H1J6		dpys	11	23.4	0.784927	1.1716	1.08597	1.75651	12	12	12	12	12	47
B7ZD39		ppa1b	11	54.6	0.997165	1.12351	1.24492	1.21068	18	18	18	18	18	45
E7EZ94		gstt1a	11	44.6	0.732835	1.11773	1.4848	1.89629	33	33	33	33	33	78
F1Q740		vars	11	10.5	0.965705	0.804414	0.974329	0.9309	3	3	3	3	3	19
F1Q8J4		acadvl	11	19	0.704597	0.963106	1.30446	1.46249	4	4	4	4	4	26
F1QC05		ephx1	11	25.7	0.75845	0.988986	1.01092	0.966502	12	12	12	12	12	47
F1QDQ1		copa	11	11	0.522156	0.861246	0.965762	1.44631	3	3	3	3	3	19
F1QFV6		rpl28	11	61.6	0.805248	0.876819	1.22279	1.40702	17	17	17	17	17	36
F1QK60		krt4	11	23.9	1.03407	1.0916	0.707926	0.508194	8	8	8	8	8	25
F1QKH9		rdh1	11	35.8	0.691159	0.791443	0.953705	1.086	27	27	27	27	27	53
F1R4U6		si:ch211-14a17.10	11	10.2	1.31952	1.63836	1.92585	1.09502	6	6	6	6	6	18
F6NLI6			11	52.4	0.615365	0.767339	0.946589	1.04083	26	26	26	27	27	55
H9GX78			11	28.6	0.940171	1.01011	1.02812	1.09705	11	11	11	11	11	34
Q1LYB7		rpl13a	11	42.9	0.675728	0.742506	1.13941	1.55606	22	22	22	21	22	59
Q58EG2	Erlin-1	erlin1	11	33.6	0.568116	0.875187	0.921427	1.10998	16	17	17	17	17	44
Q5TYZ5		cand1	11	9.3	0.623959	0.839196	0.94265	1.12891	2	2	2	2	2	24
Q5TZD2		prdx6	11	48.7	0.758022	1.45284	1.64796	1.65962	7	7	7	7	8	49
Q66I16		etfdh	11	23.2	0.717487	1.39065	1.63464	1.6378	6	6	7	7	8	30
Q6DG85	Uricase	uox	11	37.6	0.725476	0.939018	1.17116	1.15643	34	33	34	34	33	78
Q6IQB1		rpl5b	11	32.4	1.01531	0.86645	1.16737	1.09177	13	13	13	14	14	46
Q6NYE1		fgb	11	25.2	1.19516	1.15406	1.22819	1.16308	10	11	11	11	11	25
Q6PBZ1		rpl7a	11	38	0.49534	0.852493	1.9077	2.17862	20	18	19	20	21	46
Q6PC77		atp5h	11	77	1.13467	1.00355	2.04594	2.52738	11	11	11	11	11	37
Q6PFS4		immt	11	16.1	0.853428	0.84581	1.29533	1.10538	4	4	4	4	4	18
Q6PHK4		agxtb	11	30.7	0.930026	1.30591	1.32985	1.86322	25	25	25	25	25	77
Q6Q417		rpl7	11	40.7	0.692128	0.890929	1.32183	1.66249	37	36	39	38	39	78
Q7SZ49		sdr16c5b	11	33.3	0.543968	0.940289	1.09306	1.09856	15	15	15	15	15	62
Q7ZV05		rps11	11	49.1	0.757726	0.884691	1.39835	1.56262	16	17	17	16	17	56
Q8AWD0		vdac2	11	44.9	1.40308	0.963001	0.950016	1.03913	23	22	22	21	22	56
R4GE02		zgc:114037	11	35.5	0.760643	1.31645	1.54399	1.56711	54	53	55	56	55	102
X1WBT0		LOC100006782	11	7.4	1.22969	1.24585	1.0737	0.925628	7	7	7	7	7	26
A0A0G2L974			12	6.3	#DIV/0!	#DIV/0!	#DIV/0!	#DIV/0!	0	0	0	0	0	17
A0A0R4I9A0	Adipocyte plasma membrane-associated protein	apmap	12	31.3	0.94824	0.82927	0.909583	0.942634	9	9	9	9	9	35
Q6TGS6	Tyrosine--tRNA ligase, cytoplasmic	yars	12	23.8	1.40397	0.857447	1.04305	1.17652	1	1	1	2	1	21
A0A0R4IBM1			12	28.9	0.852785	1.25665	1.2036	1.40003	16	16	17	17	16	46
F1RD17		tars	12	19.6	1.37753	0.870532	1.00241	1.03021	5	5	5	5	5	29
A0A0R4IKH1			12	25.5	0.848141	0.924669	1.10349	1.06785	7	7	7	7	7	30
A0A0R4IR75			12	14.5	0.650339	0.820553	1.10889	1.14644	13	13	13	13	13	40
A0A0R4IT49		gys2	12	17.4	0.893236	0.965083	1.03177	1.11639	4	4	4	4	4	22
F1RBU6		aifm1	12	26.8	1.09151	1.02607	1.29171	1.29531	8	8	8	8	8	34
Q6NYL5	Alanine aminotransferase 2-like	gpt2l	12	30.8	1.15239	1.6657	2.09391	2.68484	12	11	12	11	11	39
A8KBV1	Succinyl-CoA:3-ketoacid-coenzyme A transferase	oxct1b	12	32.5	0.641777	1.19922	1.2729	1.63655	29	28	29	29	29	62
Q6DGK2	L-lactate dehydrogenase B-B chain	ldhbb	12	33.2	1.12832	1.00455	0.904182	1.31457	13	13	13	12	13	45
E9QH31	Aldehyde dehydrogenase	aldh3a2b	12	24.1	0.870516	0.761888	0.892027	0.902574	16	17	17	17	17	37
F1QQC5		slc27a2a	12	22.3	0.576468	1.07458	1.10522	1.26468	9	9	9	9	9	30
F1QZL6	Glucose-6-phosphate isomerase	gpia	12	24.8	0.91436	1.02	0.977779	1.06045	12	12	12	12	12	43
F1R2V0		zgc:113006	12	16.4	1.18992	1.12865	1.07416	1.34993	4	4	4	4	4	34
F1R429		lman1	12	29.4	0.683897	0.677819	0.965009	0.929014	18	16	17	19	17	47
F1R8U0		zgc:153629	12	26	0.986367	1.33589	0.963875	1.05531	6	6	6	6	6	26
F6NYT7		gpx1a	12	60.2	0.513169	1.06152	1.12439	1.2913	28	24	27	28	28	83
O42363	Apolipoprotein A-I	apoa1	12	41.6	0.756724	0.817856	0.84335	0.827449	17	17	17	17	17	51
Q5BLE8	Putative all-trans-retinol 13,14-reductase	retsat	12	19.6	0.881468	0.787186	0.918439	1.28576	19	18	18	19	19	47
Q5PRD0	14-3-3 protein beta/alpha-A	ywhaba	12	49.2	0.963503	0.885712	0.989201	1.10759	25	25	25	25	25	55
Q6AZW2	Alcohol dehydrogenase [NADP(+)] A	akr1a1a	12	31.2	0.642413	1.04257	1.17545	1.50779	6	6	6	6	6	32
Q6NYQ7		nnt	12	13.9	0.532645	1.00668	1.24181	1.40417	1	1	1	1	1	24
Q6P3G1		cp	12	12.8	1.23965	1.59026	1.07066	1.02927	13	12	13	13	13	32
Q6P5K3	60S acidic ribosomal protein P0	rplp0	12	49.7	0.715523	0.869552	1.41512	1.63436	30	26	27	30	30	67
Q6PBW7		rps19	12	66.4	0.816557	0.783923	1.04434	1.29937	22	22	22	22	22	49
Q6PHD8		pa2g4b	12	30.7	0.78708	0.909924	1.30621	1.29467	6	6	6	6	6	34
Q6TLF6	Regucalcin	rgn	12	38.3	0.903345	1.00467	1.06843	1.05951	24	24	24	24	24	50
Q7SYH6		pah	12	26.1	0.77202	1.06453	1.15566	1.30332	8	7	7	8	8	46
Q7T1D7	Dimethylaniline monooxygenase [N-oxide-forming]	fmo5	12	28	0.556197	1.14047	1.45542	1.72236	10	10	10	10	10	36
Q7T2A5	Eukaryotic translation initiation factor 3 subunit L	eif3l	12	18.9	0.80564	0.830887	0.987595	1.20877	6	6	6	6	6	24
Q7ZW04	S-adenosylmethionine synthase	mat1a	12	36.7	0.568953	0.918435	1.19309	1.40354	39	35	39	39	40	70
Q9DDU5		gstp1	12	63.9	0.705102	1.00823	1.30076	1.52887	69	66	69	70	69	138
E7EZY3	Pyruvate kinase	CABZ01066502.1	13	33.6	0.793323	0.873249	1.32002	1.69885	15	14	15	18	18	38
Q6P4V5		scp2a	13	22.9	0.391712	0.658143	1.1654	1.09931	25	24	25	25	24	51
Q08BV6		ckba	13	37.5	0.797089	0.799891	0.841595	1.05287	18	18	17	18	18	54
A0A0R4IPQ8			13	21.5	1.65086	1.44439	1.49372	1.10605	7	8	7	8	8	27
A0A0R4IQS8		atp2a2b	13	13.8	0.714859	0.865489	1.03187	1.08109	14	14	14	14	14	34
F1QAC1		iqgap2	13	9.3	1.26787	0.94481	0.918496	0.836576	3	3	3	3	3	28
F6P849	Histidine ammonia-lyase	hal	13	21.6	0.923281	0.87843	1.06543	1.00494	10	10	10	10	10	41
B0S5C5		acaa2	13	51.6	0.684282	1.36626	1.54383	2.44364	25	25	27	27	27	54
Q7ZVB2	Aldehyde dehydrogenase family 9 member A1-A	aldh9a1a	13	28.9	0.769997	0.975391	1.19871	1.28624	11	11	11	11	13	36
B8JMA6		ugt2a4	13	27.3	0.632775	0.778227	0.990388	1.09	14	14	14	14	14	45
E7FCY5		acsbg1	13	22.6	1.1704	0.988671	1.03985	1.04196	13	13	13	13	13	38
E7FGT2		h6pd	13	19	1.14178	1.06705	1.19435	1.05994	21	21	21	21	21	56
F1QAJ7		slc25a3b	13	37.9	0.60473	0.972188	0.996569	1.35703	17	17	17	17	17	47
Q1RLY6	Kynurenine 3-monooxygenase	kmo	13	28.5	0.482344	1.09349	1.0758	1.57796	15	15	15	15	15	41
F1QJC1		dhrs9	13	42.9	0.600847	0.954142	1.4056	1.81904	25	25	25	25	25	65
F1QLT9		rars	13	23.4	0.440622	0.913208	1.39925	1.49105	4	3	4	4	4	25
F1QQQ3		vtg3	13	11.3	0.964933	0.930919	1.47064	1.30079	8	8	8	8	8	34
F1QSY7		iars	13	10.3	1.05425	0.818835	1.12673	1.11774	5	5	5	5	5	23
F1R1P2		ugt1ab	13	35.4	0.556583	1.22745	1.52234	1.70116	23	22	23	24	25	71
F1R3V9	Acyl-coenzyme A oxidase	acox1	13	26.5	0.837691	0.872992	0.9613	1.13127	22	22	24	25	25	53
F1R5D5		si:ch211-133j6.3	13	34.3	0.601356	0.776906	0.812769	0.789541	4	4	4	4	4	33
F1RCA1		uba1	13	12.6	0.705316	1.02682	1.16511	1.37541	3	3	3	3	3	28
F1RDA6		ndufs1	13	23.4	0.658177	0.833378	0.997707	0.994077	8	8	8	8	8	33
Q6IQ59		uqcrc2b	13	38.3	1.17765	1.25473	1.82384	1.87775	3	3	3	3	3	22
Q6NWC3		rps2	13	50	0.570296	0.783317	1.2983	1.71628	32	33	33	33	33	73
Q7T334	Malate dehydrogenase	mdh2	13	45.1	0.809439	1.09019	1.30099	1.60494	23	23	23	23	24	65
Q7T337		fbp1b	13	43.3	0.596447	0.876751	1.42079	2.15396	26	24	25	26	26	63
Q802C9		eif4a1a	13	32.8	0.853203	0.836793	1.31387	1.30055	17	17	17	17	17	45
F1Q9I2		cyp46a2	14	33.1	0.437347	0.769122	0.955148	0.838367	6	6	6	6	6	43
A0A0R4IKF0			14	45.1	1.14896	0.730873	1.06256	1.15206	31	31	31	31	31	77
Q8AYH1		hsd17b4	14	26.2	0.857939	1.0144	1.39525	1.87651	14	9	12	15	15	53
A2CG95		acadm	14	39.9	0.875337	1.1427	1.28339	1.52894	14	14	14	14	15	45
F1Q8C3		cyp2k6	14	27.9	0.844547	0.842086	1.02223	1.18387	14	14	14	14	14	41
F1QCW3		wu:fd55e03	14	40.7	0.584443	1.06511	1.44064	1.56023	13	11	13	14	14	39
F1QKH2		dmgdh	14	18	0.832117	1.12441	0.927413	1.22226	9	9	9	9	9	34
F1R264		ephx2	14	29.4	1.05973	1.17114	1.01411	1.38463	7	7	7	7	7	34
F1R8B4		gcn1l1	14	7.2	0.728884	0.755696	0.972379	1.03937	4	4	4	4	4	24
I3IRX8		rcn3	14	42.2	0.610722	0.666206	1.51976	1.53706	29	26	28	30	30	86
Q1LVL2		aars	14	15.3	1.04905	0.697218	0.79227	0.805295	8	8	8	8	8	29
Q5BJJ2		rpl3	14	28.8	0.856213	0.847917	1.31574	1.33627	20	20	20	20	20	42
Q642H9	40S ribosomal protein S4, X isoform	rps4x	14	52.1	0.663499	0.846359	1.35681	1.5484	23	22	22	24	24	69
Q6NYL3	Peroxisomal bifunctional enzyme	ehhadh	14	23.5	0.806366	0.913431	1.07049	1.06205	11	11	11	11	11	30
Q6P2V4		hgd	14	35.9	0.761563	1.19581	1.43205	1.94191	36	38	40	41	42	128
Q6P5M3		rps9	14	53.6	0.704541	0.768083	1.12953	1.30704	25	25	25	25	25	53
Q6PC13		phb2	14	43.4	0.804938	0.959438	1.15872	1.18417	10	10	10	10	10	41
A0A0R4IN76			15	24.2	0.68841	1.16164	1.66891	1.75906	6	6	6	6	5	32
Q7ZVI7	Actin, cytoplasmic 1	actba	15	53.1	1.19195	1.04052	1.45039	1.45365	58	57	60	64	65	147
B0R171		copb2	15	19.9	0.978769	0.83818	0.969448	1.08904	12	12	12	12	12	34
B3DFN3		lmnb2	15	25.4	0.891302	1.17879	1.32372	1.09702	6	6	6	6	6	33
F1QKS4		canx	15	29.3	0.784715	0.80897	1.04363	1.07872	24	18	23	24	25	62
F1QR17		aldh7a1	15	36.6	0.894144	1.08355	1.14881	1.3252	22	19	20	21	22	70
F1QU55	Betaine--homocysteine S-methyltransferase 1	bhmt	15	51.2	0.472292	0.827368	0.709304	0.979559	31	29	30	31	33	78
Q66HV4	Coatomer subunit beta	copb1	15	17	0.61107	0.80907	1.21001	1.41159	7	7	7	7	7	22
Q6NYR0	Serine hydroxymethyltransferase	shmt1	15	30.6	0.790222	1.01044	1.22998	1.7318	23	22	21	23	23	55
Q6P5M9		tubb4b	15	43.4	0.572879	0.833816	1.60899	2.0281	30	28	29	32	30	76
Q6TLG8		rps3	15	62	0.887204	0.818123	1.12075	1.13838	35	35	36	36	37	86
Q6TNT9		gdi2	15	38.4	0.842806	0.97763	1.02408	1.20476	12	12	12	11	12	46
Q803B0		hspd1	15	32.9	1.24297	0.922317	1.20138	1.41863	13	12	12	12	13	44
Q8JHI0		slc25a5	15	43	0.598958	0.924788	1.06854	1.36945	38	38	38	38	38	92
A0A0R4IGG3	Triosephosphate isomerase B	tpi1b	16	74.7	0.6841	1.00432	1.02393	1.38399	48	46	48	48	48	82
Q5XJ10	Glyceraldehyde-3-phosphate dehydrogenase	gapdh	16	62.8	0.79351	1.06899	1.11843	1.31492	69	61	68	70	67	176
B3DFS9		myh11a	16	9.7	1.28272	0.730467	0.76739	0.535068	11	11	11	11	10	41
B8JI08		ogdha	16	15.8	0.968744	0.890723	1.04598	1.17073	9	9	8	9	9	42
E7F9N7			16	3.6	1.08678	0.946923	0.969064	0.839037	3	3	3	3	3	25
E9QCX2		grhprb	16	44.4	0.74856	0.928841	1.14642	1.64578	33	32	33	33	33	131
F1QXV8	Phosphoglycerate kinase	pgk1	16	52.3	0.864936	1.08113	1.2406	1.50295	35	32	34	34	36	92
Q0P4F7	Acyl-CoA synthetase family member 2, mitochondrial	acsf2	16	29	0.475833	0.791844	1.26756	1.4313	17	16	17	18	19	39
I3ISA3		myh10	16	10.2	0.83706	0.839528	1.25595	1.27493	2	2	2	3	2	24
F1R7F6		uggt1	16	11.6	0.938169	1.04043	1.1224	1.14118	10	10	10	10	10	37
F1R9P5		flna	16	7.8	1.04503	0.995708	0.901882	0.873129	7	7	7	7	7	26
F6P435		tpm1	16	42.3	0.945761	0.831391	0.956877	0.7878	10	10	10	10	10	43
H9GXN9		pmt	16	53.7	0.839244	0.779588	1.44509	1.68467	23	22	23	24	24	65
Q6NSN2	Amine oxidase [flavin-containing]	mao	16	34.7	0.725907	1.31655	1.35112	1.25877	16	16	16	16	16	63
Q6NWJ5		tuba8l4	16	48.2	0.67142	0.893425	1.28451	1.76924	20	20	20	19	20	66
Q6PBY1	40S ribosomal protein S3a	rps3a	16	59.2	0.670054	0.692962	1.12223	1.23091	16	16	16	16	16	59
Q6PHI8		tkt	16	31.2	0.901721	0.995937	1.03772	1.37801	23	20	22	23	23	54
Q7SYK7	Aspartate aminotransferase	got2a	16	36.4	0.745441	1.14815	1.28951	1.70598	24	24	24	24	24	57
Q98T96		cyp2ad2	16	31.9	0.580611	1.12353	1.24413	1.6163	33	33	34	34	34	71
Q6PCR7	Eukaryotic translation initiation factor 3 subunit A	eif3a	17	13.7	0.766602	0.73155	0.957358	0.959866	6	6	6	6	6	31
A0A0R4IU19			17	21	0.833934	1.47286	1.33269	1.45523	24	24	24	24	24	61
A8WGC6	ATP synthase subunit beta	atp5b	17	46.8	1.11357	1.08097	1.99457	2.69001	46	43	45	50	53	141
B0UXL2		idh1	17	38	0.819843	0.966857	1.35163	1.66644	26	25	27	27	27	81
F1QFC0		hspa9	17	26.2	1.0426	0.947847	1.26502	1.33922	14	14	14	14	14	57
F1QUW4		hyou1	17	21.4	1.38628	1.04138	1.17701	1.44943	10	10	10	10	10	48
Q6DHT4		aldh6a1	17	40.2	0.621995	1.33869	1.28497	1.58193	23	24	25	25	24	70
Q6P0S5		adh8a	17	45.4	0.663641	0.988404	1.03885	1.31186	88	86	86	87	93	193
Q7T3D9	Malate dehydrogenase	mdh1a	17	56.1	0.692846	0.967811	1.12667	1.28594	48	49	49	48	49	99
Q92005	Elongation factor 1-alpha	eef1a	17	36.8	0.651661	0.772117	1.03208	1.15834	37	37	37	37	38	92
A0A0R4IB94		pls3	18	29.6	0.913719	1.14515	1.3311	1.3696	9	9	10	10	10	40
F1Q6Z9			18	19.9	0.880545	0.972313	0.87557	1.22532	14	14	14	13	14	38
B8JMZ1		ugp2a	18	35.7	0.834316	1.11598	1.33718	1.3049	23	22	25	25	24	98
F1QV15		vtg6	18	16.5	1.22335	0.582098	1.35071	1.3436	21	21	20	21	21	60
F1R246		dars	18	34.3	0.535501	0.682384	1.06182	1.22366	10	10	10	11	11	34
I3IRW7		abat	18	42.6	0.668653	1.05115	1.54876	2.01796	33	32	32	32	32	73
Q7ZW95		rpl4	18	46.1	0.90221	0.852807	1.28531	1.58331	23	23	23	23	23	77
Q6PE26		calr	19	42.8	1.10225	0.872017	1.01952	1.01721	50	49	47	48	52	122
A7YT47		hadhaa	19	27.7	1.18872	1.23157	1.39397	1.3636	12	12	12	13	13	59
F1R7X5		suclg2	19	46.8	0.878816	1.03878	1.5902	2.26845	25	26	24	28	28	74
Q8JH71	Fructose-bisphosphate aldolase B	aldob	19	51.4	0.677639	0.917164	1.04021	1.50964	51	47	51	54	54	120
O42248	Guanine nucleotide-binding protein subunit beta-2-like 1	gnb2l1	20	73.5	0.659691	0.908791	1.05969	1.43602	25	23	24	25	25	104
Q1ECX9		pdia4	20	30.4	1.00025	1.05348	1.02437	1.15257	26	27	27	27	27	69
Q6P5L8	Hydroxysteroid dehydrogenase-like protein 2	hsdl2	20	56.4	0.97995	1.24276	1.52084	1.97861	28	28	28	28	28	69
Q804G7	Annexin	anxa4	20	62	1.01777	0.983949	1.0291	0.912471	37	37	36	38	38	85
F8W4C0		sptbn2	21	10.4	1.27292	1.16635	1.19299	1.01851	8	7	8	8	7	46
B8JLQ3		ncl	21	30.3	0.841076	0.802296	1.33867	1.28393	27	27	27	27	27	72
F1Q5K3		sardh	21	29.5	0.71104	1.29579	0.943286	1.50617	8	8	9	9	9	47
F8W4M7		aco2	21	30.3	0.863837	1.10715	1.26512	1.44576	17	16	17	17	17	80
O57521	Heat shock protein HSP 90-beta	hsp90ab1	21	33.5	0.860887	1.05652	1.22721	1.3098	31	31	29	31	31	83
Q6NYG8	Dihydropyrimidine dehydrogenase [NADP(+)]	dpyd	21	26.7	0.773938	1.00209	1.18279	1.26841	20	21	21	21	21	87
Q7ZU99	Transitional endoplasmic reticulum ATPase	vcp	21	32.1	0.744994	1.1048	1.38144	1.64642	21	21	20	21	21	60
A0A0R4IP07	Elongation factor 1-gamma	eef1g	22	42.3	0.682066	0.911914	1.23225	1.60555	32	31	33	33	33	82
A0A0R4IVV0			22	28.7	1.0265	0.827824	1.02424	0.980932	25	26	26	26	26	66
B3DKC5		lmna	22	29.7	0.762531	0.875508	0.984908	0.929571	17	17	17	17	17	58
F1QF00		pgm1	22	46.7	0.681491	1.10337	1.12912	1.33716	52	50	51	52	52	114
F1QZ40		ftcd	22	45.6	0.790014	0.925307	0.99166	1.23373	30	29	31	31	31	96
F1R889		myh9a	22	12.9	1.80217	1.182	1.27127	0.985213	4	4	4	4	4	44
Q803T5	Adenosylhomocysteinase	ahcy	22	50.8	0.867982	0.838557	0.887806	1.31225	44	43	42	45	46	135
Q9DGL6		atp1a1	22	25.6	1.12577	0.827652	1.12804	0.959688	23	22	23	23	23	77
A0A0R4IUZ2			23	47.9	0.867098	1.30057	1.54965	2.25009	41	37	41	42	42	96
F1Q6E1	4-hydroxyphenylpyruvate dioxygenase	hpda	23	56.9	0.783278	0.897381	1.13705	1.73711	60	53	61	62	62	140
F1R9W9	Delta-1-pyrroline-5-carboxylate dehydrogenase, mitochondrial	aldh4a1	23	41.4	1.06923	1.39299	1.56455	1.84939	31	31	32	33	33	79
Q6TH14	Enolase	eno3	23	58.2	0.659372	0.836789	1.25463	1.49716	43	43	43	43	44	117
A0A0R4IGN3			24	56	0.833967	0.915997	1.15371	1.42565	59	57	58	60	60	104
X1WGZ7		eprs	24	15.5	0.798528	0.723676	1.04647	0.984475	9	9	9	9	9	45
A0A0R4IMA6		mthfd1b	25	30.9	0.629136	0.958584	1.50007	1.53706	29	29	29	29	29	65
Q08BA1	ATP synthase subunit alpha	atp5a1	25	46.8	1.19827	0.882877	1.16367	1.19448	51	52	51	54	52	124
Q6P3L3		hspa5	25	44.8	1.28926	0.905416	1.20764	1.18796	57	58	57	59	59	149
A0A0R4ISX6			26	46	0.836235	0.826377	1.22781	1.2765	111	109	111	113	113	235
F1QM42		aco1	26	30.8	0.701258	0.916989	1.26696	1.50353	27	25	28	29	29	81
F1QV29		c3b	26	18	1.23306	1.653	1.22323	1.27604	10	10	10	10	10	47
F1R9Y5		pck2	26	48.9	0.862428	1.4065	1.22343	1.64546	56	57	58	58	59	136
A0A0R4IU33			27	20.1	0.809071	1.10469	1.00286	1.1078	12	14	13	13	14	67
Q7ZTS4	Keratin, type I cytoskeletal 18	krt18	27	58	0.633805	0.837666	0.955237	0.990099	57	57	58	58	57	136
A0A0R4II89			28	60.5	0.696809	0.951197	1.15394	1.49473	71	72	74	73	76	169
F1QTB5		rpn1	28	46.7	0.776239	0.933215	1.27542	1.32928	23	23	23	23	23	102
Q6P3L9	Glutamate dehydrogenase	glud1b	28	61.1	0.884659	1.312	1.28642	1.61719	85	84	86	85	88	174
F1R966		cltca	29	19	1.06836	1.07923	1.57456	2.48461	21	21	22	22	22	75
Q6NYR4	Heat shock cognate 71 kDa protein	hspa8	29	49.8	0.890168	0.898803	1.19552	1.52141	34	35	34	34	34	100
F1QYX8		hadhab	30	44.4	1.03892	0.957926	1.29139	1.44528	36	35	35	36	36	94
Q7T3L3		hsp90b1	30	39.1	1.2197	1.14729	1.29892	1.40273	57	57	55	58	57	143
Q1MTC4		vtg2	32	21.8	1.91536	0.922615	1.4437	1.49522	48	48	47	48	48	122
Q6NWF6	Keratin, type II cytoskeletal 8	krt8	32	51.3	0.667716	0.992484	0.946555	0.939875	91	87	88	90	89	176
B8JKW4		c3a	33	22	1.79957	1.66306	1.16026	1.08568	27	27	27	27	26	96
Q1LXR3		rrbp1b	34	38.2	0.552727	0.827243	1.42551	1.49343	29	28	29	32	31	94
F8W5B8	Phosphorylase	pygl	34	43.7	0.915911	1.11734	1.28834	1.57175	65	66	66	68	67	186
B8JL43		tfa	36	59.3	0.831477	1.271	1.19802	1.62294	84	81	84	84	84	213
A0A0R4IFJ4			39	35.1	0.741774	1.22546	0.966367	1.71867	44	44	44	44	45	152
F1R9Y8		hdlbp	40	31.6	0.544851	0.725628	1.35808	1.50212	48	48	48	48	48	134
I3ITN9		aldh1l1	40	43.3	0.842266	1.27147	1.37371	1.61351	96	92	97	95	96	224
Q5RGK8		snd1	41	51.9	0.734292	0.862416	1.32804	1.61356	50	50	51	52	51	161
B8A4D7		rrbp1a	42	35.1	0.43435	0.612976	1.27879	1.41633	53	51	51	53	51	115
Q6P3J5		eef2b	43	48.6	0.715338	0.807868	1.36282	1.65544	91	85	91	97	98	240
A0A0R4IJ08		spna2	49	22.7	0.844855	0.983673	1.14915	1.1584	29	28	28	29	29	114
F1QJK4		si:ch211-150d5.2	51	33.6	1.66163	1.11978	1.18121	1.21457	61	63	62	63	60	173
Q5TZ29		apobb	58	16.1	0.679813	0.918255	1.06137	0.990391	29	28	29	29	29	140
Q1LWN2		vtg1	59	45.9	1.59559	0.792069	1.68626	1.64329	116	120	118	122	120	351

## Sheet: quantified_protein list
Acession	Protein name	Gene name	# peptides	Sequence coverage [%]	0.01/VH	0.05/VH	0.5/VH	5/VH	Reporter intensity count 0	Reporter intensity count 1	Reporter intensity count 2	Reporter intensity count 3	Reporter intensity count 4	MS/MS Count
Q7SXW6	Actin-related protein 2-A	actr2a	4	10.7	1.63458	0.679019	0.279834	0.241275	1	1	1	1	1	4
E7FCV8		col6a2	4	5.4	1.25997	0.926268	0.440311	0.392074	1	1	1	1	1	4
A0A0R4IM99		tpm2	2	8.8	0.790359	0.697884	0.749887	0.408108	4	4	4	4	4	3
Q5RI57		si:ch211-240l19.8	4	41.8	1.21895	0.634306	0.483806	0.431382	1	1	1	1	1	2
E7F103		cyp2x10.2	2	4.4	0.140833	0.324312	0.354634	0.479262	2	2	2	2	2	10
B8JI17		psap	5	13.1	1.40107	0.525525	0.552609	0.484041	6	7	6	6	5	2
Q6PBX8		ndufv2	3	20.9	1.52163	0.951689	1.0391	0.486189	1	1	1	1	1	19
F1QK60		krt4	11	23.9	1.03407	1.0916	0.707926	0.508194	8	8	8	8	8	8
B8JIB4		enpep	6	7.4	1.88712	0.603999	1.30441	0.521637	3	3	3	3	3	13
Q66HW9		ctrl	3	14.6	1.29513	0.692882	0.563935	0.52741	4	4	4	4	4	3
B3DFS9		myh11a	16	9.7	1.28272	0.730467	0.76739	0.535068	11	11	11	11	10	3
Q7ZSY6	Metallothionein-2	mt2	5	85	0.263806	0.334319	0.678336	0.552348	14	13	13	13	14	6
E9QFI5		dbi	6	52.9	0.520092	0.339938	0.626781	0.556592	10	8	8	10	10	13
Q7ZW40		uso1	6	8.4	0.951199	0.921952	1.11917	0.578501	4	4	4	4	3	5
F1QIJ4		cyp2x12	8	18.1	0.491473	0.667707	0.761288	0.594404	5	5	5	5	5	11
Q6NWC1		vdac1	4	14.1	1.38202	0.687173	0.711292	0.62037	1	1	1	1	1	2
E9QEA9		nqo1	2	11.4	1.28401	0.793992	0.841068	0.641209	1	1	1	1	1	7
E7F3A5		wu:fb66f03	4	12.3	1.63447	1.06928	0.845112	0.669845	7	7	7	7	7	10
Q6AZC0		zgc:92041	6	25.9	1.13864	0.801266	0.648794	0.691333	7	7	7	6	7	10
F1RBT4		c6ast3	2	5.9	1.26836	0.803832	0.728326	0.694971	1	1	1	1	1	7
Q6JIZ2		pura	4	18.1	0.970611	0.677126	0.674366	0.70136	3	2	2	2	3	8
Q6NYV1		psmd3	7	15.9	1.2945	0.860539	0.870842	0.713046	1	1	1	1	1	16
A0A0R4IWN8			2	21.5	0.919905	0.696787	0.923	0.713361	1	1	1	1	1	7
Q6DGW4		zgc:92745	3	13.1	1.03857	1.05459	0.621901	0.714865	1	1	1	1	1	11
Q6PH75		ctsba	4	16.7	1.52965	0.696786	1.03531	0.715313	7	7	7	7	7	3
A0A0R4IAL5			6	22.6	1.14706	0.873348	0.900005	0.731196	4	4	4	4	4	6
Q9W762	Mitochondrial import inner membrane translocase subunit Tim9	timm9	2	32.1	1.1088	0.720953	0.660726	0.737636	1	1	1	1	1	13
Q6PBJ9		rplp2	4	44.3	0.85333	0.44226	0.743084	0.745448	10	10	10	10	10	12
Q9DGL3		atp1b1a	8	26.8	1.07539	0.823059	0.913319	0.748622	7	7	7	7	7	3
H0WF44	Beta-2-microglobulin	b2m	2	15.2	0.753027	0.971845	0.962004	0.750289	1	1	1	1	1	3
Q6DHN1		zgc:92203	5	10.1	0.510231	0.638613	0.904875	0.757816	2	2	2	2	2	2
Q503Y1	Glutathione peroxidase	gpx4b	6	58	1.07788	0.795287	0.853288	0.759551	2	2	2	2	2	3
B3DIV6		dlat	4	6.9	1.17027	0.994103	0.789805	0.760145	1	1	1	1	1	19
F1R6C8		ctnnd1	2	2.8	1.19633	0.948828	0.960699	0.763689	2	2	2	2	2	3
Q6P0V8	Annexin	anxa5b	6	23.3	0.616441	1.53707	1.37684	0.76665	2	2	2	2	2	3
F1QFX9		ctrb1	4	16	1.4817	0.892476	0.633766	0.772733	7	7	7	6	7	12
Q0P3U4		cox5b2	3	27	0.781697	0.651744	0.819639	0.778036	2	2	2	2	3	6
F1QNG7		npc1	3	2.4	1.16502	0.793562	0.798774	0.779758	1	1	1	1	1	6
A0A0R4IK35			3	10	1.20316	0.744055	0.761944	0.78253	1	1	1	1	1	5
Q6P5J0		amy2a	8	18.2	1.37433	1.06497	0.799902	0.783172	5	5	5	5	5	2
Q1LXJ8		zgc:109868	7	17.2	0.981288	1.42966	0.975067	0.78522	4	4	4	4	4	5
F6P435		tpm1	16	42.3	0.945761	0.831391	0.956877	0.7878	10	10	10	10	10	8
F1R5D5		si:ch211-133j6.3	13	34.3	0.601356	0.776906	0.812769	0.789541	4	4	4	4	4	3
F1RA32		epdl1	3	12.2	1.99595	1.07883	0.847327	0.790092	7	7	7	7	7	11
B8JM34	ATP synthase-coupling factor 6, mitochondrial	atp5j	5	42.2	1.19469	0.647734	0.924398	0.790672	6	6	6	6	6	4
F6P9F0		s100u	2	8.9	1.11638	1.05589	1.01383	0.794248	1	1	1	1	1	5
A0A0R4ISJ3			3	3.2	0.889948	0.8806	0.857553	0.794491	3	3	3	3	3	3
Q6PI52	Calmodulin	calm1a	5	34.2	0.840852	0.566887	0.958673	0.798709	7	7	7	8	7	11
Q5TZ85		cyp2p9	6	11.9	0.614705	0.677635	0.981556	0.799881	7	7	7	7	7	13
I3ISQ0		lgals2b	3	32	0.871555	0.965343	0.999046	0.80031	4	4	4	4	4	15
F1QVB1		ptgr1	6	17.9	1.10221	1.21833	1.16679	0.800792	4	4	4	4	4	8
B0BLX4		zgc:175088	3	28.2	0.96606	0.72764	0.821074	0.800947	3	3	3	3	3	3
Q1LVL2		aars	14	15.3	1.04905	0.697218	0.79227	0.805295	8	8	8	8	8	13
Q6DGI6	Thioredoxin	txn	6	57	1.25357	0.869657	0.870358	0.805763	15	15	15	19	19	2
Q9PUC4		psme2	4	16	0.888388	0.999228	0.914259	0.805887	5	5	5	5	5	7
F1R9Q0	Probable signal peptidase complex subunit 2	spcs2	7	30.3	0.66817	0.694379	0.792462	0.810523	5	5	5	5	5	10
F1Q8Q6		dak	8	14.4	0.640826	0.775734	0.867762	0.814494	3	2	3	3	3	5
A0A0R4IRL4			5	9.6	0.800635	0.851738	0.932959	0.814928	1	1	1	1	1	6
Q5TZ76		cyp2p6	4	5.6	0.416201	0.823005	0.820338	0.815114	6	6	6	6	6	9
Q6P026	Barrier-to-autointegration factor	banf1	4	46.7	0.81905	0.938517	1.12615	0.816001	1	1	1	1	1	5
A0A140LGK1	Plastin-2	lcp1	6	11.2	1.21471	0.970905	1.02126	0.816314	2	2	2	2	2	3
A5PN36		acot11a	2	3.3	0.936285	0.889817	0.966383	0.822095	1	1	1	1	1	7
B8JMA8		ugt2a4	4	6.4	0.441505	0.519063	0.701189	0.82574	2	2	2	2	2	9
Q6P2T5		arpc2	5	16.4	1.4296	1.34514	0.916042	0.82689	1	1	1	1	1	24
O42363	Apolipoprotein A-I	apoa1	12	41.6	0.756724	0.817856	0.84335	0.827449	17	17	17	17	17	3
F1QHR0		apoa4	7	29	0.922028	0.768784	1.1921	0.827797	6	6	6	6	5	4
B8JK19		sftpbb	4	12.3	1.77434	1.03151	1.01546	0.828489	2	2	2	2	2	18
B8A454		bag2	2	8.7	1.20714	1.06329	0.947907	0.828779	1	1	1	1	1	15
F6NPA3			2	11.9	0.979932	1.11033	0.738967	0.829615	1	1	1	1	1	8
Q6PH46	T-complex protein 1 subunit delta	cct4	4	8.3	1.33665	0.788092	0.867222	0.830545	1	1	1	1	1	13
A7MCL7		MGC174082	5	51	1.36106	0.831004	0.952719	0.833668	2	2	2	2	2	10
F1Q931		larp1b	4	4	0.905634	0.669865	0.891683	0.835934	6	6	6	6	6	5
F1QAC1		iqgap2	13	9.3	1.26787	0.94481	0.918496	0.836576	3	3	3	3	3	7
Q58EB0		zgc:110843	5	44.6	0.939602	0.820544	1.00617	0.837836	4	4	4	4	4	4
F1Q9I2		cyp46a2	14	33.1	0.437347	0.769122	0.955148	0.838367	6	6	6	6	6	15
Q5CZQ1		ywhae2	2	9	0.650632	0.634383	0.850795	0.838863	3	3	3	3	3	24
E7F9N7			16	3.6	1.08678	0.946923	0.969064	0.839037	3	3	3	3	3	3
F1QIA5		mtdha	3	8.3	0.59321	0.532185	0.665878	0.840875	3	3	3	3	3	9
A5PMC4		lman2	2	6.5	1.16636	0.931832	0.968251	0.840979	1	1	1	1	1	3
F8W2M8		tpp1	2	3.4	1.60961	1.06719	0.942084	0.845399	1	1	1	1	1	4
F1R4I7		sri	2	12.1	1.06867	1.45873	1.16698	0.847721	3	3	3	3	3	4
A7E2K4		rplp2l	6	52.6	0.54928	0.44305	0.859295	0.847909	19	18	16	19	18	10
F1QL72		ugt1ab	2	3.1	0.702405	0.840402	1.11904	0.848461	2	2	2	2	2	10
F1QPC1		cyp3c1	7	15.6	0.984461	1.26856	1.06439	0.855448	3	3	3	3	3	7
Q9PTH5		psme1	3	18.5	0.652705	1.02991	1.01534	0.856578	4	5	5	5	3	6
Q0IIQ6		aqp12	2	9.1	0.475254	0.545409	0.703271	0.858471	1	1	1	1	1	11
Q4VBV9	Omega-amidase NIT2	nit2	3	10.8	1.04179	1.16021	1.07669	0.862606	3	3	3	3	3	8
Q9PVK4	L-lactate dehydrogenase B-A chain	ldhba	4	15.6	1.00409	0.922359	0.924861	0.864066	3	3	3	3	3	2
E7F6X2		vkorc1	3	19.9	0.499278	0.879388	0.89517	0.864985	4	3	4	4	4	13
Q6P3L0	Major vault protein	mvp	2	3.8	1.29663	1.55135	1.0877	0.866423	2	2	2	2	2	5
Q6NWI7		tmed10	4	21.1	1.25865	0.795043	0.934044	0.866458	9	9	9	9	9	6
Q6NYZ0		dnajb11	6	21.1	1.12283	0.741942	0.862894	0.866792	2	2	2	2	2	5
A0A0G2KSN1			8	12.8	0.843417	1.15648	0.895254	0.868738	7	7	8	10	9	17
B8JL46		zgc:158450	6	4.1	1.33363	0.666039	0.677341	0.871363	2	2	2	2	2	20
F1R9P5		flna	16	7.8	1.04503	0.995708	0.901882	0.873129	7	7	7	7	7	5
F6PBM1		macrod1	2	9.8	1.48319	0.974344	1.01159	0.87583	1	1	1	1	1	5
A0A0R4INE8			2	12.9	0.734505	0.737467	0.868625	0.876532	1	1	1	1	1	5
Q6DH63		cox6b1	5	57	0.915943	0.604555	0.748199	0.877383	8	8	8	8	8	2
Q7T2E8		rhoac	4	15.5	0.857533	0.888013	0.85207	0.877987	3	3	3	2	3	17
Q6TEN9		cpne1	8	14.6	1.10864	0.975821	0.997696	0.879418	3	3	3	3	3	11
U3JAV8		cad	2	0.9	0.578358	0.679292	0.878835	0.880773	1	1	1	1	1	5
F1RAE2	H/ACA ribonucleoprotein complex subunit 1	gar1	2	8	1.12896	0.641204	0.924249	0.883427	2	2	2	2	2	5
Q5U369	Annexin	anxa3b	8	20	1.20111	1.03905	1.18222	0.884792	4	4	4	4	4	13
Q6NXA5		pon2	2	7	1.09711	0.82027	0.930008	0.885942	4	4	4	4	4	4
F8W5J3		hm:zeh0351	5	15.2	1.05052	1.02344	1.05875	0.885991	3	3	3	3	3	3
Q1LUX9		tbxas1	3	6.2	0.561281	0.99312	0.812031	0.887772	3	3	3	3	3	8
B3DFP9		apoa2	7	48.9	1.55684	0.885461	0.870783	0.891784	24	24	24	24	24	3
O73872	Superoxide dismutase [Cu-Zn]	sod1	10	68.8	0.801054	0.754763	0.900481	0.892111	27	26	25	27	27	10
F1REH8	Annexin	anxa13	3	10.8	0.931675	1.12224	0.939284	0.895407	1	1	1	1	1	5
B8JLJ3		ywhaz	5	18.9	0.97978	0.845706	0.931423	0.896748	3	3	3	3	3	5
Q8JFW7		bcap31	7	34.8	0.984766	0.836066	0.996523	0.897086	7	7	6	7	7	3
F2Z4T7		lman2lb	2	8.3	1.64962	1.07195	1.11582	0.899298	1	1	1	1	1	3
A0A0R4IGB1			3	4.8	0.64218	1.08089	0.927249	0.900054	4	4	4	4	4	12
F1RE17		acad11	9	11.4	0.934113	0.832942	0.956028	0.900209	6	6	6	6	6	21
F1QRF8		atad3b	2	9.5	0.87167	0.664735	0.690936	0.900685	1	1	1	1	1	16
E9QH31	Aldehyde dehydrogenase	aldh3a2b	12	24.1	0.870516	0.761888	0.892027	0.902574	16	17	17	17	17	12
Q5RH89		cmasa	3	8.3	1.31786	1.03771	1.20403	0.909385	1	1	1	1	1	14
F1QXK3	Acyl-coenzyme A oxidase	acox3	6	11.1	0.466704	0.818548	1.01367	0.909683	1	1	1	1	1	11
Q7ZUW4		arf5	4	23.9	0.880366	0.885145	0.954965	0.910578	1	1	1	1	1	5
Q7ZW75		tmed2	4	21.4	1.16917	0.892699	0.959246	0.910855	10	10	10	10	10	15
A0A140LGE1			5	13.1	0.868681	0.92116	0.837656	0.91126	4	4	4	4	4	8
Q804G7	Annexin	anxa4	20	62	1.01777	0.983949	1.0291	0.912471	37	37	36	38	38	7
F1Q4N4		ndufs2	8	21.3	0.936755	0.982282	0.960058	0.91325	2	2	2	2	2	20
Q803M8		ywhaqb	5	29.8	1.00859	0.961759	1.09002	0.915344	4	4	4	4	4	8
Q7ZUY8		pacsin3	3	9.3	1.37739	1.10676	0.912214	0.917758	3	3	3	3	3	3
Q7ZVP8	Trimeric intracellular cation channel type B	tmem38b	2	8	0.715647	0.983748	0.871734	0.918579	1	1	1	1	1	4
Q6AZC1		psmc5	6	15.8	1.09202	0.914038	0.0129147	0.919565	2	2	2	1	2	7
F1Q749		dkc1	10	17.2	1.16723	0.733518	0.943904	0.919922	6	5	6	6	6	10
Q4G5W0		rtn4a	6	24.4	0.577646	0.773604	0.970403	0.919979	9	9	9	9	9	9
B0R0D7	Coronin	coro1ca	2	3.2	1.2494	0.926551	1.06389	0.920727	1	1	1	1	1	3
E7F4T0		plecb	9	2.5	1.39625	1.10354	1.01128	0.921852	2	2	3	3	2	7
Q6PFQ2	Eukaryotic translation initiation factor 3 subunit C	eif3c	11	12.2	0.892986	0.763005	0.946527	0.922039	12	12	12	12	12	19
X1WBT0		LOC100006782	11	7.4	1.22969	1.24585	1.0737	0.925628	7	7	7	7	7	5
Q7T358		gspt1l	5	8.3	0.413341	0.680939	0.962769	0.927128	2	2	2	2	2	15
Q9I9E9		eif2s1b	10	34	0.966568	0.812989	1.06093	0.928014	9	9	9	9	9	5
F1Q8V7		tapbp	3	5.8	0.385264	0.891135	0.874214	0.928341	2	1	2	2	2	17
F1R429		lman1	12	29.4	0.683897	0.677819	0.965009	0.929014	18	16	17	19	17	4
B3DKC5		lmna	22	29.7	0.762531	0.875508	0.984908	0.929571	17	17	17	17	17	23
Q7ZZA3	Peptidyl-prolyl cis-trans isomerase	fkbp11	4	18.8	0.760539	0.601711	0.873873	0.9306	6	6	6	6	6	5
F1Q740		vars	11	10.5	0.965705	0.804414	0.974329	0.9309	3	3	3	3	3	3
Q8UW07		cyp1a	2	4	0.880548	0.961019	0.904709	0.931957	1	1	1	1	1	4
Q6TNU6	Dihydrolipoyl dehydrogenase	dldh	9	20.7	0.982772	0.964875	0.909046	0.933139	4	4	4	4	4	7
F1R1T5		zgc:136472	2	3.5	1.14882	0.808389	0.98481	0.935617	1	1	1	1	1	6
A5WVL6		ctsl1a	5	24.9	1.53144	1.05573	0.8909	0.939406	2	6	4	4	4	7
A8E7G9		si:ch211-117n7.7	2	7.2	0.792886	0.841732	1.09572	0.939425	2	2	2	2	2	3
Q7ZUI5	Nucleoside diphosphate kinase	nme4	7	38.9	1.31133	1.25159	0.754815	0.93983	8	8	8	8	8	10
Q6NWF6	Keratin, type II cytoskeletal 8	krt8	32	51.3	0.667716	0.992484	0.946555	0.939875	91	87	88	90	89	8
Q7SXA3		rps27a	5	42.3	0.864358	0.760342	0.955246	0.941861	9	9	10	10	10	6
A0A0R4I9A0	Adipocyte plasma membrane-associated protein	apmap	12	31.3	0.94824	0.82927	0.909583	0.942634	9	9	9	9	9	3
B8JLC8		si:ch73-131e21.5	6	32.8	0.951048	0.867794	0.952233	0.942662	6	6	6	6	6	4
F1QDJ9	Signal recognition particle subunit SRP72	srp72	6	11.1	0.801824	0.829832	1.00416	0.943199	3	3	3	3	3	2
A3KMS9		prkacaa	2	7.4	0.880906	1.02055	1.11291	0.945745	1	1	1	1	1	6
A0A0R4IU44			2	2.1	1.51618	1.59082	1.03893	0.949316	1	1	1	1	1	18
Q7T3H5		gpd1c	6	24.4	0.907979	1.24271	1.09797	0.950445	5	5	5	5	5	32
F1QHC4		lmnb1	7	16.3	0.68029	1.00099	1.16299	0.950978	1	1	1	1	1	5
Q68FN4		ppm1ba	3	6.7	0.728463	1.04948	0.802443	0.950986	1	1	1	1	1	9
Q504B1		sub1a	2	19.5	1.20219	1.09804	1.32853	0.952411	3	3	3	3	3	4
Q8UVG7		fabp3	9	51.1	0.533525	0.706181	0.860475	0.952866	18	17	18	18	18	8
Q6YBS2	Adenylyl cyclase-associated protein	cap1	6	13.8	0.919891	1.25408	1.16146	0.954663	3	3	3	3	3	5
F1QG53		ugt2b1	4	8	0.756737	0.933698	1.28463	0.954719	2	2	2	2	2	5
Z4YIG5	Ras-related protein Rap-1b	rap1b	3	18.5	0.934323	0.955189	1.02339	0.957872	5	5	5	5	5	6
A0A0R4IT72			5	6.4	0.943883	1.38629	0.823539	0.959468	5	4	5	5	5	9
F1Q9N0		si:ch211-235o23.2	4	21.7	1.77725	1.15551	0.80763	0.959601	5	5	5	5	5	4
Q9DGL6		atp1a1	22	25.6	1.12577	0.827652	1.12804	0.959688	23	22	23	23	23	5
Q6PCR7	Eukaryotic translation initiation factor 3 subunit A	eif3a	17	13.7	0.766602	0.73155	0.957358	0.959866	6	6	6	6	6	12
A0A0R4IVT5			4	17.5	0.945833	0.684583	0.931806	0.961065	21	20	21	21	21	6
F1QDA6		zgc:101071	7	11	0.514432	0.599569	1.06724	0.963555	6	6	6	6	6	7
Q6NY81		ehd1a	3	6	0.905017	0.881155	1.06569	0.963722	2	2	2	2	2	6
X1WD71			8	7.5	1.21843	0.881451	0.889688	0.963872	1	1	1	1	1	15
E7F238		CABZ01059390.1	3	19.7	0.442029	0.856612	0.618057	0.964781	1	1	1	1	1	4
Q6P0I2	Proteasome subunit alpha type	psma8	6	29.1	1.00307	1.01854	0.979889	0.965462	6	4	6	6	6	16
Q6PBK3	40S ribosomal protein S28	rps28	3	46.4	0.612206	0.525446	0.945945	0.966281	4	4	4	4	4	12
F1QC05		ephx1	11	25.7	0.75845	0.988986	1.01092	0.966502	12	12	12	12	12	16
F1Q6S1		npepl1	5	11.2	1.31492	1.01024	1.10473	0.968038	6	6	6	6	6	12
A2BF91		zgc:101858	2	7.5	0.690205	0.734811	1.00236	0.968259	2	2	2	2	2	4
Q4V918	Proteasome subunit alpha type	psma3	4	17.6	0.876871	0.960912	1.1438	0.968587	2	2	2	2	2	4
Q6QA33	Estradiol 17-beta-dehydrogenase 12-B	hsd17b12b	8	26.4	0.779406	0.769397	1.04699	0.970131	7	7	7	7	7	11
E9QFI0		tceb2	2	20.2	1.04388	0.892683	0.990799	0.970362	1	1	1	1	1	11
Q1L872		sult3st3	7	29.8	0.470066	0.734155	1.32603	0.970485	5	5	5	5	5	11
F1Q4X1		col6a3	4	1.3	0.949325	1.00897	1.0441	0.97086	1	1	1	1	1	6
Q90ZM2	Protein transport protein Sec61 subunit alpha-like 1	sec61al1	8	15.1	0.637127	0.757849	0.910089	0.971096	20	20	20	20	20	10
X1WEJ6			8	8	1.10888	0.919678	1.10356	0.971444	7	7	7	7	7	4
Q6DGX8	Proteasome subunit alpha type	psma1	10	46.2	1.00682	1.06535	1.16622	0.972784	7	7	7	7	7	6
F1QEB3			4	29.6	1.18617	1.01444	0.926026	0.97487	2	3	2	4	3	7
A5PMZ3		scinlb	2	3.6	1.45192	1.47959	1.16227	0.975344	1	1	1	1	1	5
F6NHB2			4	13.9	0.888698	0.999484	1.01071	0.975732	6	6	6	6	6	4
F1QU55	Betaine--homocysteine S-methyltransferase 1	bhmt	15	51.2	0.472292	0.827368	0.709304	0.979559	31	29	30	31	33	5
Q6VN46	Myoglobin	mb	3	23.1	2.66925	0.86569	0.992865	0.979856	5	5	5	5	5	4
A0A0R4IVV0			22	28.7	1.0265	0.827824	1.02424	0.980932	25	26	26	26	26	12
F1R2W1		dhrs13a.3	3	8.8	0.804703	1.03153	1.02906	0.981297	2	2	2	2	2	5
F1RB68		zgc:103559	5	9.8	0.751645	0.985763	0.977899	0.9816	4	4	4	4	4	7
Q6AZA2		ndufv1	2	4.1	0.718252	0.871805	0.94111	0.981792	2	2	2	2	2	12
Q4VBI5	NADH dehydrogenase [ubiquinone] 1 alpha subcomplex subunit 2	ndufa2	4	42.6	0.678678	0.806866	0.806431	0.98195	1	1	1	1	1	4
A0A140LGS5			3	1.8	1.52801	1.26388	1.23965	0.984117	1	1	1	1	1	10
A4IG53		comtb	2	11	0.788126	0.942691	1.28907	0.984333	3	3	3	3	3	3
X1WGZ7		eprs	24	15.5	0.798528	0.723676	1.04647	0.984475	9	9	9	9	9	8
Q6DGJ3	Mitochondrial import inner membrane translocase subunit Tim13	timm13	2	26.3	1.04645	0.89419	0.972766	0.985174	2	2	2	2	2	9
F1R889		myh9a	22	12.9	1.80217	1.182	1.27127	0.985213	4	4	4	4	4	21
Q6IVM1		rbp2b	8	55.6	1.29073	1.04078	0.894421	0.986336	10	10	10	10	10	9
A0A140LH20			3	12.8	1.29387	0.772237	1.15826	0.986664	3	4	3	4	4	5
F1QRW4		pitpnb	5	22.8	0.707544	0.763182	0.997717	0.986704	1	1	1	1	1	18
Q6AXJ2	Eukaryotic translation initiation factor 3 subunit H-A	eif3ha	5	19.7	0.621477	0.864594	1.03906	0.98717	2	2	2	2	2	4
F1QB21		decr1	9	34.5	0.954938	1.0405	0.928976	0.987331	18	18	17	17	17	13
Q24JW2		lyz	3	21.9	1.32864	2.68677	1.04322	0.989087	4	4	4	4	4	8
Q5U373		cab39l	2	5.1	0.857318	0.90248	0.976079	0.989398	1	1	1	1	1	2
Q7ZTS4	Keratin, type I cytoskeletal 18	krt18	27	58	0.633805	0.837666	0.955237	0.990099	57	57	58	58	57	2
Q5TZ29		apobb	58	16.1	0.679813	0.918255	1.06137	0.990391	29	28	29	29	29	9
A0A0G2KZA4			4	7.2	0.987328	1.03383	1.11643	0.99083	1	1	1	1	1	12
F1RDA6		ndufs1	13	23.4	0.658177	0.833378	0.997707	0.994077	8	8	8	8	8	7
A3KPS7		ugt5c2	8	14.3	0.413663	0.943868	0.914783	0.994808	15	15	15	15	15	8
B8JI15		rpia	2	5.5	1.01516	0.892726	1.16865	0.994831	1	1	1	1	1	15
Q7ZWA9		eif5	6	17.2	0.961994	0.831649	0.975053	0.995542	4	4	4	4	4	9
Q6DH65	Density-regulated protein	denr	2	8.2	0.6045	0.509545	1.10858	0.996876	1	1	1	1	1	8
A1L1W9	Monocarboxylate transporter 10	slc16a10	2	3.6	0.694539	1.23894	0.757366	0.99692	1	1	1	1	1	5
A2VD36		si:dkey-98p3.7	6	26.9	1.04466	0.682241	1.02501	0.998932	2	2	2	2	2	6
B3DKM3		tmed3	2	10.7	0.913025	0.789254	1.05554	1.00035	1	1	1	1	1	3
Q7ZU89		arcn1b	6	10.4	0.786764	0.770023	0.93412	1.00048	3	3	3	3	3	2
A8E7G6		prdx3	4	15.7	0.983305	0.952089	0.941606	1.00241	6	6	6	6	6	8
F1QPC3	Store-operated calcium entry-associated regulatory factor	tmem66	3	11	0.797317	0.905542	1.02951	1.00313	1	1	1	1	1	15
A3KPS8		ugt5c3	4	7.9	0.537098	0.862396	1.12868	1.00334	5	5	5	5	5	11
Q5U3E1		rab11a	5	19.5	0.852052	0.988969	1.11001	1.00352	1	1	1	1	1	6
Q7ZTI0		ssb	6	19	0.653422	0.738315	1.18534	1.00382	4	4	4	4	4	5
Q6PHG2	Hemopexin	hpx	2	3.6	1.67246	1.04435	0.79122	1.00469	2	2	2	2	2	16
F6P849	Histidine ammonia-lyase	hal	13	21.6	0.923281	0.87843	1.06543	1.00494	10	10	10	10	10	3
Q6P963	Hydroxyacylglutathione hydrolase, mitochondrial	hagh	6	20.1	1.13105	1.00457	1.04976	1.00893	2	2	2	2	2	8
F1QJL0		chia.6	2	5.8	1.14163	1.38705	0.870871	1.00959	2	2	2	2	2	18
Q803M1		tpm3	5	18.1	1.35626	1.09887	1.13448	1.01042	3	3	3	3	3	3
Q05AJ2		mettl7a	5	24	0.356637	0.816988	0.684883	1.01222	7	7	7	7	6	3
Q6DGP6		sub1b	4	38.7	0.881835	0.983353	1.06915	1.01266	5	5	5	5	5	11
F1Q911		zgc:64106	6	24.5	0.57848	1.75679	1.32715	1.01648	4	4	8	8	8	13
E9QFU6		LOC100333275	4	18.6	0.473533	1.04597	1.28152	1.01668	3	3	3	3	3	14
Q6PE26		calr	19	42.8	1.10225	0.872017	1.01952	1.01721	50	49	47	48	52	11
Q7ZV77	Proteasome subunit alpha type	psma4	4	13.8	0.83426	1.0294	1.06612	1.01722	6	6	6	6	6	6
A7MCR1	Cytochrome b-c1 complex subunit Rieske, mitochondrial	uqcrfs1	5	17.2	0.774878	1.05167	0.89327	1.01736	1	1	1	1	1	2
Q6NYS4		pebp1	2	10.2	0.649744	0.972311	1.13654	1.01768	4	4	4	4	4	25
F8W4C0		sptbn2	21	10.4	1.27292	1.16635	1.19299	1.01851	8	7	8	8	7	6
F1R0C4		zgc:171674	8	25.8	0.812906	0.841492	1.09061	1.01899	5	5	5	5	5	15
E7FE90		fetub	3	8	0.892228	0.921391	0.931375	1.02065	4	3	4	4	4	2
Q6P102		ywhabl	7	35.1	1.08693	0.909107	1.05549	1.02261	6	6	6	6	6	18
A0A0R4IT32		sult2st1	5	13.9	0.973945	0.794754	1.1496	1.02385	1	1	1	1	1	18
Q7ZU42	Obg-like ATPase 1	ola1	10	27.5	1.10802	0.892789	1.03575	1.02544	5	5	5	5	5	3
Q6PC53	Peptidyl-prolyl cis-trans isomerase	ppiab	5	28.7	0.879087	0.991895	1.13922	1.02564	16	15	16	17	17	5
Q1LUZ9		ces3	4	7.8	1.01516	1.2908	1.12485	1.02593	2	2	2	2	2	14
F1Q9K6	Sulfurtransferase	zgc:162544	4	11.7	1.15161	1.30674	0.896161	1.02602	3	3	3	3	3	3
A0A0R4IQY2			9	21.1	1.22625	1.08611	1.06999	1.02647	1	1	1	1	1	10
F1QAF6		ugt1ab	3	7	0.471631	0.617315	0.83847	1.02695	1	1	1	1	1	3
Q6P3G1		cp	12	12.8	1.23965	1.59026	1.07066	1.02927	13	12	13	13	13	10
F1RD17		tars	12	19.6	1.37753	0.870532	1.00241	1.03021	5	5	5	5	5	10
Q499A2		plgrkt	2	15.4	0.71497	1.07583	1.12474	1.03046	2	2	2	2	2	9
F1QB54		pabpc1a	9	13.7	0.598276	0.752323	1.0913	1.03091	4	3	3	4	4	7
A0A0R4IKM7	Lysine--tRNA ligase	kars	11	23.4	0.982825	0.835522	1.16775	1.03268	6	6	6	6	6	7
A0A0R4IPV1			4	13.6	1.2127	0.919647	0.999391	1.03275	2	2	2	2	2	14
B0V2R7		serping1	2	2.8	1.43788	1.34234	1.00029	1.03386	1	1	1	1	1	3
Q7T340		drg1	3	10.4	0.795908	0.88192	0.958091	1.03494	3	3	3	3	3	5
Q6PBP3	Redox-regulatory protein FAM213A	fam213a	3	16.5	1.11954	0.96925	1.26895	1.0364	1	1	1	1	1	10
F1RCK7		rbks	4	13.5	0.83456	0.942084	1.01078	1.03853	3	3	3	3	3	4
Q8AWD0		vdac2	11	44.9	1.40308	0.963001	0.950016	1.03913	23	22	22	21	22	8
F1R8B4		gcn1l1	14	7.2	0.728884	0.755696	0.972379	1.03937	4	4	4	4	4	16
B0V1K1		aimp1	6	24.8	0.761418	0.713314	1.00621	1.03987	8	8	8	8	8	9
F6NLI6			11	52.4	0.615365	0.767339	0.946589	1.04083	26	26	26	27	27	4
B8JIS5		gstm3	2	9.6	1.10648	1.22204	1.20957	1.0411	2	2	2	2	2	6
A0A0R4ICM4			4	5.7	1.22412	0.899512	1.07884	1.04154	1	1	1	1	1	6
E7FCY5		acsbg1	13	22.6	1.1704	0.988671	1.03985	1.04196	13	13	13	13	13	5
Q7T356	14-3-3 protein beta/alpha-B	ywhabb	5	24.8	1.02411	0.834125	1.09827	1.04225	6	7	7	7	7	4
B8A4C4		mogs	9	12.1	0.561638	0.680611	0.932292	1.04225	3	3	3	3	3	9
F1QFP1		copz1	2	10.6	1.15858	0.921688	1.19389	1.04324	2	2	2	2	2	3
A0A0R4IF47		ctnna1	10	13.1	1.14476	0.956908	1.07965	1.04413	4	4	4	4	4	4
Q6DHK1	NAD(P)H-hydrate epimerase	apoa1bp	6	27.2	0.863329	1.0532	1.06388	1.04484	1	1	1	1	1	6
Q8AW60		ivd	10	23.7	0.924359	1.03401	0.944018	1.04559	12	12	12	12	12	21
Q7ZUD6		rtn3	3	13.6	0.740494	1.01245	0.898153	1.04626	7	7	7	7	7	5
E9QFD8		vtg4	6	7.6	1.64894	0.634594	1.27033	1.04626	3	3	3	3	3	4
Q6PH44		bsg	3	17.1	1.7781	1.03095	1.14725	1.04659	5	5	5	5	5	8
Q7SXM1		cox6b2	4	53.5	0.571274	0.651719	0.434895	1.04761	6	6	6	6	6	5
Q6PC12	Enolase	eno1a	3	9.3	0.65488	0.960584	0.989214	1.04797	6	6	6	6	6	11
A0A0R4IH35			4	6.2	1.08924	1.18123	1.20448	1.05049	3	3	3	3	3	21
F6NMD4		si:ch211-288g17.4	6	12.9	1.22445	1.06267	0.995227	1.0524	1	1	1	1	1	5
Q08BV6		ckba	13	37.5	0.797089	0.799891	0.841595	1.05287	18	18	17	18	18	5
F1QIJ9		cyp8b1	6	14.4	0.878803	1.167	1.01392	1.05311	4	4	4	4	4	9
A0A0R4IQN8	Nascent polypeptide-associated complex subunit alpha	naca	2	2	0.92597	0.868728	0.964986	1.0536	5	5	5	5	5	7
F1R293		adsl	2	3.9	0.990719	0.848073	1.10345	1.05391	1	1	1	1	1	11
Q6DH80		lygl1	3	21.4	1.05136	1.22146	0.969659	1.0549	3	3	3	3	3	9
Z4YIM6	Eukaryotic translation initiation factor 3 subunit D	eif3d	6	17.8	0.98106	0.849551	1.04392	1.05495	4	3	5	5	5	8
F1R8U0		zgc:153629	12	26	0.986367	1.33589	0.963875	1.05531	6	6	6	6	6	9
A0A0R4J8E6		prpf8	6	3.1	1.03787	0.894633	0.979868	1.05569	2	2	2	2	2	11
Q7T2J4		adh8b	9	22.3	0.789868	0.945668	0.97174	1.05591	5	6	7	6	6	4
F1Q883	6-phosphogluconate dehydrogenase, decarboxylating	pgd	6	13.9	0.970129	1.04214	0.982706	1.05807	5	5	5	5	5	9
Q6DH69	Fatty-acid amide hydrolase 2-A	faah2a	2	8.6	1.23571	1.26468	1.4495	1.05851	1	2	2	3	2	3
F8W4J1		si:ch73-103b2.3	6	36.6	1.04832	0.997625	1.01268	1.05883	12	12	12	12	12	11
Q6TLF6	Regucalcin	rgn	12	38.3	0.903345	1.00467	1.06843	1.05951	24	24	24	24	24	3
A2AWA1		ddx39aa	9	17.8	0.942539	0.776936	0.977649	1.05962	2	2	2	2	2	8
E7FGT2		h6pd	13	19	1.14178	1.06705	1.19435	1.05994	21	21	21	21	21	17
F1QZL6	Glucose-6-phosphate isomerase	gpia	12	24.8	0.91436	1.02	0.977779	1.06045	12	12	12	12	12	7
Q6NWG1	Leucine-rich repeat-containing protein 59	lrrc59	7	20.7	0.936699	0.719427	0.977797	1.06073	5	5	5	5	5	6
A0JMQ6		cyp4v8	6	12.5	0.454144	1.00498	1.05431	1.0608	3	3	3	3	3	24
Q6NYL3	Peroxisomal bifunctional enzyme	ehhadh	14	23.5	0.806366	0.913431	1.07049	1.06205	11	11	11	11	11	9
F1R9Y9		etfb	9	40.9	0.543025	0.778463	0.87472	1.0627	8	8	8	8	8	5
Q6NX06		nucb2b	3	7.2	1.07872	0.959469	0.959197	1.06309	2	2	2	2	2	7
B3DGI9		timm8b	3	30.5	0.526789	0.865621	0.888281	1.06366	2	2	2	2	2	3
F6P3G4	26S proteasome non-ATPase regulatory subunit 11A	psmd11a	5	13.3	1.26263	1.16098	1.07568	1.06383	4	4	4	4	4	8
A0A0R4IZB1	Poly(U)-binding-splicing factor PUF60-B	puf60b	2	6	1.1639	1.05755	1.37814	1.06417	2	2	2	2	2	4
F1QSP8		prdx4	8	39.6	0.812782	1.06093	0.874388	1.06433	2	2	2	2	2	7
Q6PBQ4		rtn1a	5	23.6	0.48116	0.565907	0.951122	1.06673	17	17	17	17	17	10
A8WGN9	Lipase	lipf	3	8.1	0.971694	0.95621	0.995635	1.0678	1	1	1	1	1	19
A0A0R4IKH1			12	25.5	0.848141	0.924669	1.10349	1.06785	7	7	7	7	7	18
Q6P0U6		dnajc3	8	16.1	0.716558	0.796663	1.02128	1.0712	4	4	4	4	4	7
F1R454		ca2	3	11.5	0.875274	0.882959	0.760921	1.07352	1	1	1	1	1	6
Q5U3U3	Carnitine O-palmitoyltransferase 2, mitochondrial	cpt2	10	17.6	0.918167	1.06502	1.01233	1.07394	6	5	5	6	6	11
A0A0J9YIW4	Trans-1,2-dihydrobenzene-1,2-diol dehydrogenase	dhdh	6	19.7	0.8271	0.907438	0.924159	1.07442	3	3	3	3	3	3
Q98874	Enhancer of rudimentary homolog	erh	3	24	0.419933	0.702468	1.1653	1.07457	1	1	1	1	1	14
Q6NY77	Probable 4-hydroxy-2-oxoglutarate aldolase, mitochondrial	zgc:77082	7	17.9	0.678222	1.13564	0.997234	1.07524	1	1	1	1	1	14
A0A0R4IL29			10	30.9	1.11471	0.908147	1.13787	1.07615	16	17	15	17	16	18
Q1LVK8		sec11a	5	20.1	0.990126	0.926124	1.26329	1.07622	2	2	2	2	2	12
F1QSM3		cyp2x7	2	4.1	0.565039	1.26111	0.532998	1.07668	1	1	1	1	1	7
A0A0G2L2Q2			3	50	1.10756	0.969169	1.00597	1.07849	10	10	10	10	10	8
F1QKS4		canx	15	29.3	0.784715	0.80897	1.04363	1.07872	24	18	23	24	25	12
Q9MIX8	Cytochrome b	mt-cyb	2	5	0.44841	0.753151	0.800359	1.0788	1	1	1	1	1	10
Q7ZV92		prp19	2	5.1	0.703208	0.86391	0.955442	1.07917	3	3	3	3	3	14
A0A0R4IQS8		atp2a2b	13	13.8	0.714859	0.865489	1.03187	1.08109	14	14	14	14	14	18
Q803H5	Guanine nucleotide-binding protein G(I)/G(S)/G(T) subunit beta-1	gnb1b	5	17.4	1.42429	1.04515	1.07871	1.08126	7	7	7	7	7	5
F1QCD4	Aspartate aminotransferase	got2b	3	6.5	1.08786	0.938589	1.06401	1.08222	1	1	1	1	1	3
B8A565		c9	4	5.6	1.12219	1.47272	1.04705	1.08306	3	3	3	3	3	6
X1WET9		eif3bb	7	12.8	0.92391	0.882397	1.11067	1.08375	3	4	4	4	4	10
E7FFZ8		pon3	10	29.2	0.832545	0.765553	1.09998	1.08426	19	19	19	19	19	3
B8JKW4		c3a	33	22	1.79957	1.66306	1.16026	1.08568	27	27	27	27	26	9
F1QKH9		rdh1	11	35.8	0.691159	0.791443	0.953705	1.086	27	27	27	27	27	14
Q6PC69	60S ribosomal protein L10a	rpl10a	10	40.3	0.862379	0.782645	1.06615	1.08609	20	17	19	19	21	11
E9QJJ5	Proteasomal ubiquitin receptor ADRM1	adrm1	3	7.8	1.12828	1.03618	1.02186	1.08623	3	3	3	3	3	3
B3DIZ3		zgc:171967	9	10.6	0.969597	0.928605	1.0072	1.08673	10	10	10	10	10	3
B8JL82		ssr3	4	17.7	0.778252	0.696413	1.02871	1.08742	13	13	13	12	12	16
Q803E5		etf1	10	24.9	0.974575	0.866321	1.14861	1.08899	4	4	4	4	4	19
B0R171		copb2	15	19.9	0.978769	0.83818	0.969448	1.08904	12	12	12	12	12	5
B8JMA6		ugt2a4	13	27.3	0.632775	0.778227	0.990388	1.09	14	14	14	14	14	9
A0A0R4IEP1	Protein canopy-1	cnpy1	3	19.7	0.763879	0.790185	1.07359	1.09032	3	3	3	3	3	20
Q6IQB1		rpl5b	11	32.4	1.01531	0.86645	1.16737	1.09177	13	13	13	14	14	12
Q561X9	3-hydroxybutyrate dehydrogenase type 2	bdh2	6	26.1	0.780943	0.925813	1.00884	1.09201	7	7	7	7	7	10
Q7SYD0		cbr1	5	19.9	0.75838	0.950089	1.0538	1.09252	5	5	5	5	5	18
F1R2S5		vtg5	4	3.5	1.84794	0.65205	1.276	1.0927	4	4	3	4	4	17
E7F6F7		abcb7	3	5.9	0.817628	1.01671	1.01225	1.09297	3	3	3	3	3	12
F1Q4S6		nol6	2	1.8	1.32801	1.0023	1.38293	1.0931	1	1	1	1	1	13
B0V0X1		pccb	10	22.3	0.892	1.10574	1.16522	1.09316	7	7	7	7	7	7
B8JKP3	Probable thiopurine S-methyltransferase	zgc:109981	6	33.3	0.969911	1.10097	1.13694	1.09342	1	1	1	1	1	5
Q802Z5		nono	2	5.2	1.07581	0.968094	1.08108	1.09363	1	1	1	1	1	9
F1Q8W8		calrl2	9	30.5	1.2316	0.959263	1.13242	1.0947	7	7	7	8	7	27
F1R4U6		si:ch211-14a17.10	11	10.2	1.31952	1.63836	1.92585	1.09502	6	6	6	6	6	3
F1QGG3		nsfb	6	7.6	0.851968	1.00112	1.08083	1.0961	2	2	2	2	2	6
B3DFN3		lmnb2	15	25.4	0.891302	1.17879	1.32372	1.09702	6	6	6	6	6	5
H9GX78			11	28.6	0.940171	1.01011	1.02812	1.09705	11	11	11	11	11	9
Q6ZM50		capza1b	4	22.4	1.0617	0.995349	1.07742	1.09723	5	5	5	5	5	15
A8WFT4		scly	4	10	0.973583	0.941003	1.00852	1.09744	2	2	2	2	2	8
Q7SZ49		sdr16c5b	11	33.3	0.543968	0.940289	1.09306	1.09856	15	15	15	15	15	8
Q6P4V5		scp2a	13	22.9	0.391712	0.658143	1.1654	1.09931	25	24	25	25	24	4
A0A0R4IZC7			6	5.2	1.21609	1.02243	1.08041	1.09934	3	3	3	3	3	13
A8KB43		cbln8	2	8	2.18403	1.08924	1.04375	1.10043	1	1	1	1	1	4
Q7ZVG7		fgg	10	23.4	1.05518	1.07113	1.24188	1.10047	4	4	4	4	5	14
Q1LYB6	ATPase inhibitor B, mitochondrial	atpif1b	4	33.6	0.870216	0.914107	1.08483	1.10047	2	2	2	2	2	11
A0A0R4IQE9			3	6.5	0.915358	1.15233	0.889155	1.10092	2	2	2	2	2	5
F1QEB4		ssrp1a	3	4.3	1.02114	1.02866	1.1304	1.10105	1	1	1	1	1	14
A0A0R4IBQ0		ctsd	6	20.4	1.80745	1.23666	1.09369	1.10248	4	4	4	4	4	12
F1R3J9		prmt1	7	23	1.32623	0.793529	1.0506	1.10424	4	4	4	4	4	26
Q6PFS4		immt	11	16.1	0.853428	0.84581	1.29533	1.10538	4	4	4	4	4	13
Q6NWK3		ranbp1	4	22.7	0.305152	0.574923	1.2159	1.10553	4	3	4	4	4	22
A0A0R4IPQ8			13	21.5	1.65086	1.44439	1.49372	1.10605	7	8	7	8	8	16
A9C3P0	Malectin	mlec	9	27	0.855295	0.861901	1.11818	1.10644	7	7	7	7	7	20
Q5PRD0	14-3-3 protein beta/alpha-A	ywhaba	12	49.2	0.963503	0.885712	0.989201	1.10759	25	25	25	25	25	4
A0A0R4IU33			27	20.1	0.809071	1.10469	1.00286	1.1078	12	14	13	13	14	15
F1QTN8		LOC559236	2	5.7	0.891441	0.468503	1.45705	1.10826	1	1	1	2	1	10
Q7SXP1		capzb	5	19.4	1.01119	1.01838	1.05394	1.10876	2	2	2	2	2	17
Q7T390		tecrb	5	14.6	0.569217	0.89776	1.24461	1.1089	7	6	7	7	7	8
Q0P3Z2	Phosphotriesterase-related protein	pter	4	11.5	1.00072	1.04342	1.0757	1.10912	2	2	2	2	2	6
Q58EG2	Erlin-1	erlin1	11	33.6	0.568116	0.875187	0.921427	1.10998	16	17	17	17	17	12
Q803G5	Sorting and assembly machinery component 50 homolog A	samm50a	3	5.5	0.77017	0.8249	0.907584	1.11011	1	1	1	1	1	12
Q803J3		rab2a	3	14.6	0.898893	0.981007	0.956408	1.1126	2	2	2	2	2	6
B8A5D3		nars	9	16.5	0.849229	0.663529	1.10251	1.11272	15	15	15	15	15	14
Q503E6		ezra	8	13.1	1.1721	1.182	0.948209	1.11369	2	2	2	2	2	12
Q6NV32	Prothymosin alpha-A	ptmaa	2	22.9	0.810286	0.922401	1.1395	1.11427	3	3	3	3	3	7
F1RBS6		nme2b.2	7	39.9	0.853224	0.820097	1.01508	1.11541	13	13	13	13	13	5
A0A0R4IT49		gys2	12	17.4	0.893236	0.965083	1.03177	1.11639	4	4	4	4	4	11
Q6NW62		khdrbs1b	3	10.5	0.783642	0.873552	0.988486	1.1177	3	2	3	3	3	6
F1QSY7		iars	13	10.3	1.05425	0.818835	1.12673	1.11774	5	5	5	5	5	2
A0A0R4IVC3		rbp4	2	14.2	1.56064	1.16021	1.36194	1.11942	1	1	1	1	1	10
F1R4C8		ndufs3	7	28.6	0.576047	0.798743	1.05539	1.11966	4	4	4	4	4	4
F1RAM4		zgc:110339	5	20	0.591384	1.42422	0.959882	1.12197	5	5	5	5	5	14
B8A5Q1		cyp2u1	8	18.9	0.789138	0.918835	1.266	1.12469	3	3	3	3	3	25
Q6P5K6		slc25a20	4	12.7	0.607673	0.940007	1.14166	1.12576	7	7	7	7	7	10
Q5RHB8	Branched-chain-amino-acid aminotransferase	bcat1	2	6.5	0.856295	0.714936	1.02035	1.12715	1	1	1	1	1	5
A0A0R4ITL8			2	13.6	0.772597	1.01441	1.22062	1.12735	2	2	2	2	2	14
Q92051	Carbonic anhydrase	cahz	5	22.7	1.15333	0.934927	1.09606	1.12782	6	6	6	6	6	19
Q9PUL9		mtch2	3	13.7	0.616228	1.27453	1.2212	1.12807	1	1	1	1	1	5
F1R6V6		rab14	3	20.8	0.991044	1.02292	1.10946	1.12844	1	1	1	1	1	8
Q5TYZ5		cand1	11	9.3	0.623959	0.839196	0.94265	1.12891	2	2	2	2	2	11
F6P055		acaca	8	4.5	0.645802	0.891762	1.00134	1.12906	2	2	2	2	2	24
A2BGT2		dao.2	4	13.2	0.769429	0.736973	0.910468	1.12931	4	4	4	4	4	17
Q6P603	Annexin	anxa2a	5	17.5	0.95004	1.51888	1.15852	1.12958	2	2	2	2	2	14
F1R8U1		mospd2	4	7.6	0.995771	1.0617	1.26546	1.13117	1	1	1	1	1	19
F1R3V9	Acyl-coenzyme A oxidase	acox1	13	26.5	0.837691	0.872992	0.9613	1.13127	22	22	24	25	25	3
Q7ZW20		ywhae1	7	27.8	0.914089	0.970965	1.15288	1.13245	7	7	7	7	7	13
F1QG80		rpl22	3	27	0.803361	0.786825	1.05113	1.13261	4	4	4	4	4	7
F1R0C2		si:ch211-127i16.2	5	10.4	0.611919	0.733724	0.549832	1.13303	5	5	5	5	5	12
B8A4B0		glud1a	8	18.8	1.34226	1.37392	1.20738	1.13385	8	8	8	8	8	46
Q6PBI6		pcbd1	5	51	0.624795	0.720312	1.11216	1.13387	3	3	3	3	3	25
Q6TNS5		MLC3SM	5	30.5	1.38562	0.975663	1.15771	1.13436	8	8	8	8	8	11
Q7ZUI4	Thioredoxin	zgc:56493	8	67.6	0.811247	1.0245	1.07177	1.13491	24	23	24	24	24	8
F1R1P6		nans	4	12	1.20529	0.955779	0.804744	1.13527	5	6	5	5	6	8
Q5D018	RNA-binding protein 8A	rbm8a	3	21.8	0.994465	1.01982	0.837902	1.13595	2	2	2	2	2	9
Q6IQI7		hspe1	6	60	1.07344	1.03526	0.928469	1.13605	10	10	10	10	10	5
F1QQQ6		pnpo	3	18.3	0.520733	0.755945	0.899803	1.1366	2	2	2	2	2	15
Q5SPA1		hebp2	4	19.5	0.476807	0.94991	0.955676	1.13672	4	4	4	4	4	15
A0A0R4IVE7		abcb11b	9	8.1	0.745842	0.938926	1.02935	1.13687	4	4	4	4	4	23
A0A0G2KJA5			3	17.9	0.764754	1.05232	1.12978	1.13747	1	1	1	1	1	14
F1Q9R5		steap4	8	15.3	1.42426	2.60435	1.27471	1.13759	6	6	6	6	6	14
E9QFX0		apoc1l	4	40.5	0.711981	0.875031	1.49414	1.13824	10	10	10	10	10	9
Q6TLG8		rps3	15	62	0.887204	0.818123	1.12075	1.13838	35	35	36	36	37	6
Q5XJ36	Protein DJ-1	park7	6	34.4	0.866433	0.930301	1.02213	1.13918	9	9	9	9	9	5
Q6PHJ8		myl12.1	5	39.5	1.67229	0.779596	0.94556	1.13953	3	4	4	4	3	13
A0A0R4IA30			5	18.8	0.376206	0.717062	1.01877	1.14104	4	4	4	4	4	3
F1R7F6		uggt1	16	11.6	0.938169	1.04043	1.1224	1.14118	10	10	10	10	10	13
Q567V6	Eukaryotic translation initiation factor 3 subunit K	eif3k	4	24.2	1.08372	1.00066	1.39254	1.14138	1	1	1	2	1	5
A0A0R4IZW1		gsna	4	7	1.01683	1.19538	1.01993	1.14223	3	3	3	3	3	5
E9QEE8		ndufb4	2	21	0.337126	0.500769	1.01239	1.14382	1	1	1	1	1	7
F1Q713		sord	9	24	0.888964	1.06975	0.962385	1.14385	15	15	17	15	17	9
Q7ZV34	Malignant T-cell-amplified sequence 1	mcts1	2	14.9	0.557721	0.975096	1.7254	1.1443	2	2	2	2	2	3
A0A0G2KH95			3	11.6	0.846953	0.937445	1.29282	1.14506	3	3	3	3	3	13
A0A0R4IR75			12	14.5	0.650339	0.820553	1.10889	1.14644	13	13	13	13	13	6
E7FCU0		npm1a	9	30.1	0.933095	0.862952	1.25347	1.14645	5	6	6	6	7	8
Q6NV04	Acetolactate synthase-like protein	ilvbl	2	3.4	0.912742	1.13566	1.18289	1.14648	1	1	1	1	1	10
Q561U4		zgc:112160	3	10.9	1.26942	1.00759	1.27523	1.14749	2	2	2	2	2	15
Q6PFU4		cdc42	5	27.7	1.26681	1.07992	1.06833	1.15078	1	1	1	1	1	15
A0A0R4IKF0			14	45.1	1.14896	0.730873	1.06256	1.15206	31	31	31	31	31	24
E7F7J1		fdx1	3	17.7	0.580938	0.948449	1.19796	1.15226	3	2	3	3	3	14
Q1ECX9		pdia4	20	30.4	1.00025	1.05348	1.02437	1.15257	26	27	27	27	27	17
A0A0R4INZ8			4	10.2	0.896519	0.968305	1.00933	1.1537	2	2	2	2	2	8
A0A0R4IG82		uqcrc2a	9	26.1	0.844476	0.916516	0.995632	1.15532	9	9	9	9	9	9
Q6DGJ6		prdx2	10	57.9	0.820684	0.833633	1.07915	1.15545	18	17	18	18	18	14
A0A0G2KCA1			2	9.6	0.911285	1.21987	1.08141	1.15548	2	2	2	2	2	10
Q6DG85	Uricase	uox	11	37.6	0.725476	0.939018	1.17116	1.15643	34	33	34	34	33	19
A0A0R4IQ57		nop58	5	11	0.732533	0.709105	1.16663	1.15802	5	5	5	5	5	9
Q92005	Elongation factor 1-alpha	eef1a	17	36.8	0.651661	0.772117	1.03208	1.15834	37	37	37	37	38	28
A0A0R4IJ08		spna2	49	22.7	0.844855	0.983673	1.14915	1.1584	29	28	28	29	29	18
A2CE73		khdrbs1a	5	9.5	0.833929	1.03862	1.15852	1.15841	6	6	6	6	6	17
Q7ZV50	Magnesium transporter protein 1	magt1	3	9.8	0.64917	0.857471	1.22178	1.15851	1	1	1	1	1	8
B8JIS8		gstm	10	46.6	0.886609	0.917775	1.08165	1.15968	16	16	16	16	16	3
Q6DHQ3	Aspartoacylase-2B	acy3.2	4	16.2	0.794949	1.00108	1.10722	1.16026	5	5	5	5	5	3
Q5SPA3		acat2	9	34.9	0.342032	0.719761	0.803449	1.1613	13	12	12	13	13	28
Q6NYE1		fgb	11	25.2	1.19516	1.15406	1.22819	1.16308	10	11	11	11	11	22
Q6NWG7		cd9a	3	14.5	1.31667	1.29718	1.51242	1.16314	2	2	2	2	2	25
F1R6E5		rad23b	2	4.5	0.818508	1.05732	1.25937	1.16471	1	1	1	1	1	14
F1RDX1		auh	4	12.9	1.0025	1.19825	1.15358	1.16486	2	2	2	2	2	10
E9QJ92		mgst2	2	24.8	0.761469	0.768966	1.10967	1.16495	4	4	4	4	4	3
Q7ZYX4		cct6a	3	7	1.01105	0.898692	1.17436	1.1652	1	1	1	1	1	16
Q6P3I8		gcdh	2	4.5	0.727744	1.04978	1.07404	1.16684	1	1	1	1	1	13
Q6GQN9		dhrs1	9	37.4	1.17433	1.17534	1.08052	1.16693	15	15	15	15	15	3
Q7SZR4		pgam1a	7	30.7	0.748551	0.869324	1.06709	1.16716	6	6	6	6	6	11
B0V1I3		upb1	8	23.7	1.09046	1.16223	1.10462	1.16724	7	7	7	7	7	7
Q8AW82		pa2g4a	6	16.6	0.819255	0.806409	1.24305	1.16805	7	7	7	7	7	15
Q66I80		fabp11a	2	10.4	1.39594	1.03564	1.22993	1.16893	2	2	2	2	2	13
F1QZA5		psmd6	6	12.2	1.00659	0.93961	1.188	1.16939	2	2	2	2	2	19
Q7ZVN5		srp54	5	12.3	0.682623	0.762426	1.14614	1.16998	3	3	3	3	3	19
B8JI08		ogdha	16	15.8	0.968744	0.890723	1.04598	1.17073	9	9	8	9	9	24
Q6DRC0		sars	11	22.7	0.880701	0.84721	1.00398	1.17154	6	6	6	6	6	19
Q4QRF4	Histone H3.2	zgc:173552	5	28.7	0.922037	1.29784	1.30635	1.17251	12	12	12	12	12	8
F1QIB3		dbnlb	3	9.8	1.31103	1.06393	1.26674	1.17262	2	2	2	2	2	15
E7FC21		nt5c2a	3	7.7	1.05575	0.910891	1.06177	1.17267	2	2	2	2	2	20
Q7ZTZ4		fbl	6	21.8	0.661431	0.735576	1.32487	1.17287	6	6	6	6	6	20
X1WBU0		gstz1	8	34.6	0.466684	0.617846	1.26203	1.17405	4	4	4	4	4	4
Q6TNV0		cox4i1	9	51.5	0.684506	0.996129	1.17645	1.17463	27	27	27	27	27	17
F1QYC7	3-hydroxyanthranilate 3,4-dioxygenase	haao	7	25.8	0.864473	1.11477	1.08916	1.17488	13	12	12	12	12	26
E9QI07		clta	4	23.4	1.25862	0.823751	0.80772	1.17511	4	4	4	2	4	10
E7F8T6		LOC100330160	4	9.7	0.753044	0.984927	1.02859	1.1753	2	2	2	2	2	12
Q6TGS6	Tyrosine--tRNA ligase, cytoplasmic	yars	12	23.8	1.40397	0.857447	1.04305	1.17652	1	1	1	2	1	23
F6PB84		hnrpkl	3	8.6	0.675997	1.04902	1.3149	1.17797	2	1	2	2	2	15
A0A0R4IWE1			8	34.9	0.967834	1.29863	1.13359	1.17879	7	7	7	7	7	30
Q7ZV23		nhp2l1b	3	24.2	0.879679	0.590185	1.11205	1.179	6	6	6	6	6	12
F1Q6L1		fahd1	5	23.3	0.873083	1.15174	1.04711	1.1806	5	5	5	5	5	17
F1QVW1		mars	7	8.5	0.714268	0.692763	1.00637	1.18102	2	2	2	2	2	31
Q6PD83	Basic leucine zipper and W2 domain-containing protein 1-A	bzw1a	6	13.6	0.670176	0.764512	0.914125	1.18256	1	1	1	1	1	17
Q7T2P2		cct3	10	22.5	1.11989	0.891975	1.19403	1.18315	3	3	3	3	3	27
F8W4Z6	NADPH--cytochrome P450 reductase	zgc:63480	9	13.3	0.683383	0.776222	1.03182	1.18358	7	7	7	7	7	8
F1QJV7		ddt	2	18.6	0.760315	1.02061	1.05751	1.18384	3	3	3	3	3	10
F1Q8C3		cyp2k6	14	27.9	0.844547	0.842086	1.02223	1.18387	14	14	14	14	14	14
Q6PC13		phb2	14	43.4	0.804938	0.959438	1.15872	1.18417	10	10	10	10	10	16
F1RB36		hacl1	5	10.2	0.764654	1.04937	1.04104	1.18462	2	2	2	2	2	10
A0A0R4IRJ2			4	16.8	1.05116	1.06902	1.07393	1.18465	2	2	2	2	2	4
Q6NV46		stat3	3	4.1	0.916174	1.00528	1.07692	1.1855	1	1	1	1	1	23
E9QCD1		fga	8	17.3	1.30946	0.982969	1.23661	1.18589	5	5	5	5	5	44
B0UYJ6		comta	10	37.9	0.619282	0.739	1.1424	1.18635	5	5	5	5	5	4
Q804G3	Annexin	anxa11b	9	21	0.792725	1.02868	1.21272	1.18646	8	8	8	8	8	12
Q66I08	Organic solute transporter subunit alpha	slc51a	3	8	0.984266	1.06507	1.2759	1.18674	5	5	5	5	5	19
Q6P3L3		hspa5	25	44.8	1.28926	0.905416	1.20764	1.18796	57	58	57	59	59	9
Q6DGY8	Proteasome subunit alpha type	psma6b	9	39.8	0.808418	0.990268	1.13289	1.18968	3	3	3	3	3	10
Q9I8L5	Fatty acid-binding protein 10-A, liver basic	fabp10a	7	60.3	0.910794	0.976869	1.03929	1.19114	54	57	56	54	55	16
F1QDD9		gfpt1	3	8.2	1.14475	0.930063	1.04055	1.19143	2	2	2	2	2	11
E7F6Z6		si:dkey-9l5.2	3	2.2	0.918335	1.15569	1.02749	1.1919	1	1	1	1	1	22
A7MBU9		cmbl	8	29.9	0.677336	1.32125	1.0978	1.19305	5	5	5	5	5	14
Q6NXA6		adh5	8	23.7	0.523693	0.869327	1.0659	1.19349	15	13	16	15	16	34
Q08BA1	ATP synthase subunit alpha	atp5a1	25	46.8	1.19827	0.882877	1.16367	1.19448	51	52	51	54	52	33
A2BHD8	Beta-hexosaminidase	hexb	10	21.6	1.08513	1.6995	1.33038	1.19544	6	6	6	6	6	3
Q7ZV39		zgc:56235	3	10	1.20403	0.970314	1.20289	1.1975	2	2	2	2	2	19
A9JT04		cbsa	10	21.4	0.811047	0.980299	1.12188	1.19967	10	11	11	11	11	12
F8W3N3		fabp7a	3	28.6	0.440515	0.467396	1.44027	1.20087	14	14	14	14	14	14
Q6PBI0		sucla2	7	14.4	1.01643	1.09581	1.11227	1.20178	2	2	2	2	2	33
E7FDV5		LOC100330940	3	10.2	0.909201	1.01689	1.09119	1.20191	4	4	4	4	4	18
F1QIL6		acad9	7	13.3	1.13612	0.980261	1.21674	1.20357	1	1	1	1	1	20
Q6PEH5	Ubiquitin-conjugating enzyme E2 variant 2	ube2v2	4	33.1	0.901893	0.779897	1.29329	1.20379	7	7	7	7	6	5
A0A0G2L612			2	7.2	0.925299	1.20538	1.22277	1.20385	2	2	2	2	2	17
Q6TNT9		gdi2	15	38.4	0.842806	0.97763	1.02408	1.20476	12	12	12	11	12	14
A2ARG7		atp5ib	4	50.7	1.04161	0.782568	1.28019	1.20537	3	3	3	3	3	5
Q5TZ78		cyp2ad3	7	16.2	0.613308	0.934513	1.07655	1.20632	5	4	5	5	5	4
A0A0R4ICN8		syncripl	4	5.6	0.785654	0.804582	1.25442	1.20638	1	1	1	1	1	8
F1RCV0		abcc2	6	4.6	1.58258	0.896339	1.13003	1.20732	1	1	1	1	1	3
Q6Q420		rps15a	6	41.5	0.666414	0.791094	1.16971	1.20815	3	3	3	3	3	22
A3KQK2	Asparagine synthetase	asns	3	7	0.972869	0.879454	1.30102	1.20842	1	1	1	1	1	16
F1R0M4		fus	3	5.9	0.907846	0.967731	1.17471	1.20856	2	2	2	2	2	29
Q7T2A5	Eukaryotic translation initiation factor 3 subunit L	eif3l	12	18.9	0.80564	0.830887	0.987595	1.20877	6	6	6	6	6	18
F1QGW6		eif2s3	7	18.9	0.915607	0.90004	1.26123	1.20879	6	6	6	6	6	6
F1QYD1		cyp2x9	6	12.6	0.749338	0.869081	0.896176	1.20999	7	7	7	7	7	25
B7ZD39		ppa1b	11	54.6	0.997165	1.12351	1.24492	1.21068	18	18	18	18	18	5
E7FCW2		LOC100333777	5	27	0.740311	0.787254	1.10304	1.21133	4	4	4	4	4	29
B0UY92		slc2a2	2	4	0.888795	1.12716	1.187	1.21164	1	1	1	1	1	11
Q6DRE6		rpl12	9	63.6	0.827935	0.814108	1.19182	1.21219	19	21	20	20	20	18
Q6IMW5		fabp6	6	47.3	1.09034	0.972134	8.32851	1.21248	6	6	6	6	6	17
A0A0R4IWP3	Proteasome subunit beta type	psmb2	4	23.6	0.475304	1.09072	1.12454	1.21363	3	3	3	3	3	10
F1QJK4		si:ch211-150d5.2	51	33.6	1.66163	1.11978	1.18121	1.21457	61	63	62	63	60	17
Q6NYE6		cyb5r3	3	11.7	1.09505	1.14457	1.08103	1.21481	2	2	2	2	2	12
A8E7H0		si:ch211-117n7.6	3	9.6	0.751821	1.15944	1.29581	1.21546	4	4	4	3	4	3
Q5TYP3		si:dkey-51e6.1	4	33	0.753895	0.980651	1.26694	1.21576	3	3	3	3	3	15
Q7T303		cnn3a	2	7.9	1.39753	1.07349	1.10699	1.21598	2	2	2	2	2	12
Q6P980	Superoxide dismutase	sod2	3	15.6	0.765185	1.12734	0.868762	1.21632	7	7	7	7	7	15
F1QD17		nop56	10	24.5	0.900424	0.750018	1.21746	1.21638	13	13	13	13	13	9
E7F9F1		larsa	5	14.3	0.833845	0.781594	1.03899	1.21736	3	3	3	3	3	10
E9QCI4		zgc:65987	9	38.2	1.14465	1.07015	1.0189	1.21855	15	15	15	15	15	16
Q9MIY0	NADH-ubiquinone oxidoreductase chain 5	mt-nd5	2	4.5	0.688618	1.12451	1.50757	1.2199	2	2	2	2	2	13
Q7ZU96		cct8	10	21.6	1.20468	0.84111	1.28901	1.22122	2	2	2	2	2	12
B8A5D9		zgc:112210	4	17.8	0.879098	1.07363	1.11551	1.22169	6	6	6	6	6	26
A1A605		ybx1	4	19.1	0.432775	0.464776	1.27384	1.222	13	13	13	13	13	17
F1QKH2		dmgdh	14	18	0.832117	1.12441	0.927413	1.22226	9	9	9	9	9	19
A0A0R4IXF5			8	31.4	0.75262	1.06506	1.19683	1.22332	8	8	8	8	8	9
F1R246		dars	18	34.3	0.535501	0.682384	1.06182	1.22366	10	10	10	11	11	20
A0A0G2KQU1			5	12.1	0.894389	1.03922	1.23516	1.22393	2	2	2	2	2	9
Q566V8		mrpl12	2	12.9	0.863431	0.942941	1.06943	1.22474	1	1	1	1	1	16
F1Q6Z9			18	19.9	0.880545	0.972313	0.87557	1.22532	14	14	14	13	14	8
B8A5D4		txnl1	4	21.1	1.30129	0.970436	1.35483	1.22723	7	7	7	7	7	9
F1Q9I7		snx1a	5	7.7	1.08822	1.13723	1.05565	1.22784	1	1	1	1	1	17
Q6PBY1	40S ribosomal protein S3a	rps3a	16	59.2	0.670054	0.692962	1.12223	1.23091	16	16	16	16	16	6
Q5BJ17	Elongation factor Tu	tufm	7	20.1	0.893258	0.957866	1.38054	1.23098	2	2	2	2	2	6
F8W3C3		zgc:66382	3	19.6	1.54304	1.35653	0.98782	1.23349	2	3	3	3	3	11
F1QZ40		ftcd	22	45.6	0.790014	0.925307	0.99166	1.23373	30	29	31	31	31	11
E7F881		abhd6a	5	24.8	0.32898	0.567155	1.23891	1.23434	1	1	1	1	1	5
B0S6Z1		dhx9	4	4.4	0.901891	1.01918	1.35002	1.23519	1	1	1	1	1	10
A0A0R4ILW3		cpt1a	4	7.6	0.62311	0.805705	0.980068	1.23613	3	3	3	3	3	11
Q9PUE4	Coatomer subunit gamma-2	copg2	7	8.6	0.532141	0.811292	1.05171	1.23623	6	6	6	6	6	6
Q0P487	NADH-cytochrome b5 reductase 2	cyb5r2	8	27.5	0.74781	0.7519	0.947623	1.2382	7	7	7	7	7	16
F1RC33		hnrnpl2	2	4.8	0.771654	0.930332	1.12759	1.2394	3	3	3	3	3	15
X1WCG6			2	5.6	2.93363	5.56716	0.998269	1.23991	2	3	3	2	3	12
Q6TH20		drg2	3	9.9	0.665504	0.859001	1.00372	1.2405	3	3	3	2	3	7
Q6TGV6	Proteasome subunit alpha type	psma5	6	28.2	0.75673	0.890382	1.23277	1.2415	4	3	4	4	3	20
A7MCI0		eif5a	4	23.7	0.756609	0.845287	1.21433	1.24183	10	10	10	10	10	20
A1L259	2-oxo-4-hydroxy-4-carboxy-5-ureidoimidazoline decarboxylase	prhoxnb	6	40.2	1.41157	1.11631	1.16642	1.24292	5	5	5	5	6	11
F1QPT5		si:dkey-96f10.1	5	10.3	1.38241	1.2894	1.24739	1.24293	1	1	1	1	1	24
Q5I0F6		prkar1aa	5	14.2	0.716542	0.944783	1.23428	1.24636	1	1	1	1	1	24
Q567K2		esd	6	28.7	1.22111	1.1353	1.32726	1.24686	5	4	5	5	5	30
Q7T2A8	SH3 domain-binding glutamic acid-rich-like protein	zgc:64130	2	25.2	0.73957	1.45285	1.21728	1.2478	2	2	2	2	2	24
Q6IQA7		hm13	5	13.7	0.389599	0.644939	0.735362	1.24854	1	1	1	1	1	19
F6P928			6	15.2	0.768199	0.91153	1.23879	1.24899	2	2	2	2	2	16
Q8JHJ1	60S ribosomal protein L35	rpl35	5	31.7	0.739977	0.815652	1.0012	1.24944	13	13	13	13	13	17
Q7ZUI0		rpl5a	2	5.4	1.01395	0.751049	1.32533	1.25112	2	2	2	2	2	14
Q0P4B4		tagln	4	21.1	0.660116	1.2358	2.06338	1.25125	1	1	1	1	1	7
Q7ZV49		hprt1	6	33	1.36585	1.04955	1.17673	1.25146	5	5	5	5	5	13
Q7ZWJ4	60S ribosomal protein L18a	rpl18a	8	43.2	0.790943	0.790004	0.969601	1.2528	16	16	16	16	16	11
Q90WA5		pdip5	8	20	1.26939	1.09558	1.29885	1.25299	15	15	15	15	15	7
F1QFQ6		dlst	7	17.5	1.01335	1.07695	1.11687	1.2548	5	5	5	5	5	11
Q6DRC4	Eukaryotic translation initiation factor 3 subunit G	eif3g	3	12.6	0.437898	0.841608	1.37073	1.25519	3	3	3	3	3	28
Q6NY41		cyb5b	2	11.1	0.802308	0.768575	1.07289	1.25557	1	1	1	1	1	14
A0A0G2L2K5			7	15.9	1.49579	1.21837	1.25796	1.25618	8	8	8	9	9	13
F1QTT3		jupa	3	4.5	0.99249	1.03815	1.18743	1.25668	2	2	2	2	2	20
F1QPT1		uroc1	6	10.7	1.08659	1.11243	1.09889	1.25694	11	11	11	11	11	27
F1QYS7		acss1	10	16.2	1.14134	1.68989	1.05955	1.25718	3	3	3	3	3	15
A0A0R4IFI9			3	14.6	1.06405	1.20624	1.3636	1.25718	4	5	5	5	5	6
Q5MJ86	Glyceraldehyde 3-phosphate dehydrogenase 2	gapdh-2	6	20.6	0.988196	1.15925	1.26893	1.25765	2	2	2	2	2	12
Q567V5		snrpd2	2	15.3	0.553848	0.719337	0.977691	1.25854	2	2	2	2	2	17
Q08BB2	Probable carboxypeptidase PM20D1.2	pm20d1.2	8	15.3	0.937068	0.853922	1.01856	1.25868	3	3	3	3	3	25
A8WGS0		cyb5a	5	49.6	0.758786	0.743677	1.32119	1.25875	7	7	6	7	6	25
Q6NSN2	Amine oxidase [flavin-containing]	mao	16	34.7	0.725907	1.31655	1.35112	1.25877	16	16	16	16	16	8
Q6IQL7		ppid	2	4.6	0.835066	0.801696	1.32711	1.25959	2	2	2	2	2	49
Q66JN5		pon1	6	22.2	0.94426	1.54077	1.62866	1.26064	2	2	2	2	2	9
Q7ZV22	S-methyl-5-thioadenosine phosphorylase	mtap	4	18.6	0.961588	1.03493	1.13295	1.26217	2	2	2	2	2	15
A0A0R4IW72		acmsd	4	14.9	0.841135	1.07979	1.26803	1.26342	3	2	3	3	3	15
A0A0R4IAH3			10	27.6	0.749258	0.800045	1.04508	1.26393	8	8	8	8	8	12
F1QZV8		si:dkey-265e15.5	4	5.4	0.694192	1.15091	1.23027	1.26431	3	3	3	3	3	21
Q7ZZ04		echs1	8	35.7	0.676228	1.1033	1.16721	1.26457	7	7	7	7	7	19
F1QQC5		slc27a2a	12	22.3	0.576468	1.07458	1.10522	1.26468	9	9	9	9	9	9
E9QE30		fdps	7	23.7	1.28718	0.820172	0.910455	1.26478	5	5	5	5	5	18
Q5XIY2	Transmembrane protein 56-B	tmem56b	2	8.3	0.377404	0.810187	1.19499	1.26568	1	1	1	1	1	22
A0A0R4IKT0			7	30.8	0.785724	1.13043	1.05478	1.26624	5	5	5	5	5	13
F1R9P3	Tetratricopeptide repeat protein 38	ttc38	5	13.8	0.613991	0.961923	1.36029	1.26635	2	2	2	2	2	27
Q5RHR0		parp1	3	3.8	0.572172	0.93043	1.38409	1.26721	1	1	1	1	1	20
A0A0R4IGM8		mia3	2	1	2.40207	1.2682	1.31129	1.26746	2	2	2	2	2	14
F1QNZ1	MOSC domain-containing protein 1, mitochondrial	zgc:110783	8	28	1.05911	1.05534	1.08596	1.26799	7	7	7	7	7	6
Q6NYG8	Dihydropyrimidine dehydrogenase [NADP(+)]	dpyd	21	26.7	0.773938	1.00209	1.18279	1.26841	20	21	21	21	21	23
F1Q8A5		hnrnpd	6	21.7	0.683891	1.06771	1.17472	1.26863	2	2	2	2	2	21
Q7T2E1		sec13	6	27.8	0.953743	0.938695	1.22417	1.27216	3	3	3	3	3	22
I3ISA3		myh10	16	10.2	0.83706	0.839528	1.25595	1.27493	2	2	2	3	2	11
F1QV29		c3b	26	18	1.23306	1.653	1.22323	1.27604	10	10	10	10	10	9
A0A0R4ISX6			26	46	0.836235	0.826377	1.22781	1.2765	111	109	111	113	113	18
A0A0R4IH71			5	13.4	0.807945	0.963619	1.169	1.27777	5	5	5	5	5	11
E7F4J8		BX088525.2	7	17.5	1.05409	1.01302	1.15761	1.27948	4	3	4	4	4	26
Q6DHL6	40S ribosomal protein S6	rps6	10	34.1	0.911257	0.870975	1.26333	1.28026	27	26	27	26	27	2
Q6P016	Purine nucleoside phosphorylase	pnp4b	9	40.8	0.518732	0.897532	1.15395	1.28028	5	6	6	6	6	25
Q4QRJ7	Eukaryotic translation initiation factor 2A	eif2a	10	20.5	0.695282	0.886156	1.21461	1.28048	7	7	7	7	7	14
Q4KMD5		lpgat1	5	20.5	0.53559	0.83308	1.39692	1.28359	4	4	4	4	4	24
B8JLQ3		ncl	21	30.3	0.841076	0.802296	1.33867	1.28393	27	27	27	27	27	32
Q6P0V6	60S ribosomal protein L8	rpl8	9	44	1.03059	0.757926	1.17778	1.28474	19	19	19	20	20	19
Q5BLE8	Putative all-trans-retinol 13,14-reductase	retsat	12	19.6	0.881468	0.787186	0.918439	1.28576	19	18	18	19	19	18
Q7T3D9	Malate dehydrogenase	mdh1a	17	56.1	0.692846	0.967811	1.12667	1.28594	48	49	49	48	49	6
Q7ZVB2	Aldehyde dehydrogenase family 9 member A1-A	aldh9a1a	13	28.9	0.769997	0.975391	1.19871	1.28624	11	11	11	11	13	21
A0A0R4IBN6			4	10.1	0.603249	1.288	1.11719	1.28753	4	4	4	4	4	16
Q4V914	Histone H2A	h2afy2	9	24.8	0.919277	1.27569	1.41113	1.28788	1	1	1	1	1	10
Q7ZUN7		ckmt1	8	22.3	0.976687	0.897979	1.04849	1.28814	7	8	8	8	7	11
A8E7N8	Proteasome subunit beta type	psmb4	2	16.4	0.562902	0.745468	1.35629	1.29045	3	3	3	3	3	47
F6NYT7		gpx1a	12	60.2	0.513169	1.06152	1.12439	1.2913	28	24	27	28	28	35
A9JRF7		si:ch211-93f2.1	10	16.2	0.794179	1.40183	1.16129	1.29131	18	18	18	18	18	23
Q6PHD8		pa2g4b	12	30.7	0.78708	0.909924	1.30621	1.29467	6	6	6	6	6	19
F1RBU6		aifm1	12	26.8	1.09151	1.02607	1.29171	1.29531	8	8	8	8	8	31
Q6AXI7		acads	5	12.8	1.17451	1.21541	1.09306	1.29665	1	1	1	1	1	6
Q6PBW7		rps19	12	66.4	0.816557	0.783923	1.04434	1.29937	22	22	22	22	22	7
Q802C9		eif4a1a	13	32.8	0.853203	0.836793	1.31387	1.30055	17	17	17	17	17	20
F1QQQ3		vtg3	13	11.3	0.964933	0.930919	1.47064	1.30079	8	8	8	8	8	23
F6PBQ1			7	23.3	0.412028	0.958632	1.14251	1.30163	11	11	11	11	11	23
A0JMN1		cyp4v7	2	5.3	0.9046	1.02542	1.40864	1.30219	1	1	1	1	1	8
Q7SYH6		pah	12	26.1	0.77202	1.06453	1.15566	1.30332	8	7	7	8	8	39
Q6IQI6		rpl11	5	28.7	0.717184	0.780477	1.19608	1.30341	12	12	12	12	12	11
B8JMZ1		ugp2a	18	35.7	0.834316	1.11598	1.33718	1.3049	23	22	25	25	24	11
F1RBW3		prkcsh	8	24	0.940453	0.998633	1.16663	1.30604	11	12	11	12	13	14
Q6P5M3		rps9	14	53.6	0.704541	0.768083	1.12953	1.30704	25	25	25	25	25	12
A8E526		rpl14	7	44.6	0.826463	0.83763	0.966409	1.30742	19	20	20	20	19	38
E7FAQ8		zgc:66127	5	12.6	0.347978	0.912945	1.23084	1.30975	1	1	1	1	1	10
O57521	Heat shock protein HSP 90-beta	hsp90ab1	21	33.5	0.860887	1.05652	1.22721	1.3098	31	31	29	31	31	25
Q6P0S5		adh8a	17	45.4	0.663641	0.988404	1.03885	1.31186	88	86	86	87	93	8
Q803T5	Adenosylhomocysteinase	ahcy	22	50.8	0.867982	0.838557	0.887806	1.31225	44	43	42	45	46	46
Q6PBW3		rps14	4	36.4	0.840872	0.743451	1.14187	1.31414	7	6	6	6	7	8
Q6DGK2	L-lactate dehydrogenase B-B chain	ldhbb	12	33.2	1.12832	1.00455	0.904182	1.31457	13	13	13	12	13	29
Q3B7R0		cyc1	6	19.9	1.19924	0.937774	1.20739	1.31457	7	6	7	7	7	4
Q5XJ10	Glyceraldehyde-3-phosphate dehydrogenase	gapdh	16	62.8	0.79351	1.06899	1.11843	1.31492	69	61	68	70	67	48
Q7ZW09		hnrpl	4	7.6	0.599963	1.04141	1.27717	1.31636	2	2	2	2	2	17
B0R028	Proteasome subunit beta type	psmb5	7	30.9	0.833028	0.97623	1.13148	1.32062	4	4	4	4	4	14
A0A0R4IE72		try	3	15.1	0.636661	0.84354	1.16413	1.32089	1	1	1	1	1	11
F1QGS9		LOC100535236	2	3.4	1.32849	1.14413	1.25963	1.32108	5	5	5	5	5	15
F1QY24		agxta	10	30.4	0.657504	0.889785	1.07224	1.32113	21	20	21	21	21	24
A2BIN5		mccc2	6	13.4	0.710506	1.07709	1.10996	1.32198	7	7	7	7	7	10
F1QI99	Signal recognition particle subunit SRP68	srp68	2	3.2	0.646237	0.742436	1.29042	1.32233	2	2	2	2	2	14
A0A0R4IZ60		zgc:136493	5	21	0.763335	1.09811	1.1858	1.3227	4	4	4	4	4	26
F1R3I6		setb	5	21.8	1.02805	1.04503	1.32249	1.3232	11	11	10	11	10	10
F1QR17		aldh7a1	15	36.6	0.894144	1.08355	1.14881	1.3252	22	19	20	21	22	17
Q6PUF3	Hydroxysteroid 11-beta-dehydrogenase 1-like protein	hsd11b1l	4	16.7	0.512381	0.785021	0.670963	1.32541	6	6	6	6	6	39
Q6IQP3	Calumenin-A	calua	9	35.2	0.998701	0.883081	1.25434	1.32557	12	12	12	12	13	6
B0UYA3		cryl1	4	18.4	0.990935	1.07404	1.19689	1.32737	5	5	5	5	5	30
Q8UVG6		rbp2a	8	69.6	0.721013	0.932263	1.21457	1.32805	5	4	4	7	7	13
F1QTB5		rpn1	28	46.7	0.776239	0.933215	1.27542	1.32928	23	23	23	23	23	5
Q7SZQ7	Surfeit locus protein 4	surf4	2	8.9	0.614105	1.08158	1.39504	1.33552	1	1	1	1	1	7
Q1L907		tfa	9	35.4	0.745219	1.03638	1.04473	1.33573	42	41	41	42	41	7
Q5BJJ2		rpl3	14	28.8	0.856213	0.847917	1.31574	1.33627	20	20	20	20	20	39
Q1LWX6		hsd17b8	3	14.1	0.811716	0.977495	0.998454	1.33688	2	2	2	2	2	34
F1QF00		pgm1	22	46.7	0.681491	1.10337	1.12912	1.33716	52	50	51	52	52	25
Q6XG62		icn	2	25.3	0.756072	1.30232	1.27977	1.33791	3	3	3	3	3	21
Q1RLT1	GMP reductase	gmpr2	7	24.1	0.409888	0.794969	1.15242	1.33844	3	3	3	3	2	11
Q66I21	Aldehyde dehydrogenase family 8 member A1	aldh8a1	9	20.3	0.855071	1.01252	1.05942	1.33908	13	13	13	13	13	17
Q8AW07		psmd12	4	9.2	0.621235	0.843584	1.09649	1.3391	3	2	3	3	3	26
F1QFC0		hspa9	17	26.2	1.0426	0.947847	1.26502	1.33922	14	14	14	14	14	20
F1QDQ5		manf	7	36.7	0.858558	0.872511	1.24884	1.33935	7	7	7	7	7	20
Q802D5		pfn2	3	29.3	0.898175	1.18714	1.41313	1.33939	6	6	6	6	6	22
Q6NUZ3		syncrip	7	12.7	0.528238	0.906675	1.23152	1.33944	7	7	7	7	7	11
F1Q7N8		si:dkey-28b4.8	2	2.7	0.64738	0.952977	1.27442	1.34135	2	2	2	2	2	9
F1QV15		vtg6	18	16.5	1.22335	0.582098	1.35071	1.3436	21	21	20	21	21	25
Q7ZU67		eif4a1b	3	9.6	0.597778	0.756213	1.09819	1.34618	1	1	1	1	1	26
E7EY26		hsd3b7	4	13.6	0.865686	1.15545	1.14983	1.34699	1	1	1	1	1	6
F1R2V0		zgc:113006	12	16.4	1.18992	1.12865	1.07416	1.34993	4	4	4	4	4	22
Q6PBI5	40S ribosomal protein S25	rps25	6	37.1	0.651943	0.587926	1.044	1.34999	9	9	9	9	9	16
Q6PC14	60S ribosomal protein L23	rpl23	8	55	0.75428	0.824936	1.21741	1.35127	31	31	31	33	31	12
B8JHU4		actn1	4	4.8	0.876184	1.22025	1.2972	1.35232	3	3	3	3	3	29
Q561X2		tmed9	5	21.1	1.03346	0.891556	1.05399	1.35237	9	8	9	9	9	28
A2BG14		gda	2	4	0.910481	0.821766	1.19347	1.35275	1	1	1	1	1	31
Q5TYY5		akr1b1	8	27.3	0.866253	1.00676	1.18103	1.35369	3	3	4	4	4	34
Q6P6F0		rps17	5	35.1	0.906678	0.888617	1.31668	1.35623	8	7	7	8	8	9
F1RD77		npm1b	3	10.3	0.457834	0.690189	1.38128	1.35672	1	1	1	1	1	22
F1QAJ7		slc25a3b	13	37.9	0.60473	0.972188	0.996569	1.35703	17	17	17	17	17	13
A0A140UHW3			7	27.1	0.684926	1.01294	1.18558	1.35806	4	4	4	4	4	12
Q6NZU0		hspa4b	4	5	0.790583	1.07196	1.3518	1.35843	1	1	1	1	1	31
A0A0R4IXL8			5	2.3	0.72056	1.27833	1.14003	1.35939	1	1	1	1	1	26
Q5TZ82		cyp2n13	4	7.4	0.488994	1.11025	1.10862	1.36017	1	1	1	1	1	14
F1QZU5	Tyrosine-protein phosphatase non-receptor type	ptpn11a	2	3.5	0.799992	0.917014	1.45526	1.36194	1	1	1	1	1	18
A5PMS9		ap1b1	4	4.4	0.886826	0.992465	1.03647	1.36222	3	3	3	3	3	16
A7YT77		qdpra	9	55.3	0.62166	1.08954	1.17305	1.36272	24	24	24	25	26	10
A7YT47		hadhaa	19	27.7	1.18872	1.23157	1.39397	1.3636	12	12	12	13	13	26
E7F022		xdh	7	4.9	0.950349	1.01966	0.714917	1.36437	2	2	2	2	2	24
Q6DGM0		rpl35a	4	27.3	0.749548	0.840791	1.21772	1.36591	8	8	8	8	8	19
A0A0R4IND9		eppk1	9	15.9	0.925973	0.944846	1.31678	1.36673	8	8	8	8	8	10
Q8JHI0		slc25a5	15	43	0.598958	0.924788	1.06854	1.36945	38	38	38	38	38	17
A0A0R4IB94		pls3	18	29.6	0.913719	1.14515	1.3311	1.3696	9	9	10	10	10	5
F1QUV7		gars	9	14.5	0.850868	0.820759	1.2927	1.37203	7	7	7	7	7	15
Q68EK8		tnpo2	3	3	0.994336	0.946132	1.09705	1.37232	1	1	1	1	1	41
E9QDD3		ugt5d1	3	7.4	0.527786	1.06966	1.23167	1.37428	2	2	2	2	2	34
F1RCA1		uba1	13	12.6	0.705316	1.02682	1.16511	1.37541	3	3	3	3	3	24
A3KPR3		histh1l	7	27.9	0.37057	0.910749	1.13492	1.3756	11	11	11	11	11	32
Q7ZVM6		tia1l	3	9.6	0.623679	0.87492	1.2481	1.37759	5	5	5	5	5	21
Q6PHI8		tkt	16	31.2	0.901721	0.995937	1.03772	1.37801	23	20	22	23	23	61
P62084	40S ribosomal protein S7	rps7	5	21.6	0.797053	0.840648	1.36807	1.37817	8	8	8	8	8	17
Q6DGH3		sec61b	3	29.9	0.637384	0.788351	1.22348	1.37847	6	6	6	6	6	45
E9QDH1		cox7a1	2	38.3	0.476799	1.01044	1.13645	1.38103	2	2	2	2	2	33
E9QB42	Acidic leucine-rich nuclear phosphoprotein 32 family member A	anp32a	5	26.3	0.870944	0.843276	1.22028	1.38165	6	6	6	6	6	33
F1R3Q3		2017-09-06	5	13.9	0.642125	1.02698	1.26807	1.38187	3	3	3	3	3	14
Q7ZVF3	Succinate dehydrogenase [ubiquinone] flavoprotein subunit, mitochondrial	sdha	7	15.7	0.80414	1.08089	1.42652	1.38246	4	3	4	4	4	26
F1Q8H6		ech1	5	14.6	0.754379	0.969371	1.26779	1.38262	7	7	7	7	7	16
F1QE89		aldh5a1	10	28.2	1.00228	1.4354	1.10104	1.38298	5	5	5	5	5	35
A0A0R4IGG3	Triosephosphate isomerase B	tpi1b	16	74.7	0.6841	1.00432	1.02393	1.38399	48	46	48	48	48	9
F1R264		ephx2	14	29.4	1.05973	1.17114	1.01411	1.38463	7	7	7	7	7	9
F1QH80	Peptidyl-prolyl cis-trans isomerase	fkbp2	5	37.3	0.661681	0.691219	1.58	1.38526	3	3	2	3	3	19
Q6IMW6		rps13	9	49.7	0.672404	0.811099	1.27662	1.39016	14	14	14	15	14	30
Q6DRI1	Eukaryotic translation initiation factor 3 subunit E-A	eif3ea	7	17.7	0.673436	0.961829	1.40993	1.39197	4	3	4	4	4	23
Q6NWJ2		spcs3	4	24.4	0.579768	0.802265	1.32784	1.39373	6	6	6	6	6	20
E7FDY7	Glucose-6-phosphate 1-dehydrogenase	g6pd	4	9	1.03283	1.43757	1.11848	1.39438	4	4	4	4	4	29
Q6NYJ9		ap2b1	9	10	0.766174	0.889591	1.15368	1.39605	4	4	4	4	4	30
Q567N5		rpl6	10	30.2	0.873488	0.913407	1.27384	1.39657	27	27	26	27	28	31
Q6NXC1		rbm4.3	7	26.4	0.540797	1.07389	1.3849	1.39747	6	6	6	6	6	34
A2CEW4		atic	4	8.3	1.05215	0.848613	1.39965	1.39909	6	6	6	6	6	16
Q6GQM3	Proteasome subunit alpha type	psma6l	2	11.5	0.629308	1.11116	1.36435	1.39984	1	1	1	1	1	13
A0A0R4IBM1			12	28.9	0.852785	1.25665	1.2036	1.40003	16	16	17	17	16	16
Q7T3L3		hsp90b1	30	39.1	1.2197	1.14729	1.29892	1.40273	57	57	55	58	57	47
Q7ZW04	S-adenosylmethionine synthase	mat1a	12	36.7	0.568953	0.918435	1.19309	1.40354	39	35	39	39	40	32
Q6NYQ7		nnt	12	13.9	0.532645	1.00668	1.24181	1.40417	1	1	1	1	1	11
Q803Q7	Fructose-bisphosphate aldolase	aldoaa	3	7.1	1.2045	1.67832	1.59475	1.40541	2	2	2	2	2	18
F1QFV6		rpl28	11	61.6	0.805248	0.876819	1.22279	1.40702	17	17	17	17	17	12
Q90487	Hemoglobin subunit alpha	hbaa1	7	60.1	1.18697	0.966312	1.33412	1.40866	28	27	28	28	29	16
F1QGK0		gpd1b	9	25.8	1.10556	1.11801	1.23647	1.41156	11	11	11	11	11	28
Q66HV4	Coatomer subunit beta	copb1	15	17	0.61107	0.80907	1.21001	1.41159	7	7	7	7	7	34
A5WUQ7		si:dkeyp-88f5.1	11	5.1	0.768875	1.09735	1.14475	1.41185	3	3	3	4	4	26
Q7ZUN6		paics	9	24.5	0.751627	0.907512	1.34391	1.41268	7	7	7	7	7	14
I3IT87	AP-2 complex subunit mu-B	ap2m1b	6	16.6	0.626882	0.807915	0.728927	1.41342	2	2	2	2	2	28
Q7ZWE9	UMP-CMP kinase	cmpk	3	19.9	1.15108	1.20602	1.39149	1.41504	3	3	3	3	3	28
Q5XJS8		hsd17b10	5	21.5	0.870735	1.22706	1.50216	1.41542	4	4	4	4	4	17
B8A4D7		rrbp1a	42	35.1	0.43435	0.612976	1.27879	1.41633	53	51	51	53	51	40
Q7ZTS8		elavl1	3	9	1.08295	1.23439	1.2902	1.41674	1	1	1	1	1	25
Q803B0		hspd1	15	32.9	1.24297	0.922317	1.20138	1.41863	13	12	12	12	13	23
Q4VBU7		cox5aa	4	22.7	0.755611	0.836628	1.14972	1.41885	4	4	4	4	4	27
Q7ZUW8	Aspartate aminotransferase	got1	9	21.7	0.688052	0.981443	1.20523	1.41962	7	7	7	7	7	46
M9MMC8		ighm	2	6.6	0.882051	1.23048	1.56767	1.4198	3	3	3	3	3	28
F1QJZ3		agmat	10	32	0.6939	0.924248	0.91147	1.42083	21	19	21	19	21	32
F1QBM2		pdcd4a	7	18.4	0.67468	0.994525	1.24693	1.42276	2	2	2	2	2	18
Q6IQQ0		rpl21	8	39.4	0.725295	0.822516	1.27023	1.42355	6	7	6	7	7	25
E7F3G8		si:ch211-113j14.1	7	13.3	0.640003	1.02229	1.16055	1.42416	7	7	7	7	7	13
Q66I59	Putative L-aspartate dehydrogenase	aspdh	3	17	0.857499	0.99397	1.18061	1.42492	4	4	4	4	4	26
A0A0R4IGN3			24	56	0.833967	0.915997	1.15371	1.42565	59	57	58	60	60	43
F1R4Z8	Glutathione S-transferase	gstal	9	34.5	0.72359	1.11793	1.24106	1.42723	18	18	18	18	18	36
R4GEY3		si:ch211-113a14.18	2	11.6	0.263417	0.992734	1.55612	1.42736	4	4	4	4	4	31
Q6PC90	40S ribosomal protein S12	rps12	6	40.2	0.786188	0.912288	1.45031	1.42983	14	14	14	14	14	11
A0A0R4IZJ7			9	27.4	0.846432	1.74102	1.46073	1.43056	7	6	8	8	7	17
Q0P4F7	Acyl-CoA synthetase family member 2, mitochondrial	acsf2	16	29	0.475833	0.791844	1.26756	1.4313	17	16	17	18	19	27
Q71PD7	Histone H2A.V	h2afv	2	18.8	0.64246	1.33343	1.81067	1.43289	5	4	5	5	5	11
Q7T3B1		psmc2	10	26.1	1.10523	0.944767	1.38635	1.43378	4	4	4	4	4	32
Q9DGK4	Translationally-controlled tumor protein homolog	tpt1	7	38	0.777061	0.77251	1.18855	1.43384	17	17	17	17	17	33
Q8JGS9	40S ribosomal protein S18	rps18	9	45.4	0.802049	0.819805	1.21338	1.43441	15	15	15	15	15	21
O42248	Guanine nucleotide-binding protein subunit beta-2-like 1	gnb2l1	20	73.5	0.659691	0.908791	1.05969	1.43602	25	23	24	25	25	24
Q803W9		tagln2	2	10.4	1.3537	1.85993	2.28216	1.43607	2	2	2	2	2	14
A2CF48		crata	6	11.7	0.936068	1.27498	1.31435	1.44232	4	4	4	4	4	15
F8W5L3		oat	3	7.7	0.970504	1.27613	1.40781	1.44243	3	3	3	3	3	24
F1R5W4		glrx	3	45.7	0.862633	1.10238	1.27295	1.44288	7	8	8	8	8	21
Q3B7E4		hrsp12	6	73.7	0.896115	1.1414	1.18233	1.44317	12	12	13	14	15	22
E7FB64		cyp4t8	8	15.5	0.821686	1.04548	1.33144	1.44518	3	3	2	3	3	20
F1QYX8		hadhab	30	44.4	1.03892	0.957926	1.29139	1.44528	36	35	35	36	36	4
F1QYT2		sqrdl	3	7.9	0.336293	1.05697	1.20169	1.44575	2	2	2	2	2	20
F8W4M7		aco2	21	30.3	0.863837	1.10715	1.26512	1.44576	17	16	17	17	17	38
F1QDQ1		copa	11	11	0.522156	0.861246	0.965762	1.44631	3	3	3	3	3	11
X1WH26			6	15.7	1.16029	1.34336	1.34686	1.44691	2	2	3	2	3	23
A0A0R4I9K9		pla2g12b	3	19.5	0.375028	0.604627	1.14921	1.44888	4	4	4	4	4	46
Q504B8		pcbp3	2	9.1	0.714401	0.819034	0.913307	1.44889	2	2	2	2	2	17
F1QUW4		hyou1	17	21.4	1.38628	1.04138	1.17701	1.44943	10	10	10	10	10	28
F1QUG3		ugt1b4	4	9.1	0.745099	1.06986	1.55195	1.45068	6	6	6	6	6	34
B0UYB4		si:dkey-91i10.3	7	13.6	0.574564	1.38571	1.1066	1.45205	2	2	2	2	2	37
Q7ZVI7	Actin, cytoplasmic 1	actba	15	53.1	1.19195	1.04052	1.45039	1.45365	58	57	60	64	65	11
A0A0R4IU19			17	21	0.833934	1.47286	1.33269	1.45523	24	24	24	24	24	19
A0A0G2KUJ0			2	7.3	0.652196	0.778691	1.36542	1.45719	2	2	2	2	2	8
Q5CZW2		upp1	6	31.3	1.10477	1.3303	1.40882	1.45768	7	8	9	9	9	16
A0A0R4IQZ3		eci1	8	27.6	0.647165	1.0415	0.820391	1.45873	8	8	8	8	8	34
A0A0F6PK88	Adenylate kinase 2, mitochondrial	ak2	3	15.3	0.487887	0.9697	1.29302	1.4592	3	3	3	3	3	11
I3ISH4		lypla2	2	9	0.673993	1.14349	1.38415	1.46132	2	2	2	2	2	34
F1Q8J4		acadvl	11	19	0.704597	0.963106	1.30446	1.46249	4	4	4	4	4	9
F1R319		slc25a11	8	30.5	0.493165	0.999352	1.17151	1.46365	2	2	3	3	3	16
Q7T3C9		srp19	2	15.6	0.698552	0.902711	1.44096	1.46371	3	3	3	3	3	11
B0R197		vdac3	10	30.8	1.22441	0.977257	1.16291	1.46422	11	11	11	11	11	34
F1QFN3		larsb	9	13.3	0.768747	0.772007	1.25961	1.4667	3	3	3	3	3	43
E7EZW6		srpr	3	5.2	0.67859	0.851622	1.34269	1.47092	1	1	1	1	1	22
P62247	40S ribosomal protein S8	rps8	9	43.8	0.594357	0.797719	1.26657	1.47225	35	35	35	35	35	62
Q6ZM13		si:ch211-5k11.6	3	30.8	0.857523	1.0425	1.34321	1.4739	5	6	5	6	5	15
Q8AX99		actn3b	2	2.4	0.554443	1.10278	1.37551	1.4748	1	1	1	1	1	34
F8W4C4	Ubiquitin carboxyl-terminal hydrolase	usp5	4	9.4	0.862819	1.09523	1.3111	1.47799	3	3	2	2	2	18
A3KQR0		acadl	9	26	0.702291	0.930418	1.11713	1.47861	11	11	11	11	11	29
B0UYN4		zgc:162944	8	46.9	0.500007	0.972117	1.50619	1.48036	6	6	6	6	6	24
Q6NYV3		h1f0	5	23.1	0.59863	0.831833	1.49286	1.48283	7	7	7	7	7	48
Q5BKV9		rpl9	7	43.8	0.709074	0.741917	1.2632	1.48374	17	16	17	17	18	39
Q6DHS3	Ribosomal protein L15	rpl15	7	27.9	0.932835	1.02269	1.39558	1.4904	11	11	11	11	11	47
F1QLT9		rars	13	23.4	0.440622	0.913208	1.39925	1.49105	4	3	4	4	4	12
R4GEC2		a1cf	8	16.2	0.610336	0.938285	1.34131	1.49207	10	10	10	10	10	18
A0A0R4IXZ6		eif4h	2	13	0.675658	1.05842	1.43325	1.49209	6	6	6	6	6	25
Q1LXR3		rrbp1b	34	38.2	0.552727	0.827243	1.42551	1.49343	29	28	29	32	31	15
A0A0R4II89			28	60.5	0.696809	0.951197	1.15394	1.49473	71	72	74	73	76	27
Q6DI22		hadh	9	29.1	0.663413	0.975331	1.18745	1.49484	7	7	7	7	7	19
Q1MTC4		vtg2	32	21.8	1.91536	0.922615	1.4437	1.49522	48	48	47	48	48	9
Q6IQE2		eef1b2	7	31.1	0.593056	0.72574	1.31388	1.49631	9	8	9	9	9	21
Q5BLE6		zgc:113054	2	3.6	0.611404	0.574619	0.89639	1.49664	1	1	1	1	1	13
Q6TH14	Enolase	eno3	23	58.2	0.659372	0.836789	1.25463	1.49716	43	43	43	43	44	34
B0S5S6		pdia5	9	19.5	0.561182	1.07837	1.5665	1.4975	6	6	6	6	5	17
B7ZD32	40S ribosomal protein S24	rps24	6	45.4	0.661883	0.935287	1.37369	1.50091	23	22	23	23	23	42
F1R9Y8		hdlbp	40	31.6	0.544851	0.725628	1.35808	1.50212	48	48	48	48	48	16
F1QXV8	Phosphoglycerate kinase	pgk1	16	52.3	0.864936	1.08113	1.2406	1.50295	35	32	34	34	36	17
Q4VBV1	Cytochrome b-c1 complex subunit 7	uqcrb	6	44.1	0.836885	0.760443	1.30074	1.50304	5	5	5	5	5	30
F1QM42		aco1	26	30.8	0.701258	0.916989	1.26696	1.50353	27	25	28	29	29	13
Q1LWH1		rps16	9	44.5	0.786704	0.817115	1.13782	1.50443	9	9	9	9	9	16
F1Q5K3		sardh	21	29.5	0.71104	1.29579	0.943286	1.50617	8	8	9	9	9	44
Q641M4		zgc:100918	4	19.5	0.704289	1.26209	1.47868	1.50711	1	1	1	1	1	19
Q7T2V2	Cytosolic sulfotransferase 3	sult1st3	5	20.9	0.722136	1.2185	1.72299	1.50744	3	3	3	3	3	30
Q6AZW2	Alcohol dehydrogenase [NADP(+)] A	akr1a1a	12	31.2	0.642413	1.04257	1.17545	1.50779	6	6	6	6	6	38
Q8JH71	Fructose-bisphosphate aldolase B	aldob	19	51.4	0.677639	0.917164	1.04021	1.50964	51	47	51	54	54	24
E9QEB6		arf1l	2	20.1	0.593551	0.962535	1.28783	1.51427	6	6	6	6	6	28
F1R4U0		slc25a1b	10	28.7	0.521081	1.18749	1.26551	1.5144	10	10	10	10	10	38
K7DY73		hao1	7	23.6	1.08692	1.27317	1.177	1.51783	5	5	5	5	5	11
Q6NUW5	Acidic leucine-rich nuclear phosphoprotein 32 family member E	anp32e	2	10.4	0.611713	0.788893	1.39062	1.5198	1	1	1	1	1	19
Q6NYR4	Heat shock cognate 71 kDa protein	hspa8	29	49.8	0.890168	0.898803	1.19552	1.52141	34	35	34	34	34	17
A0A0R4IYX1		adka	10	35.9	0.840938	0.880046	1.0068	1.52173	11	10	10	11	12	42
Q1LY08		cpox	3	8	0.598842	1.01532	0.832925	1.52302	1	1	1	1	1	67
P61485	60S ribosomal protein L36a	rpl36a	5	26.4	0.746087	0.899143	1.54617	1.52304	5	5	5	5	5	37
Q08BF2		slc27a1b	6	12.8	0.929737	1.18088	1.52932	1.52468	7	7	7	7	7	41
Q9DDU5		gstp1	12	63.9	0.705102	1.00823	1.30076	1.52887	69	66	69	70	69	26
A2CG95		acadm	14	39.9	0.875337	1.1427	1.28339	1.52894	14	14	14	14	15	45
B8JL30		hmgb2a	4	20.1	0.356259	1.28044	1.42477	1.52896	6	5	5	6	6	15
A9C460		si:ch211-170d8.5	6	26.7	0.780499	1.11321	1.22956	1.53218	5	5	5	5	5	19
F1QY43		psmd1	7	7.7	0.883219	0.748089	1.27011	1.53337	5	6	5	6	6	20
Q642J0		hint1	5	56.3	0.524331	0.939857	1.33491	1.5341	5	3	4	4	5	59
I3IRX8		rcn3	14	42.2	0.610722	0.666206	1.51976	1.53706	29	26	28	30	30	23
A0A0R4IMA6		mthfd1b	25	30.9	0.629136	0.958584	1.50007	1.53706	29	29	29	29	29	26
E9QF69	60S ribosomal protein L18	rpl18	4	25.6	0.76045	0.753614	1.17568	1.54271	10	10	10	11	11	21
B8JKN6		ppiaa	8	55.5	0.803685	0.994558	1.49728	1.54363	28	26	29	29	29	12
A9JSU3	Fatty acid desaturase 2	fads2	5	11.9	0.577235	0.653259	1.15107	1.54488	1	1	1	1	1	34
Q6DGA6	Allantoicase	allc	6	20	0.55781	0.984827	1.19971	1.54511	3	3	3	3	4	35
Q568A3		capns1a	2	14.1	0.611556	1.28667	1.42465	1.54667	1	1	1	1	1	15
Q642H9	40S ribosomal protein S4, X isoform	rps4x	14	52.1	0.663499	0.846359	1.35681	1.5484	23	22	22	24	24	28
Q6DRD1		atp5o	8	47.8	1.02783	0.944411	1.22371	1.54844	17	17	16	18	18	36
Q7T368		pdhb	6	17.3	0.912219	1.08888	1.48062	1.55208	1	1	1	1	1	44
Q5SPG8		si:dkey-11e23.4	4	8.9	0.622512	1.09679	1.3571	1.55224	1	1	1	1	1	17
F1QDB3		zgc:92630	10	45.1	0.876396	1.19857	1.21439	1.55259	13	13	13	13	13	62
F1QDW6		LOC569147	2	8.4	0.318192	0.991837	1.04757	1.55345	1	1	1	1	1	37
Q1LYB7		rpl13a	11	42.9	0.675728	0.742506	1.13941	1.55606	22	22	22	21	22	7
A7YY10		zgc:171772	4	48.9	0.563754	0.84899	1.30706	1.55712	12	12	12	12	12	32
F1QCN0		zgc:112056	2	8.8	0.657416	0.973795	1.31626	1.55912	2	2	2	2	2	16
F1QCW3		wu:fd55e03	14	40.7	0.584443	1.06511	1.44064	1.56023	13	11	13	14	14	45
Q7ZV05		rps11	11	49.1	0.757726	0.884691	1.39835	1.56262	16	17	17	16	17	58
Q567C7		pecr	2	8.4	0.814892	1.14364	1.39607	1.5653	4	4	4	4	4	33
R4GE02		zgc:114037	11	35.5	0.760643	1.31645	1.54399	1.56711	54	53	55	56	55	47
B0R1E9		zgc:92357	3	15.1	0.793102	1.06228	1.58218	1.56977	17	17	17	17	17	31
A0A0R4IS10		hnrnpm	2	2.8	0.884501	1.21101	1.441	1.56989	1	1	1	1	1	41
F8W5B8	Phosphorylase	pygl	34	43.7	0.915911	1.11734	1.28834	1.57175	65	66	66	68	67	33
E7EZE2		si:dkey-239i15.3	5	5.7	0.524634	1.05793	1.19144	1.57557	3	3	3	3	3	30
Q1RLY6	Kynurenine 3-monooxygenase	kmo	13	28.5	0.482344	1.09349	1.0758	1.57796	15	15	15	15	15	18
Q6P6E0		atp5l	3	35	0.504444	0.99286	1.02543	1.57798	6	6	6	6	6	23
Q6DI20		dpp3	6	10.9	0.648024	0.660202	1.19882	1.58014	1	1	1	1	1	41
Q803P2	T-complex protein 1 subunit alpha	tcp1	8	15.6	0.682681	0.874346	1.21583	1.58029	4	4	4	4	4	30
Q6DHT4		aldh6a1	17	40.2	0.621995	1.33869	1.28497	1.58193	23	24	25	25	24	39
Q7T1D8		phb	8	32.5	0.90539	0.805827	1.57044	1.58305	4	3	4	4	4	53
Q7ZW95		rpl4	18	46.1	0.90221	0.852807	1.28531	1.58331	23	23	23	23	23	21
F1QHJ4		dap	2	14.3	0.624099	0.878716	1.26453	1.58628	1	1	1	1	1	63
A5PL98	Succinate dehydrogenase [ubiquinone] iron-sulfur subunit, mitochondrial	sdhb	2	8.9	0.602458	1.07298	1.18155	1.59076	4	4	4	4	4	47
Q803J2		ube2na	5	36.4	0.944597	0.962639	1.51661	1.59095	1	1	1	1	1	30
F5H8N4		lrpprc	4	2.5	0.798158	0.899189	1.34112	1.59447	1	1	1	1	1	30
E9QCF1		blvrb	5	30.2	0.631628	0.953696	1.23071	1.59465	2	2	2	2	2	48
Q7ZUY3	Histone H2A.x	h2afx	2	14.1	0.620655	1.06884	1.70569	1.59739	3	3	3	3	3	13
A0A0R4ILN2			4	12.9	1.19861	1.47992	1.46337	1.60489	2	2	2	2	2	60
Q7T334	Malate dehydrogenase	mdh2	13	45.1	0.809439	1.09019	1.30099	1.60494	23	23	23	23	24	15
A0A0R4IP07	Elongation factor 1-gamma	eef1g	22	42.3	0.682066	0.911914	1.23225	1.60555	32	31	33	33	33	33
Q1MTC6		vtg7	6	5.4	1.12837	0.526932	1.27864	1.60754	4	4	4	3	4	27
I3ITN9		aldh1l1	40	43.3	0.842266	1.27147	1.37371	1.61351	96	92	97	95	96	40
Q5RGK8		snd1	41	51.9	0.734292	0.862416	1.32804	1.61356	50	50	51	52	51	48
Q98T96		cyp2ad2	16	31.9	0.580611	1.12353	1.24413	1.6163	33	33	34	34	34	34
Q6P3L9	Glutamate dehydrogenase	glud1b	28	61.1	0.884659	1.312	1.28642	1.61719	85	84	86	85	88	26
A3KPG5		crp3	4	16.6	1.53946	1.64999	1.58883	1.61884	2	2	2	2	2	39
E7F071		FP085405.1	4	5	0.84912	1.22788	1.48622	1.62276	3	3	3	3	3	37
B8JL43		tfa	36	59.3	0.831477	1.271	1.19802	1.62294	84	81	84	84	84	35
F1QAK5		nt5c2b	2	4.1	1.25597	1.12607	1.31059	1.62804	1	1	1	1	1	36
Q7T387		abhd14b	2	11.7	0.761936	1.4172	1.61354	1.6329	4	4	4	4	4	32
Q6P5K3	60S acidic ribosomal protein P0	rplp0	12	49.7	0.715523	0.869552	1.41512	1.63436	30	26	27	30	30	41
F1QCH7		zgc:162816	4	12	0.800855	1.29345	1.33902	1.63571	7	7	7	7	7	27
F1QWK0		zgc:103601	4	17	0.617535	0.871651	1.27282	1.63579	5	5	5	5	5	48
A8KBV1	Succinyl-CoA:3-ketoacid-coenzyme A transferase	oxct1b	12	32.5	0.641777	1.19922	1.2729	1.63655	29	28	29	29	29	40
Q66I16		etfdh	11	23.2	0.717487	1.39065	1.63464	1.6378	6	6	7	7	8	32
Q7ZWJ7	60S ribosomal protein L34	rpl34	6	41.9	0.80488	0.862438	1.45994	1.64031	17	17	17	17	17	23
Q1LWN2		vtg1	59	45.9	1.59559	0.792069	1.68626	1.64329	116	120	118	122	120	49
F1R9Y5		pck2	26	48.9	0.862428	1.4065	1.22343	1.64546	56	57	58	58	59	92
E9QCX2		grhprb	16	44.4	0.74856	0.928841	1.14642	1.64578	33	32	33	33	33	47
Q7ZU99	Transitional endoplasmic reticulum ATPase	vcp	21	32.1	0.744994	1.1048	1.38144	1.64642	21	21	20	21	21	45
Q5PRA2	Probable 2-oxoglutarate dehydrogenase E1 component DHKTD1, mitochondrial	dhtkd1	7	12.2	0.6509	1.0875	1.60803	1.64832	3	4	4	4	4	43
Q6P3J5		eef2b	43	48.6	0.715338	0.807868	1.36282	1.65544	91	85	91	97	98	57
Q6P5L3	60S ribosomal protein L19	rpl19	7	26	0.958607	0.901697	1.59756	1.65852	16	16	16	16	16	27
F1QYZ6	Pyruvate carboxylase	pc	5	4.6	1.20467	1.53087	1.0183	1.65906	1	1	1	1	1	44
Q5TZD2		prdx6	11	48.7	0.758022	1.45284	1.64796	1.65962	7	7	7	7	8	38
Q1RLT0	S-adenosylmethionine synthase	mat2al	5	16.9	0.615834	0.965999	1.40076	1.66178	6	6	4	6	6	20
Q6Q417		rpl7	11	40.7	0.692128	0.890929	1.32183	1.66249	37	36	39	38	39	53
Q7ZVY5	Citrate synthase, mitochondrial	cs	8	21.2	0.814048	1.19361	1.39361	1.66485	3	3	3	3	3	52
B0UXL2		idh1	17	38	0.819843	0.966857	1.35163	1.66644	26	25	27	27	27	77
A3KPZ2		cratb	2	4.6	0.912373	1.00102	1.05018	1.6673	2	2	2	2	2	87
F1QSB3		srprb	4	16.9	0.708613	0.913268	1.14511	1.67147	6	6	6	6	6	43
F1R6R2		si:ch211-270n8.1	2	14.1	0.703719	1.91017	0.920666	1.67586	3	2	4	4	4	21
Q502D1	Glyoxalase domain-containing protein 5	glod5	6	40.5	0.841136	1.16011	1.54533	1.67763	6	6	6	6	6	53
Q6P0T0		ndufs8a	2	9.5	0.880959	0.992867	1.59656	1.67989	3	3	3	3	3	38
Q7T1J9		rps10	8	42.8	0.4083	0.568766	1.27437	1.68183	13	13	12	13	13	42
Q08C78		btf3	2	19.8	1.23746	0.494496	1.77361	1.68402	2	2	1	2	2	39
H9GXN9		pmt	16	53.7	0.839244	0.779588	1.44509	1.68467	23	22	23	24	24	34
Q6PC95		tuba8l2	7	20.3	0.883519	0.927783	1.21469	1.68785	10	10	9	10	10	26
F1QCD8		hao2	5	16	1.26067	1.27226	1.64371	1.69357	4	4	4	4	4	44
E7EZY3	Pyruvate kinase	CABZ01066502.1	13	33.6	0.793323	0.873249	1.32002	1.69885	15	14	15	18	18	43
F1R1P2		ugt1ab	13	35.4	0.556583	1.22745	1.52234	1.70116	23	22	23	24	25	47
P83571	RuvB-like 2	ruvbl2	3	7.1	0.888397	0.953119	1.44461	1.70177	1	1	1	1	1	51
Q7ZUG6		rpl30	5	50.4	0.558432	0.693793	1.02702	1.70495	10	10	10	10	10	37
F1QCV2		hdac10	3	6.2	0.961984	1.2564	1.32671	1.70509	1	1	1	1	1	45
Q7SYK7	Aspartate aminotransferase	got2a	16	36.4	0.745441	1.14815	1.28951	1.70598	24	24	24	24	24	43
A9C3Q7	Aminomethyltransferase	amt	5	14.7	0.88362	1.26139	1.23645	1.70896	4	4	4	4	4	55
Q6A3P5		ndrg1a	5	19.4	0.892693	0.914583	1.5571	1.70941	5	4	4	4	4	13
Q6PHD9	Selenium-binding protein 1	selenbp1	9	26.3	0.665066	1.18981	1.33104	1.71252	9	9	9	9	9	57
E9QJ40		fam120c	2	2.6	0.766756	0.731029	1.49367	1.71353	2	2	2	2	2	56
Q6NWC3		rps2	13	50	0.570296	0.783317	1.2983	1.71628	32	33	33	33	33	17
A0A0R4IFJ4			39	35.1	0.741774	1.22546	0.966367	1.71867	44	44	44	44	45	45
Q7T1D7	Dimethylaniline monooxygenase [N-oxide-forming]	fmo5	12	28	0.556197	1.14047	1.45542	1.72236	10	10	10	10	10	56
Q7SZ53		crp2	3	15.3	2.51479	0.828037	1.17641	1.7241	2	2	2	2	2	42
Q6GQN6		acaa1	6	20.6	0.832559	1.0954	1.72772	1.72421	6	6	6	6	6	70
P79735	GTP-binding nuclear protein Ran	ran	4	20.9	0.664198	0.974346	1.58722	1.7293	5	5	5	5	5	44
Q6NYR0	Serine hydroxymethyltransferase	shmt1	15	30.6	0.790222	1.01044	1.22998	1.7318	23	22	21	23	23	21
A0A0G2KWP7			7	29.9	0.834704	1.03708	1.315	1.73275	8	8	8	8	8	65
Q7ZUM0		ywhaqa	2	17.1	1.27422	1.55027	1.56856	1.7338	5	5	5	5	5	60
F1Q884	Glycine N-methyltransferase	gnmt	7	29.9	0.626217	1.11033	1.37846	1.73449	17	17	16	17	17	46
F1Q6E1	4-hydroxyphenylpyruvate dioxygenase	hpda	23	56.9	0.783278	0.897381	1.13705	1.73711	60	53	61	62	62	80
A0A0R4ICC6			4	11.8	1.19848	1.04403	1.26278	1.73741	3	3	3	3	3	40
A3KPR4	Histone H4	wu:fe37d09	7	51.5	0.711853	1.29482	1.52772	1.73889	40	39	41	40	41	60
A8WGP7	UDP-glucose 6-dehydrogenase	ugdh	11	27.6	1.07779	1.2469	1.54502	1.74794	13	15	15	16	15	77
B1H1J6		dpys	11	23.4	0.784927	1.1716	1.08597	1.75651	12	12	12	12	12	54
A8KC02		cbr1l	9	39	0.628964	1.58952	1.35451	1.75743	16	16	16	16	16	31
A0A0R4IN76			15	24.2	0.68841	1.16164	1.66891	1.75906	6	6	6	6	5	71
Q6NX98		st13	4	14.4	0.590079	1.30357	1.7054	1.76426	2	2	2	3	3	69
A0A0R4IIZ7		zgc:77052	5	21.5	0.560032	1.23979	1.50361	1.76621	5	5	5	5	5	56
Q6DGU9		zgc:92763	5	24.9	0.781121	1.11417	1.50749	1.76633	6	6	6	6	6	61
Q6NWJ5		tuba8l4	16	48.2	0.67142	0.893425	1.28451	1.76924	20	20	20	19	20	41
Q7ZTT8	NADH dehydrogenase [ubiquinone] 1 alpha subcomplex subunit 4	ndufa4l	4	32.9	0.456652	0.968992	1.527	1.77948	6	5	6	6	6	38
E7FDF9	Malate synthase	LOC564844	7	14.6	0.668646	0.975218	1.19829	1.78134	1	1	1	1	1	24
Q7T1K0		rpl17	7	40.2	0.952278	0.858738	1.60804	1.78657	13	13	13	13	13	96
F1QZU7		aldh2.2	5	13	0.712379	1.34386	1.52917	1.78821	19	19	20	21	20	54
A5WVX8		metap2a	2	6.6	1.36604	1.27529	1.8957	1.79139	1	1	1	1	1	58
E7F4R9	Isocitrate dehydrogenase [NADP]		7	16.3	0.927781	1.14676	1.4741	1.79323	5	5	5	5	5	54
Q6TH32		cfl1	4	24.8	0.558953	0.970069	1.69692	1.79417	11	11	10	11	10	78
Q803G3	Serine/threonine-protein phosphatase	ppp2cb	2	11	0.964171	0.55347	1.27953	1.79603	2	2	2	2	2	78
B8JI00		suclg1	5	18.2	0.741708	1.40842	1.50208	1.7973	14	14	14	14	14	55
Q6P009		dao.3	8	24.4	0.555697	1.18409	1.28651	1.8055	6	6	6	6	6	54
F1QJC1		dhrs9	13	42.9	0.600847	0.954142	1.4056	1.81904	25	25	25	25	25	43
Q6AZA0	Acetyl-CoA acetyltransferase, mitochondrial	acat1	9	22.4	0.800781	1.4509	1.48805	1.83268	6	6	6	6	6	98
I3ISJ2	Cytochrome b-c1 complex subunit 6	uqcrh	5	52.8	1.31014	0.796735	1.24381	1.83361	4	4	4	5	5	83
Q6NWE0	Ester hydrolase C11orf54 homolog	zgc:85789	6	22.9	0.698461	1.06195	1.36252	1.83646	2	2	2	2	2	46
F1R3F7		si:ch1073-329n19.2	4	21.5	1.23367	1.33521	1.73959	1.84614	4	4	4	4	4	47
F1R9W9	Delta-1-pyrroline-5-carboxylate dehydrogenase, mitochondrial	aldh4a1	23	41.4	1.06923	1.39299	1.56455	1.84939	31	31	32	33	33	51
Q6PHK4		agxtb	11	30.7	0.930026	1.30591	1.32985	1.86322	25	25	25	25	25	44
Q6P3G9		erp44	7	21.3	1.57005	1.50256	1.2002	1.87094	1	1	1	1	1	44
Q8AYH1		hsd17b4	14	26.2	0.857939	1.0144	1.39525	1.87651	14	9	12	15	15	128
Q6IQ59		uqcrc2b	13	38.3	1.17765	1.25473	1.82384	1.87775	3	3	3	3	3	55
A0A0R4I9F5	Dolichyl-diphosphooligosaccharide--protein glycosyltransferase 48 kDa subunit	ddost	10	26.8	0.586842	0.766784	1.25562	1.88329	25	25	25	25	25	55
Q6ZM12		OTTDARP00000002003	5	36.7	1.07582	1.19053	1.25563	1.88525	9	9	9	9	9	53
Q90Z10	60S ribosomal protein L13	rpl13	9	36.5	0.862947	0.821728	1.59767	1.88525	20	20	20	20	20	50
Q9I8V1		actc1b	5	15.6	0.827643	0.948664	2.16893	1.89376	17	17	16	18	18	53
Q6PC01		faua	2	8.3	0.823348	0.764262	1.62013	1.89379	4	4	4	4	4	44
F1QUE3		uqcrc1	7	19.5	0.774513	1.14829	1.57845	1.89581	3	3	3	3	3	77
Q6NV37		gyg1a	6	19.8	0.710648	1.01621	1.33073	1.89625	2	2	2	2	2	81
E7EZ94		gstt1a	11	44.6	0.732835	1.11773	1.4848	1.89629	33	33	33	33	33	66
A5WV37		zgc:92871	2	29.5	0.404189	1.08222	1.34291	1.898	4	4	4	4	4	70
Q5U386		ppm1bb	6	16.5	0.511702	1.18838	1.69902	1.90169	2	2	2	2	2	67
F1QEL0		tmem214	5	7.1	0.839107	0.856844	1.74701	1.9131	1	1	1	1	1	35
F1QAZ9		hnrnpk	6	16.7	1.3991	1.42741	2.16791	1.93094	2	2	2	2	2	39
B0UYE4	O-acyltransferase	soat1	4	8.5	0.62984	0.826278	1.51973	1.93979	2	2	2	2	2	40
Q6P2V4		hgd	14	35.9	0.761563	1.19581	1.43205	1.94191	36	38	40	41	42	69
A0A0R4IGT3		dpm1	2	12.4	0.309857	0.848468	1.04529	1.9424	1	1	1	1	1	65
Q5RH26	ATP synthase subunit gamma	atp5c1	6	27.4	1.48873	1.26049	1.86274	1.94964	6	7	6	7	7	48
A8KB78		rps23	4	28.7	0.831723	0.850823	1.55046	1.95422	5	5	5	5	5	77
F1QTW8		matr3l1.2	2	4.5	0.763354	1.07807	1.34004	1.96095	1	1	1	1	1	75
F1R7E6	Iodothyronine deiodinase	dio1	3	18.1	0.453574	1.6392	1.77409	1.96501	1	1	1	1	1	33
Q6P5L8	Hydroxysteroid dehydrogenase-like protein 2	hsdl2	20	56.4	0.97995	1.24276	1.52084	1.97861	28	28	28	28	28	114
Q8JGR4	60S ribosomal protein L24	rpl24	9	45.2	0.523142	0.837134	1.62953	1.98581	15	15	15	15	15	104
Q7SXA1		rpl26	7	35.2	1.05403	1.02722	1.72372	1.99153	6	7	7	7	7	96
Q6P948		pdha1a	6	13.2	0.774531	1.26945	1.53211	2.00263	2	2	2	2	2	24
F6P8R2	Oxysterol-binding protein	osbp	4	5.7	0.947305	1.43376	2.04735	2.01088	1	1	1	1	1	28
I3IRW7		abat	18	42.6	0.668653	1.05115	1.54876	2.01796	33	32	32	32	32	66
Q7T2F5		napa	2	11.2	0.628346	1.23591	1.735	2.02023	3	3	3	3	3	86
Q6PBJ8	Peptidyl-prolyl cis-trans isomerase	fkbp1aa	3	39.8	0.624968	1.51219	2.45243	2.02691	5	5	5	5	5	53
Q6P5M9		tubb4b	15	43.4	0.572879	0.833816	1.60899	2.0281	30	28	29	32	30	65
A0A140LGU1		hp1bp3	11	19.3	0.574033	1.06262	1.82606	2.0316	1	1	1	1	1	42
B0S5D9		tm9sf2	2	5.2	0.484248	1.09652	1.55746	2.03315	1	1	1	1	1	79
Q5U3G0		pgrmc1	7	41.3	0.489109	1.10461	1.3952	2.0392	20	19	20	18	19	102
Q7SXP0	Vesicle-trafficking protein SEC22b-B	sec22bb	2	7.9	0.587206	0.701587	1.48418	2.04736	1	1	1	1	1	140
Q7SX99	Fumarate hydratase, mitochondrial	fh	5	11.2	1.07156	1.07903	1.47948	2.04786	5	5	5	5	5	48
E9QIR9		rpl10	7	47.2	0.931977	0.955558	1.64278	2.08551	23	23	25	25	25	81
Q90486	Hemoglobin subunit beta-1	ba1	10	79.7	1.01672	0.886926	1.6225	2.08614	52	50	54	58	59	85
Q6PE45		rer1	2	13.8	1.18295	1.44464	1.77331	2.09065	1	1	1	1	1	78
Q6PC80		rps5	8	35.8	0.923414	0.806186	1.72433	2.09337	8	8	8	8	7	57
B8JIS1		atp5f1	7	27	0.901601	1.11132	1.46184	2.09492	6	6	6	6	6	149
Q24JV1		rpl32	5	34.1	0.785053	0.793072	1.539	2.11121	7	6	7	7	7	131
Q7SXN2		hnrpdl	4	14.9	0.420206	1.15732	1.63928	2.1166	1	1	1	1	1	59
B0UYS4		dera	5	22.3	0.583721	1.10759	1.34363	2.13383	2	1	2	2	2	52
F1R5X7		dhrs11b	6	31.4	1.2716	1.65563	1.84528	2.13442	2	3	3	3	3	37
A3KQE8	Ribose-phosphate pyrophosphokinase	prps1a	4	12.6	0.493395	0.873811	1.22071	2.14874	2	2	2	2	2	53
E9QBV1		cltcb	3	3.5	0.823193	0.898967	1.42431	2.14936	3	3	3	3	3	34
Q7T337		fbp1b	13	43.3	0.596447	0.876751	1.42079	2.15396	26	24	25	26	26	71
Q5XJS3		scp2b	3	21.8	0.500805	1.12389	2.19224	2.1644	2	2	2	2	2	141
F6NGD6		slc27a2b	3	5.7	0.684041	0.905162	1.31143	2.1699	1	1	1	1	1	42
E9QCY4		nupr1	5	70.7	0.567587	0.809728	1.58167	2.17245	5	4	6	6	6	51
Q568L5	Alcohol dehydrogenase [NADP(+)] B	akr1a1b	7	28.1	0.469756	1.46234	1.98894	2.17603	3	3	5	5	4	59
Q6PBZ1		rpl7a	11	38	0.49534	0.852493	1.9077	2.17862	20	18	19	20	21	36
Q7ZV82	60S ribosomal protein L27	rpl27	6	42.6	1.08787	1.09126	1.97018	2.18251	13	13	13	13	13	72
Q24JV3		rpl31	8	46.3	0.782934	0.890679	1.48844	2.18577	7	7	7	7	7	49
Q5PR98	Protein NDRG2	ndrg2	4	11.7	1.00628	1.42658	1.85923	2.18736	1	1	1	1	1	43
F6P2R4			9	25.1	0.657562	1.39233	1.68739	2.20076	10	10	10	10	10	135
E7FCQ0		cnbpb	2	12.4	0.409333	0.927315	2.22515	2.20858	3	3	3	3	3	83
F1Q5Q3		serbp1a	5	13.5	0.609162	0.968466	1.90336	2.22009	2	2	2	2	2	46
F1QUQ7		psmc3	4	13.1	0.855308	1.16569	1.84151	2.22956	4	4	4	4	4	96
Q7ZVT2	Pyruvate kinase	pkma	5	10.5	1.2034	1.08063	1.6183	2.2313	1	1	1	1	1	86
A0A0R4IGQ7			4	17.1	0.287344	0.627045	1.84939	2.24397	3	2	2	3	3	69
A0A0R4IUZ2			23	47.9	0.867098	1.30057	1.54965	2.25009	41	37	41	42	42	122
E7FD66		aass	4	5.7	0.726963	1.33758	1.49836	2.25825	3	3	3	3	3	70
F1R3V8	Coiled-coil domain-containing protein 47	ccdc47	4	10.9	0.913331	1.24357	1.60145	2.2642	1	1	1	1	1	76
F1R7X5		suclg2	19	46.8	0.878816	1.03878	1.5902	2.26845	25	26	24	28	28	65
F1QTL9		hnrnpa0b	7	26.8	0.659378	0.993375	1.93002	2.28068	11	11	11	11	11	69
A0A0G2L3Z2			3	10	0.666024	0.953261	1.59038	2.29649	2	2	2	2	2	63
Q08BS3		rbbp9	3	19.9	0.955281	1.12026	1.86708	2.30342	3	3	3	3	3	122
H9GXR0		zgc:85829	7	57.3	0.455029	0.831646	1.40241	2.31808	11	11	11	11	11	73
F1Q7L0		vtg4	3	2.1	0.853821	0.74088	1.65856	2.32058	4	4	4	4	4	74
A2BFT4		ftr82	6	12	1.40175	1.39081	1.43932	2.34231	2	2	2	2	2	67
B0UY94		eif5a2	2	15.6	0.309472	1.11395	2.14814	2.34249	2	2	2	2	2	94
Q6IQM2	Cytochrome c	cyc	4	39.4	0.38591	0.851331	1.30618	2.3933	2	2	2	2	2	173
F1QWR0		nipsnap3	4	19.9	1.13994	1.96399	1.87412	2.42642	1	1	1	1	1	73
Q6DGX4		gcshb	3	22.4	0.685713	1.35103	1.38819	2.43272	7	6	7	8	9	32
B0S5C5		acaa2	13	51.6	0.684282	1.36626	1.54383	2.44364	25	25	27	27	27	82
A0A140LH63			2	12.4	1.21051	1.32567	2.2615	2.44434	1	1	1	1	1	26
F1R966		cltca	29	19	1.06836	1.07923	1.57456	2.48461	21	21	22	22	22	94
E9QHX8		ssr4	4	31.4	0.638315	0.94039	2.16374	2.48768	4	4	4	4	4	57
Q6PC77		atp5h	11	77	1.13467	1.00355	2.04594	2.52738	11	11	11	11	11	56
F1QPA8		sult3st1	4	15.4	0.71589	0.914952	2.53582	2.53796	1	1	1	1	1	62
Q566W6		zgc:112425	2	12.4	0.72713	1.33024	2.43889	2.57733	4	3	4	4	4	176
Q6PBX2		sar1b	3	17.2	0.545017	0.932731	1.89636	2.59684	6	6	6	6	6	100
Q803F6	40S ribosomal protein SA	rpsa	8	40.3	0.676762	0.880204	1.64709	2.65252	23	20	23	24	25	82
Q7ZUZ2		actr1	3	8.5	1.20566	1.24457	2.26836	2.66276	1	1	1	1	1	136
Q6NYL5	Alanine aminotransferase 2-like	gpt2l	12	30.8	1.15239	1.6657	2.09391	2.68484	12	11	12	11	11	70
A8WGC6	ATP synthase subunit beta	atp5b	17	46.8	1.11357	1.08097	1.99457	2.69001	46	43	45	50	53	99
A0A0G2KYZ5			7	31.7	1.70514	1.3863	2.29573	2.75763	6	6	6	6	6	114
F1QFW5		rpn2	10	19.2	0.615762	1.07291	2.18194	2.77085	8	8	8	8	8	96
Q6ZM23		cox6c	4	35.5	0.565795	1.10423	2.17234	2.77234	5	5	5	5	5	102
F1Q9T9		rpl23a	8	39.5	1.01996	0.984087	2.28287	2.77495	22	22	22	22	22	124
A5PN40		cryz	2	16.1	0.871614	1.71763	2.29553	2.78969	3	3	2	3	3	178
F1QG78	Phosphatidylinositide phosphatase SAC1-A	zgc:158642	3	5.3	0.375183	0.80239	1.90999	2.79	1	1	1	1	1	145
A0A0G2L6T1			2	19.1	0.590955	1.25695	1.9854	2.82364	2	2	2	2	2	143
Q7ZUG5	40S ribosomal protein S21	rps21	3	32.1	1.54279	0.92191	2.4037	2.87598	1	1	1	1	1	92
Q7ZZJ7		slc4a1a	2	2	0.280597	0.907097	2.26807	2.94085	1	1	1	1	1	78
Q499B2		spcs1	2	25.5	0.782282	1.32507	2.66476	2.97393	1	1	1	1	1	117
E9QD12		dcxr	3	19.5	0.660727	0.990328	2.69243	2.98584	1	1	1	1	1	120
E7F1Y3		CU928854.1	6	18.5	0.830048	1.68376	1.89067	2.99211	1	1	1	1	1	161
B0R1D0		psmc4	4	9.3	0.773034	1.36736	2.46232	3.02205	2	2	2	2	2	136
Q7SXK5	Probable imidazolonepropionase	amdhd1	8	25.2	0.753771	1.21348	1.68587	3.02463	3	3	3	3	3	115
A0A0R4ITM4		cirbp	2	12.4	0.54252	1.23704	2.74108	3.02656	7	7	7	7	7	81
F8W4R3		aprt	2	10.7	0.372434	0.9271	1.23436	3.02743	1	1	1	1	1	147
Q6P5K5		rplp1	2	48.7	0.181723	0.435984	1.70938	3.03409	1	1	1	1	1	186
F1QEJ5		uqcrq	3	29.3	0.470477	0.852079	1.74961	3.15257	1	1	1	1	1	92
A0A0R4IPA1			3	11.2	1.1865	2.45626	1.90181	3.18272	1	1	1	1	1	138
F1QHJ1		rps26l	5	45.2	0.588121	1.03219	2.44046	3.34956	3	3	3	3	3	104
A7E2L0		dad1	2	17.7	0.562015	1.00667	1.52324	3.37672	2	2	2	2	2	152
A0A0R4INN3			8	18.4	0.906161	1.94145	2.71365	3.55989	4	4	4	4	4	134
A0A0R4IYD0			3	38.1	0.621463	1.09483	2.6466	3.63984	6	6	6	5	6	140
Q6DGL9		rpl38	4	45.7	1.01027	1.45505	2.43463	3.64158	3	4	4	4	4	213
A0A0R4IPH2			2	6.1	0.433911	0.825083	3.22414	3.71227	3	3	3	3	3	174
Q6DRD2		psmc6	5	15.7	0.63366	1.51736	3.15361	3.85203	1	1	1	1	1	169
F1QCE3		prdx5	2	15.8	0.704404	2.96854	3.15656	4.27987	2	2	2	2	2	176
F8W5T8		zgc:152945	5	16.3	0.463194	3.50852	3.38486	4.74273	2	1	3	2	3	193
Q6DHB9		sccpdha	2	7.3	1.3283	1.31511	2.19442	4.84907	1	1	1	1	1	240
R4GEX4		eif3f	3	10.6	0.730954	0.839682	2.69673	6.22568	1	1	1	1	1	224
Q6Q415	60S ribosomal protein L36	rpl36	4	30.5	0.430909	0.810923	3.0172	7.41956	1	1	1	1	1	235
Q90485	Hemoglobin subunit beta-2	ba2	2	16.9	8.04811	1.23243	1.60366	9.40993	2	2	2	2	2	351
