# Supplementary material for: Type 2 Diabetes Induced by Changes in Proteomic Profiling of Zebrafish Chronically Exposed to a Mixture of Organochlorine Pesticides at Low Concentrations
Source: Int J Environ Res Public Health. 2022 Apr 20;19(9):4991. doi: 10.3390/ijerph19094991 (PMC9100612; doi:10.3390/ijerph19094991)
Supplement: Supplementary file 1 [file ijerph-19-04991-s001.zip › Supplemental Dataset 2 (XLSX).xlsx]

## Sheet: Cluster 1-6
Cluster 1			Cluster 2			Cluster 3			Cluster 4			Cluster 5			Cluster 6
Protein accession	Protein name	Gene name	Protein accession	Protein name	Gene name	Protein accession	Protein name	Gene name	Protein accession	Protein name	Gene name	Protein accession	Protein name	Gene name	Protein accession	Protein name	Gene name
Q5RI57	Novel protein (Si:ch211-240l19.8)	si	A0A0R4IA30	Eukaryotic translation elongation factor 1 delta a (guanine nucleotide exchange protein)	eef1da	Q6P0V8	Annexin	anxa5b	Q1LYB7	Ribosomal protein L13a	rpl13a	X1WBU0	Glutathione S-transferase zeta 1	gstz1	Q7SXM1	Cytochrome c oxidase subunit	cox6b2
B8JI17	Prosaposin	psap	Q7ZV34	Malignant T-cell-amplified sequence 1 (MCT-1)	mcts1	Q05AJ2	Methyltransferase-like 7A (Zgc:153889)	mettl7a	Q6DH65	Density-regulated protein (DRP)	denr	E7F881	Abhydrolase domain-containing 6a	abhd6a	Q9MIX8	Cytochrome b (Complex III subunit 3) (Complex III subunit III) (Cytochrome b-c1 complex subunit 3) (Ubiquinol-cytochrome-c reductase complex cytochrome b subunit)	mt
Q6NWC1	Vdac1 protein (Voltage-dependent anion channel 1)	vdac1	Q6P4V5	Sterol carrier protein 2 (Sterol carrier protein 2a)	scp2a	E7F238	Solute carrier family 25 (mitochondrial carrier; dicarboxylate transporter), member 10	slc25a10	F1QTN8	Un-named hu7910	unm_hu7910	Q7ZSY6	Metallothionein-2 (MT-2)	mt2	F1QDQ1	Coatomer subunit alpha	copa
Q66HW9	Chymotrypsin-like	ctrl	Q9PUE4	Coatomer subunit gamma-2 (Gamma-2-coat protein) (Gamma-2-COP)	copg2	F1QSM3	Cytochrome P450, family 2, subfamily X, polypeptide 7	cyp2x7	Q5BLE6	Zgc:113054	zgc	F1QDA6	Acyl-CoA synthetase long chain family member 1b	acsl1b	Q567V5	Novel protein similar to vertebrate small nuclear ribonucleoprotein D2 polypeptide 16.5kDa (SNRPD2) (Si:dkey-113g17.2) (Small nuclear ribonucleoprotein D2 polypeptide)	snrpd2
B3DFS9	Myosin, heavy chain 11a, smooth muscle (Myosin, heavy polypeptide 11, smooth muscle)	myh11a	Q0P4B4	Transgelin	tagln	A3KPS7	UDP-glucuronosyltransferase (EC 2.4.1.17) (Fragment)	ugt5c2	F8W3N3	Fatty acid-binding protein 7, brain, a	fabp7a	E9QEE8	Expressed sequence CO360592	gb	Q8JHI0	Solute carrier family 25 (mitochondrial carrier; adenine nucleotide translocator), member 5 (Solute carrier family 25 alpha, member 5) (Solute carrier family 25 member 5 protein) (Solute carrier family 25, member 5)	slc25a5
Q6PH75	Cathepsin B (Cathepsin B, a) (Cathepsin Ba) (Ctsba)	ctsba	Q7SZQ7	Surfeit locus protein 4	surf4	F1QQC5	Solute carrier family 27 (fatty acid transporter), member 2a	slc27a2a	Q6PBI5	40S ribosomal protein S25	rps25	A0A0G2KUJ0	Uncharacterized protein	unknown	Q6IQA7	Histocompatibility (minor) 13 (Hm13 protein) (Signal peptide peptidase)	hm13
Q7SXW6	Actin-related protein 2-A (Actin-like protein 2-A)	actr2a	E7FAQ8	Heterogeneous nuclear ribonucleoprotein A1a	hnrnpa1a	E7F103	Cytochrome P450, family 2, subfamily X, polypeptide 10.2	cyp2x10	A1A605	Y-box-binding protein 1	ybx1	Q6PBQ4	Reticulon	rtn1a	Q6P6E0	ATP synthase, H+-transporting, mitochondrial F0 complex, subunit g (Atp5l protein)	atp5l
E7FCV8	Collagen, type VI, alpha 2	col6a2	Q1L872	Sulfotransferase (EC 2.8.2.-)	sult3st3	A0A0R4IWP3	Proteasome subunit beta 2	psmb2	F1QH80	Peptidylprolyl isomerase (EC 5.2.1.8)	fkbp2	Q7T3C9	Signal recognition particle 19	srp19	E7FDF9	Zmp:0000000758	zmp
Q6VN46	Myoglobin	mb	Q1RLT1	GMP reductase (GMPR) (EC 1.7.1.7) (Guanosine 5'-monophosphate oxidoreductase) (Guanosine monophosphate reductase)	gmpr2	F1Q911	Zgc:64106	zgc	E9QF69	Ribosomal protein L18	rpl18	F1QI99	Signal recognition particle subunit SRP68 (SRP68)	srp68	Q6P948	Pyruvate dehydrogenase E1 component subunit alpha (EC 1.2.4.1)	pdha1a
E9QFD8	Vitellogenin 4	vtg4	Q6NUZ3	Synaptotagmin-binding, cytoplasmic RNA-interacting protein	syncrip	E9QFU6	Si:ch73-36p18.1	si	I3IRX8	Reticulocalbin 3, EF-hand calcium-binding domain	rcn3	Q1LXR3	Ribosome-binding protein 1b	rrbp1b	Q5SPA3	Acetyl-CoA acetyltransferase 2	acat2
A8KB43	Cerebellin 8 (Zgc:171537 protein)	cbln8	Q6NYQ7	Nicotinamide nucleotide transhydrogenase	nnt	F1RAM4	Zgc:110339	zgc	Q7ZWJ7	60S ribosomal protein L34	rpl34	F1R9Y8	High density lipoprotein-binding protein a	hdlbpa	I3IT87	AP-2 complex subunit mu-B	ap2m1b
Q6AZC1	Proteasome (Prosome, macropain) 26S subunit, ATPase, 5 (Proteasome 26S subunit, ATPase 5) (Psmc5 protein)	psmc5	Q71PD7	Histone H2A.V (H2A.F/Z)	h2afv	Q5TZ82	Cytochrome P450, family 2, subfamily N, polypeptide 13	cyp2n13	F1QV15	Vitellogenin 6 (Fragment)	vtg6	Q6IMW5	Fatty acid-binding protein 6, ileal (gastrotropin)	fabp6	Q6DGX4	Glycine cleavage system H protein	gcshb
F1QK60	Keratin 4	krt4	A0A0F6PK88	Adenylate kinase 2, mitochondrial (AK 2) (EC 2.7.4.3) (ATP-AMP transphosphorylase 2) (ATP:AMP phosphotransferase) (Adenylate monophosphate kinase)	ak2	Q5SPA1	Heme-binding protein 2 (SOUL1)	hebp2	Q1MTC6	Vitellogenin 7	vtg7	Q6NWC3	Ribosomal protein S2	rps2	A0A0R4IP07	Elongation factor 1-gamma	eef1g
Q24JW2	Lysozyme (EC 3.2.1.17)	lyz	F1QLT9	Arginyl-tRNA synthetase	rars	B8JL30	High mobility group box 2a	hmgb2a	H9GXN9	Phosphoethanolamine methyltransferase	pmt	Q6NUW5	Acidic leucine-rich nuclear phosphoprotein 32 family member E	anp32e	A0A0R4IQZ3	Enoyl-CoA delta isomerase 1	eci1
E7F3A5	Si:ch211-212k18.7	si	Q6GQM3	Proteasome subunit alpha type (EC 3.4.25.1)	psma6l	Q568A3	Calpain, small subunit 1 a (Zgc:110603 protein)	capns1a	E9QBV1	Clathrin heavy chain	cltcb	F1R246	Aspartyl-tRNA synthetase	dars	Q6DGA6	Allantoicase (EC 3.5.3.4) (Allantoate amidinohydrolase)	allc
F1RA32	Ependymin-like 1	epdl1	Q7ZUY3	Histone H2AX (H2a/x) (Histone H2A.X)	h2afx	A0A0R4IBN6	Cytochrome P450, family 2, subfamily K, polypeptide 18	cyp2k18	F1QEL0	Transmembrane protein 214	tmem214	Q6NWJ2	Signal peptidase complex subunit 3 (Signal peptidase complex subunit 3 homolog (S. cerevisiae))	spcs3	Q7ZUG6	Ribosomal protein L30	rpl30
F1QFX9	Chymotrypsinogen B1	ctrb1	Q98874	Enhancer of rudimentary homolog	erh	F1R319	Solute carrier family 25 (mitochondrial carrier; oxoglutarate carrier), member 11	slc25a11	Q5BKV9	Ribosomal protein L9 (Rpl9 protein)	rpl9	Q7ZVM6	Cytotoxic granule-associated RNA-binding protein 1,-like	tia1l	Q6AZW2	Alcohol dehydrogenase [NADP(+)] A (EC 1.1.1.2) (Aldehyde reductase-A) (Aldo-keto reductase family 1 member A1-A)	akr1a1a
X1WCG6	Si:dkey-7i4.24	si	Q7T358	G1 to S phase transition 1 (G1 to S phase transition 1,-like)	gspt1l	F1Q8V7	TAP-binding protein (tapasin), tandem duplicate 1	tapbp	Q08C78	Transcription factor BTF3	btf3	Q6IQE2	Eukaryotic translation elongation factor 1 beta 2	eef1b2	Q6PUF3	Hydroxysteroid 11-beta-dehydrogenase 1-like protein (EC 1.1.1.-) (11-beta-hydroxysteroid dehydrogenase type 3) (11-DH3) (11-beta-HSD3)	hsd11b1l
B8JIB4	Aminopeptidase (EC 3.4.11.-)	enpep	F1QCN0	Zgc:112056	zgc	Q1RLY6	Kynurenine 3-monooxygenase (EC 1.14.13.9) (Kynurenine 3-hydroxylase)	kmo	Q6DI20	Dipeptidyl peptidase 3 (EC 3.4.14.4) (Dipeptidyl aminopeptidase III) (Dipeptidyl peptidase III)	dpp3	F1RD77	Nucleophosmin 1b (Fragment)	npm1b	Q6NWJ5	Tubulin alpha chain	tuba8l4
F1Q9R5	STEAP family member 4	steap4	Q7ZW09	Heterogeneous nuclear ribonucleoprotein L (Zgc:55429) (Zgc:55429 protein)	hnrpl	Q641M4	Zgc:100918	zgc	E7EZY3	Pyruvate kinase (EC 2.7.1.40)	unknown	E7EZW6	Signal recognition particle receptor (docking protein)	srpr	F6NGD6	Zgc:101540	slc27a2b
F1R2S5	Vitellogenin 5 (Fragment)	vtg5	B0S5S6	Protein disulfide isomerase family A, member 5	pdia5	F1QYT2	Sulfide quinone reductase-like (yeast)	sqrdl	Q6PC01	40S ribosomal protein S30	faua	Q7ZU67	Eukaryotic translation initiation factor 4A, isoform 1B (Eukaryotic translation initiation factor 4A1B)	eif4a1b	F1QSB3	Signal recognition particle receptor, B subunit	srprb
Q6PBX8	NADH dehydrogenase (ubiquinone) flavoprotein 2 (Zgc:73198)	ndufv2	Q5SPG8	Acyl-CoA thioesterase 20	si	F1R6R2	Si:ch211-270n8.1 (Fragment)	si	Q1LWN2	Vitellogenin 1	vtg1	A0A140LH63	Si:ch73-368j24.12	si	F1QJC1	Dehydrogenase/reductase (SDR family) member 9	dhrs9
Q7SZ53	Pentaxin (Pentraxin)	crp2	R4GEC2	Apobec1 complementation factor	a1cf	F6PBQ1	Dehydrogenase/reductase (SDR family) member 13a, tandem duplicate 1	dhrs13a	Q24JV3	Ribosomal protein L31 (Zgc:136896)	rpl31	Q642H9	40S ribosomal protein S4, X isoform	rps4x	A0A0R4IFJ4	Pyruvate carboxylase (EC 6.4.1.1)	pcxa
Q90485	Hemoglobin subunit beta-2 (Beta-2-globin) (Beta-A2-globin) (Hemoglobin beta-2 chain)	ba2	Q5RHR0	Poly [ADP-ribose] polymerase (PARP) (EC 2.4.2.30)	parp1	A0JMQ6	Cyp4v2 protein (Cytochrome P450, family 4, subfamily V, polypeptide 2) (Cytochrome P450, family 4, subfamily V, polypeptide 8)	cyp4v8	Q90Z10	60S ribosomal protein L13	rpl13	Q6IMW6	Ribosomal protein S13 (Rps13 protein)	rps13	Q6NWE0	Ester hydrolase C11orf54 homolog (EC 3.1.-.-)	zgc
			Q1RLT0	S-adenosylmethionine synthase (EC 2.5.1.6)	mat2al	E7EZE2	STT3B, subunit of the oligosaccharyltransferase complex (catalytic)	stt3b	Q7T1D8	Phb (Phb protein) (Prohibitin)	phb	Q803P2	T-complex 1 (Tcp1 protein)	tcp1	A5PL98	Succinate dehydrogenase [ubiquinone] iron-sulfur subunit, mitochondrial (EC 1.3.5.1) (Iron-sulfur subunit of complex II) (Ip)	sdhb
			Q6NWK3	RAN-binding protein 1 (Ranbp1 protein)	ranbp1	A8KC02	Carbonyl reductase 1-like (LOC792137 protein)	cbr1l	E9QJ40	Family with sequence similarity 120C	fam120c	A7YY10	Zgc:171772 (Zgc:171772 protein)	zgc	E9QCF1	Biliverdin reductase B	blvrb
			Q5XIY2	Transmembrane protein 56-B	tmem56b	A3KPR3	Histone H1-like	histh1l	Q6PC77	ATP synthase subunit d, mitochondrial	atp5h	Q66HV4	Coatomer subunit beta (Beta-coat protein) (Beta-COP)	copb1	B0UYS4	Deoxyribose-phosphate aldolase (putative)	dera
			Q6DRI1	Eukaryotic translation initiation factor 3 subunit E-A (eIF3e-A) (Eukaryotic translation initiation factor 3 subunit 6-A)	eif3ea	Q7T387	Abhydrolase domain-containing 14B (Zgc:64031)	abhd14b	Q6PC80	Ribosomal protein S5	rps5	Q6TH14	Enolase 1, (Alpha) (Enolase 3, (beta, muscle))	eno3	A3KQE8	Phosphoribosyl pyrophosphate synthetase 1A	prps1a
			Q4KMD5	Lysophosphatidylglycerol acyltransferase 1 (Si:dkey-30h14.2)	lpgat1	Q66I16	Electron-transferring-flavoprotein dehydrogenase (Zgc:92093)	etfdh	Q7ZV82	60S ribosomal protein L27	rpl27	Q6PBZ1	Ribosomal protein L7a	rpl7a	A0A0R4IGT3	Dolichyl-phosphate mannosyltransferase polypeptide 1, catalytic subunit	dpm1
			B0UYN4	Zgc:162944	zgc	E9QDH1	Cytochrome c oxidase subunit VIIa polypeptide 1 (muscle)	cox7a1	F1Q7L0	Vitellogenin 4 (Fragment)	vtg4	P61485	60S ribosomal protein L36a	rpl36a	E7EZ94	Glutathione S-transferase theta 1a	gstt1a
			Q6P016	Purine nucleoside phosphorylase (EC 2.4.2.1) (Inosine-guanosine phosphorylase)	pnp4b	F1R7E6	Iodothyronine deiodinase	dio1	A8KB78	Ribosomal protein S23 (Zgc:171710) (Zgc:171710 protein)	rps23	B8A4D7	Ribosome-binding protein 1a	rrbp1a	I3IRW7	4-aminobutyrate aminotransferase	abat
			A0A0R4IXZ6	Eukaryotic translation initiation factor 4h	eif4h	E9QDD3	UDP-glucuronosyltransferase (EC 2.4.1.17) (Fragment)	ugt5d1	Q803G3	Serine/threonine-protein phosphatase (EC 3.1.3.16)	ppp2cb	B0UYE4	O-acyltransferase	soat1	Q1LY08	Coproporphyrinogen oxidase	cpox
			A0A0R4IMA6	Methylenetetrahydrofolate dehydrogenase (NADP+-dependent) 1b	mthfd1b	Q98T96	Cytochrome P450 (Cytochrome P450, family 2, subfamily AD, polypeptide 2)	cyp2ad2	E9QIR9	60S ribosomal protein L10 (Fragment)	rpl10	Q6P5K3	60S acidic ribosomal protein P0	rplp0	Q6P2V4	Hgd protein (Homogentisate 1,2-dioxygenase)	hgd
			F1R9P3	Tetratricopeptide repeat protein 38 (Fragment)	ttc38	F6NYT7	Glutathione peroxidase	gpx1a	Q90486	Hemoglobin subunit beta-1 (Beta-1-globin) (Beta-A1-globin) (Hemoglobin beta-1 chain)	ba1	B7ZD32	40S ribosomal protein S24	rps24	E7FD66	Aminoadipate-semialdehyde synthase	aass
			Q0P4F7	Acyl-CoA synthetase family member 2, mitochondrial (EC 6.2.1.-)	acsf2	B0UYB4	Si:dkey-91i10.3	si	Q7ZUG5	40S ribosomal protein S21	rps21	Q7T1J9	Ribosomal protein S10	rps10	Q6NYL5	Alanine aminotransferase 2-like (ALT2) (EC 2.6.1.2) (Glutamate pyruvate transaminase 2) (GPT 2) (Glutamic--alanine transaminase 2) (Glutamic--pyruvic transaminase 2)	gpt2l
			Q6DRC4	Eukaryotic translation initiation factor 3 subunit G (eIF3g) (Eukaryotic translation initiation factor 3 RNA-binding subunit) (eIF-3 RNA-binding subunit) (Eukaryotic translation initiation factor 3 subunit 4)	eif3g	F1QDW6	Transmembrane protein 97	tmem97	F1R966	Clathrin heavy chain	cltca	P79735	GTP-binding nuclear protein Ran (GTPase Ran) (Ras-related nuclear protein)	ran	Q7T337	Fructose-1,6-bisphosphatase 1b	fbp1b
			E9QEB6	ADP-ribosylation factor 2b (Fragment)	arf2b	F1R4U0	Slc25a1 solute carrier family 25 (mitochondrial carrier; citrate transporter), member 1b	slc25a1b	Q7T1K0	Ribosomal protein L17 (Zgc:65996)	rpl17	Q6DGH3	Protein transport protein Sec61 subunit beta	sec61b	H9GXR0	Uncharacterized protein	unknown
			F6P8R2	Oxysterol-binding protein	osbp	Q5TZD2	Peroxiredoxin 6	prdx6	A8WGC6	ATP synthase subunit beta (EC 3.6.3.14)	atp5b	A0A0R4I9K9	Phospholipase A2, group XIIB	pla2g12b	F1QTW8	Matrin 3-like 1.1 (Fragment)	matr3l1
			Q7T2V2	Cytosolic sulfotransferase 3 (EC 2.8.2.-) (SULT1 ST3)	sult1st3	Q6DHT4	Aldehyde dehydrogenase 6 family, member A1 (Zgc:92082)	aldh6a1	F1Q9T9	Ribosomal protein L23a (Fragment)	rpl23a	F1Q5Q3	SERPINE1 mRNA-binding protein 1a	serbp1a	F1R3V8	Coiled-coil domain-containing protein 47	ccdc47
			R4GEY3	Si:ch211-113a14.18	si	A8KBV1	Succinyl-CoA:3-ketoacid-coenzyme A transferase (EC 2.8.3.5)	oxct1b	Q24JV1	Ribosomal protein L32 (Zgc:136952)	rpl32	A8E7N8	Proteasome subunit beta (EC 3.4.25.1)	psmb4	F1Q6E1	4-hydroxyphenylpyruvate dioxygenase	hpda
			Q7ZW04	S-adenosylmethionine synthase (EC 2.5.1.6)	mat1a	F1R1P2	UDP glucuronosyltransferase 1 family a, b	ugt1ab	Q7ZUZ2	ARP1 actin-related protein 1, centractin (Zgc:56317)	actr1	Q6NYV3	H1 histone family, member 0 (Zgc:65861)	h1f0	Q6NV37	Glycogenin 1 (Glycogenin 1a) (Gyg1 protein)	gyg1a
			Q6NXA6	S-(hydroxymethyl)glutathione dehydrogenase (EC 1.1.1.284)	adh5	F1QZU7	Aldehyde dehydrogenase 2 family (mitochondrial), tandem duplicate 2	aldh2	R4GEX4	Eukaryotic translation initiation factor 3, subunit F (Fragment)	eif3f	Q5RGK8	Staphylococcal nuclease domain-containing protein 1	snd1	B0S5C5	Acetyl-CoA acyltransferase 2	acaa2
			Q6NXC1	RNA-binding motif protein 4.3 (Zgc:56141)	rbm4	Q6P009	D-amino-acid oxidase 3 (D-amino-acid oxidase, tandem duplicate 3)	dao	Q6DHB9	Saccharopine dehydrogenase a	sccpdha	E9QCY4	Nuclear protein 1	nupr1	F1QEJ5	Ubiquinol-cytochrome c reductase, complex III subunit VII	uqcrq
			I3ISH4	Lysophospholipase II	lypla2	B8JI00	Succinate--CoA ligase [ADP/GDP-forming] subunit alpha, mitochondrial (EC 6.2.1.4) (EC 6.2.1.5) (Succinyl-CoA synthetase subunit alpha) (SCS-alpha)	suclg1				Q6Q417	Ribosomal protein L7	rpl7	Q5U3G0	Progesterone receptor membrane component 1	pgrmc1
			Q8AX99	Actinin alpha 3b (Actn3b) (Alpha-actinin) (Novel actinin)	actn3b	A0A0R4IIZ7	Heterogeneous nuclear ribonucleoprotein A/Bb	hnrnpabb				Q9I8V1	Actin, alpha 1, skeletal muscle (Actin, alpha, cardiac muscle 1b) (Skeletal alpha1 actin)	actc1b	Q7SXK5	Probable imidazolonepropionase (EC 3.5.2.7) (Amidohydrolase domain-containing protein 1)	amdhd1
			Q7ZTT8	NADH dehydrogenase (ubiquinone) 1 alpha subcomplex 4,-like	ndufa4l	Q6PHD9	Selenium-binding protein 1	selenbp1				A0A0R4I9F5	Dolichyl-diphosphooligosaccharide--protein glycosyltransferase 48 kDa subunit (Oligosaccharyl transferase 48 kDa subunit)	ddost	A0A0R4IUZ2	Aldehyde dehydrogenase 2 family (mitochondrial), tandem duplicate 1	aldh2
			A0A140LGU1	Heterochromatin protein 1,-binding protein 3	hp1bp3	Q568L5	Alcohol dehydrogenase [NADP(+)] B (EC 1.1.1.2) (Aldehyde reductase-B) (Aldo-keto reductase family 1 member A1-B)	akr1a1b				Q6P3J5	Eukaryotic translation elongation factor 2 (Eukaryotic translation elongation factor 2, like) (Eukaryotic translation elongation factor 2b)	eef2b	A0A0G2L6T1	Electron transfer flavoprotein alpha subunit	unknown
			Q5PRA2	Probable 2-oxoglutarate dehydrogenase E1 component DHKTD1, mitochondrial (EC 1.2.4.2) (Dehydrogenase E1 and transketolase domain-containing protein 1)	dhtkd1	A3KPR4	Histone H4	si				E9QHX8	Signal sequence receptor, delta	ssr4	F8W4R3	Adenine phosphoribosyltransferase	aprt
			F1QCW3	Si:ch211-107o10.3	si	A5WV37	Myeloid-derived growth factor	mydgf				Q7ZV05	Ribosomal protein S11	rps11	B8JIS1	ATP synthase, H+-transporting, mitochondrial Fo complex, subunit B1	atp5f1
			F1Q884	Glycine N-methyltransferase (EC 2.1.1.20)	gnmt	Q6AZA0	Acetyl-CoA acetyltransferase, mitochondrial (EC 2.3.1.9) (Acetoacetyl-CoA thiolase)	acat1				Q6DGU9	Glutathione S-transferase kappa (EC 2.5.1.18)	gstk1	A7E2L0	Dolichyl-diphosphooligosaccharide--protein glycosyltransferase subunit DAD1 (Oligosaccharyl transferase subunit DAD1)	dad1
			Q6PBJ8	Peptidylprolyl isomerase (EC 5.2.1.8)	fkbp1aa	F6P2R4	Glycine C-acetyltransferase	gcat				P62247	40S ribosomal protein S8	rps8	E7F1Y3	Si:zfos-411a11.2	si
			Q7T1D7	Flavin-containing monooxygenase (EC 1.-.-.-)	fmo5	A0A0R4IPA1	Calcium-activated nucleotidase 1b (Fragment)	cant1b				F1QPA8	Sulfotransferase (EC 2.8.2.-)	sult3st1	Q6IQM2	Cytochrome c	cyc
			Q642J0	Histidine triad nucleotide-binding protein 1 (Zgc:103764) (Zgc:103764 protein)	hint1	F1QCE3	Peroxiredoxin 5	prdx5				F1QHJ4	Death-associated protein	dap
			Q7SXN2	Heterogeneous nuclear ribonucleoprotein D-like	hnrpdl	F8W5T8	Zgc:152945	zgc				A0A0G2L3Z2	Thymidine phosphorylase (TP) (EC 2.4.2.4) (TdRPase)	tymp
			Q5U386	Protein phosphatase 1A, magnesium dependent, alpha isoform (Protein phosphatase, Mg2+/Mn2+-dependent, 1Bb)	ppm1bb							Q6P5M9	Tubulin beta chain	tubb4b
			Q6NX98	ST13, Hsp70-interacting protein (Suppression of tumorigenicity 13 (Colon carcinoma) (Hsp70 interacting protein))	st13							F1R7X5	Succinate--CoA ligase [GDP-forming] subunit beta, mitochondrial (EC 6.2.1.4) (GTP-specific succinyl-CoA synthetase subunit beta) (G-SCS) (GTPSCS) (Succinyl-CoA synthetase beta-G chain) (SCS-betaG)	suclg2
			A0A0R4IN76	Glucan (1,4-alpha-),-branching enzyme 1b (Fragment)	gbe1b							A0A0R4IGQ7	Peptidylprolyl isomerase (EC 5.2.1.8)	fkbp3
			Q6TH32	Cofilin 1 (Muscle cofilin 2)	cfl1							F1QTL9	Heterogeneous nuclear ribonucleoprotein A0b	hnrnpa0b
			Q7ZZJ7	Anion exchange protein	slc4a1a							Q6GQN6	Acaa1 protein (Acetyl-CoA acyltransferase 1) (Acetyl-Coenzyme A acyltransferase 1)	acaa1
			B0S5D9	Transmembrane 9 superfamily member	tm9sf2							F1QUE3	Ubiquinol-cytochrome c reductase core protein 1	uqcrc1
			A0A0R4ITM4	Deleted.	cirbpb							Q803F6	40S ribosomal protein SA (37 kDa laminin receptor precursor) (37LRP) (37/67 kDa laminin receptor) (LRP/LR) (67 kDa laminin receptor) (67LR) (Laminin receptor 1) (LamR) (Laminin-binding protein precursor p40) (LBP/p40)	rpsa
			E7FCQ0	CCHC-type zinc finger, nucleic acid-binding protein b	cnbpb							F1QUQ7	Proteasome 26S subunit, ATPase 3	psmc3
			Q7T2F5	N-ethylmaleimide sensitive fusion protein attachment protein alpha (N-ethylmaleimide-sensitive factor attachment protein, alpha) (N-ethylmaleimide-sensitive factor attachment protein, alpha b)	napab							F1QFW5	Ribophorin II (Fragment)	rpn2
			B0UY94	Eukaryotic translation initiation factor 5A (eIF-5A) (Fragment)	eif5a2							Q6PBX2	SAR1a gene homolog 2 (S. cerevisiae) (Secretion-associated, Ras-related GTPase 1B)	sar1b
			A0A0R4INN3	Alanine--glyoxylate aminotransferase 2	agxt2							Q6ZM23	Cytochrome c oxidase subunit VIc	cox6c
			Q5XJS3	Sterol carrier protein 2b (Zgc:101621)	scp2b							Q8JGR4	60S ribosomal protein L24	rpl24
			Q6DRD2	26S protease regulatory subunit S10B (Proteasome (Prosome, macropain) 26S subunit, ATPase, 6) (Proteasome 26S subunit, ATPase 6) (Psmc6 protein)	psmc6							F1QHJ1	40S ribosomal protein S26	rps26l
			Q566W6	Cold-inducible RNA-binding protein a (Zgc:112425) (Zgc:112425 protein)	cirbpa							Q499B2	Signal peptidase complex subunit 1 (Signal peptidase complex subunit 1 homolog (S. cerevisiae))	spcs1
			A5PN40	Crystallin, zeta (quinone reductase) (Fragment)	cryz							E9QD12	Dicarbonyl/L-xylulose reductase (Fragment)	dcxr
												Q08BS3	Retinoblastoma-binding protein 9 (Si:ch211-258l4.7)	rbbp9
												Q8AYH1	17-beta-hydroxysteroid dehydrogenase type 4 (Hsd17b4 protein) (Hydroxysteroid (17-beta) dehydrogenase 4)	hsd17b4
												B0R1D0	Novel protein (Zgc:63709) (Proteasome 26S subunit, ATPase 4)	psmc4
												Q7SXP0	Vesicle-trafficking protein SEC22b-B (SEC22 vesicle-trafficking protein homolog B-B)	sec22bb
												A0A0R4IYD0	40S ribosomal protein S27	zgc
												F1QG78	Phosphatidylinositide phosphatase SAC1-B	sacm1lb
												A0A0R4IPH2	Tubulin beta chain	tubb4b
												Q6P5K5	Ribosomal protein, large, P1	rplp1
												Q6DGL9	Ribosomal protein L38 (Rpl38 protein)	rpl38
												Q6Q415	60S ribosomal protein L36	rpl36

## Sheet: Cluster 1
Protein accession	Protein name	Gene name
Q5RI57	Novel protein (Si:ch211-240l19.8)	si
B8JI17	Prosaposin	psap
Q6NWC1	Vdac1 protein (Voltage-dependent anion channel 1)	vdac1
Q66HW9	Chymotrypsin-like	ctrl
B3DFS9	Myosin, heavy chain 11a, smooth muscle (Myosin, heavy polypeptide 11, smooth muscle)	myh11a
Q6PH75	Cathepsin B (Cathepsin B, a) (Cathepsin Ba) (Ctsba)	ctsba
Q7SXW6	Actin-related protein 2-A (Actin-like protein 2-A)	actr2a
E7FCV8	Collagen, type VI, alpha 2	col6a2
Q6VN46	Myoglobin	mb
E9QFD8	Vitellogenin 4	vtg4
A8KB43	Cerebellin 8 (Zgc:171537 protein)	cbln8
Q6AZC1	Proteasome (Prosome, macropain) 26S subunit, ATPase, 5 (Proteasome 26S subunit, ATPase 5) (Psmc5 protein)	psmc5
F1QK60	Keratin 4	krt4
Q24JW2	Lysozyme (EC 3.2.1.17)	lyz
E7F3A5	Si:ch211-212k18.7	si
F1RA32	Ependymin-like 1	epdl1
F1QFX9	Chymotrypsinogen B1	ctrb1
X1WCG6	Si:dkey-7i4.24	si
B8JIB4	Aminopeptidase (EC 3.4.11.-)	enpep
F1Q9R5	STEAP family member 4	steap4
F1R2S5	Vitellogenin 5 (Fragment)	vtg5
Q6PBX8	NADH dehydrogenase (ubiquinone) flavoprotein 2 (Zgc:73198)	ndufv2
Q7SZ53	Pentaxin (Pentraxin)	crp2
Q90485	Hemoglobin subunit beta-2 (Beta-2-globin) (Beta-A2-globin) (Hemoglobin beta-2 chain)	ba2

## Sheet: Cluster 2
Protein accession	Protein name	Gene name
A0A0R4IA30	Eukaryotic translation elongation factor 1 delta a (guanine nucleotide exchange protein)	eef1da
Q7ZV34	Malignant T-cell-amplified sequence 1 (MCT-1)	mcts1
Q6P4V5	Sterol carrier protein 2 (Sterol carrier protein 2a)	scp2a
Q9PUE4	Coatomer subunit gamma-2 (Gamma-2-coat protein) (Gamma-2-COP)	copg2
Q0P4B4	Transgelin	tagln
Q7SZQ7	Surfeit locus protein 4	surf4
E7FAQ8	Heterogeneous nuclear ribonucleoprotein A1a	hnrnpa1a
Q1L872	Sulfotransferase (EC 2.8.2.-)	sult3st3
Q1RLT1	GMP reductase (GMPR) (EC 1.7.1.7) (Guanosine 5'-monophosphate oxidoreductase) (Guanosine monophosphate reductase)	gmpr2
Q6NUZ3	Synaptotagmin-binding, cytoplasmic RNA-interacting protein	syncrip
Q6NYQ7	Nicotinamide nucleotide transhydrogenase	nnt
Q71PD7	Histone H2A.V (H2A.F/Z)	h2afv
A0A0F6PK88	Adenylate kinase 2, mitochondrial (AK 2) (EC 2.7.4.3) (ATP-AMP transphosphorylase 2) (ATP:AMP phosphotransferase) (Adenylate monophosphate kinase)	ak2
F1QLT9	Arginyl-tRNA synthetase	rars
Q6GQM3	Proteasome subunit alpha type (EC 3.4.25.1)	psma6l
Q7ZUY3	Histone H2AX (H2a/x) (Histone H2A.X)	h2afx
Q98874	Enhancer of rudimentary homolog	erh
Q7T358	G1 to S phase transition 1 (G1 to S phase transition 1,-like)	gspt1l
F1QCN0	Zgc:112056	zgc
Q7ZW09	Heterogeneous nuclear ribonucleoprotein L (Zgc:55429) (Zgc:55429 protein)	hnrpl
B0S5S6	Protein disulfide isomerase family A, member 5	pdia5
Q5SPG8	Acyl-CoA thioesterase 20	si
R4GEC2	Apobec1 complementation factor	a1cf
Q5RHR0	Poly [ADP-ribose] polymerase (PARP) (EC 2.4.2.30)	parp1
Q1RLT0	S-adenosylmethionine synthase (EC 2.5.1.6)	mat2al
Q6NWK3	RAN-binding protein 1 (Ranbp1 protein)	ranbp1
Q5XIY2	Transmembrane protein 56-B	tmem56b
Q6DRI1	Eukaryotic translation initiation factor 3 subunit E-A (eIF3e-A) (Eukaryotic translation initiation factor 3 subunit 6-A)	eif3ea
Q4KMD5	Lysophosphatidylglycerol acyltransferase 1 (Si:dkey-30h14.2)	lpgat1
B0UYN4	Zgc:162944	zgc
Q6P016	Purine nucleoside phosphorylase (EC 2.4.2.1) (Inosine-guanosine phosphorylase)	pnp4b
A0A0R4IXZ6	Eukaryotic translation initiation factor 4h	eif4h
A0A0R4IMA6	Methylenetetrahydrofolate dehydrogenase (NADP+-dependent) 1b	mthfd1b
F1R9P3	Tetratricopeptide repeat protein 38 (Fragment)	ttc38
Q0P4F7	Acyl-CoA synthetase family member 2, mitochondrial (EC 6.2.1.-)	acsf2
Q6DRC4	Eukaryotic translation initiation factor 3 subunit G (eIF3g) (Eukaryotic translation initiation factor 3 RNA-binding subunit) (eIF-3 RNA-binding subunit) (Eukaryotic translation initiation factor 3 subunit 4)	eif3g
E9QEB6	ADP-ribosylation factor 2b (Fragment)	arf2b
F6P8R2	Oxysterol-binding protein	osbp
Q7T2V2	Cytosolic sulfotransferase 3 (EC 2.8.2.-) (SULT1 ST3)	sult1st3
R4GEY3	Si:ch211-113a14.18	si
Q7ZW04	S-adenosylmethionine synthase (EC 2.5.1.6)	mat1a
Q6NXA6	S-(hydroxymethyl)glutathione dehydrogenase (EC 1.1.1.284)	adh5
Q6NXC1	RNA-binding motif protein 4.3 (Zgc:56141)	rbm4
I3ISH4	Lysophospholipase II	lypla2
Q8AX99	Actinin alpha 3b (Actn3b) (Alpha-actinin) (Novel actinin)	actn3b
Q7ZTT8	NADH dehydrogenase (ubiquinone) 1 alpha subcomplex 4,-like	ndufa4l
A0A140LGU1	Heterochromatin protein 1,-binding protein 3	hp1bp3
Q5PRA2	Probable 2-oxoglutarate dehydrogenase E1 component DHKTD1, mitochondrial (EC 1.2.4.2) (Dehydrogenase E1 and transketolase domain-containing protein 1)	dhtkd1
F1QCW3	Si:ch211-107o10.3	si
F1Q884	Glycine N-methyltransferase (EC 2.1.1.20)	gnmt
Q6PBJ8	Peptidylprolyl isomerase (EC 5.2.1.8)	fkbp1aa
Q7T1D7	Flavin-containing monooxygenase (EC 1.-.-.-)	fmo5
Q642J0	Histidine triad nucleotide-binding protein 1 (Zgc:103764) (Zgc:103764 protein)	hint1
Q7SXN2	Heterogeneous nuclear ribonucleoprotein D-like	hnrpdl
Q5U386	Protein phosphatase 1A, magnesium dependent, alpha isoform (Protein phosphatase, Mg2+/Mn2+-dependent, 1Bb)	ppm1bb
Q6NX98	ST13, Hsp70-interacting protein (Suppression of tumorigenicity 13 (Colon carcinoma) (Hsp70 interacting protein))	st13
A0A0R4IN76	Glucan (1,4-alpha-),-branching enzyme 1b (Fragment)	gbe1b
Q6TH32	Cofilin 1 (Muscle cofilin 2)	cfl1
Q7ZZJ7	Anion exchange protein	slc4a1a
B0S5D9	Transmembrane 9 superfamily member	tm9sf2
A0A0R4ITM4	Deleted.	cirbpb
E7FCQ0	CCHC-type zinc finger, nucleic acid-binding protein b	cnbpb
Q7T2F5	N-ethylmaleimide sensitive fusion protein attachment protein alpha (N-ethylmaleimide-sensitive factor attachment protein, alpha) (N-ethylmaleimide-sensitive factor attachment protein, alpha b)	napab
B0UY94	Eukaryotic translation initiation factor 5A (eIF-5A) (Fragment)	eif5a2
A0A0R4INN3	Alanine--glyoxylate aminotransferase 2	agxt2
Q5XJS3	Sterol carrier protein 2b (Zgc:101621)	scp2b
Q6DRD2	26S protease regulatory subunit S10B (Proteasome (Prosome, macropain) 26S subunit, ATPase, 6) (Proteasome 26S subunit, ATPase 6) (Psmc6 protein)	psmc6
Q566W6	Cold-inducible RNA-binding protein a (Zgc:112425) (Zgc:112425 protein)	cirbpa
A5PN40	Crystallin, zeta (quinone reductase) (Fragment)	cryz

## Sheet: Cluster 3
Protein accession	Protein name	Gene name
Q6P0V8	Annexin	anxa5b
Q05AJ2	Methyltransferase-like 7A (Zgc:153889)	mettl7a
E7F238	Solute carrier family 25 (mitochondrial carrier; dicarboxylate transporter), member 10	slc25a10
F1QSM3	Cytochrome P450, family 2, subfamily X, polypeptide 7	cyp2x7
A3KPS7	UDP-glucuronosyltransferase (EC 2.4.1.17) (Fragment)	ugt5c2
F1QQC5	Solute carrier family 27 (fatty acid transporter), member 2a	slc27a2a
E7F103	Cytochrome P450, family 2, subfamily X, polypeptide 10.2	cyp2x10
A0A0R4IWP3	Proteasome subunit beta 2	psmb2
F1Q911	Zgc:64106	zgc
E9QFU6	Si:ch73-36p18.1	si
F1RAM4	Zgc:110339	zgc
Q5TZ82	Cytochrome P450, family 2, subfamily N, polypeptide 13	cyp2n13
Q5SPA1	Heme-binding protein 2 (SOUL1)	hebp2
B8JL30	High mobility group box 2a	hmgb2a
Q568A3	Calpain, small subunit 1 a (Zgc:110603 protein)	capns1a
A0A0R4IBN6	Cytochrome P450, family 2, subfamily K, polypeptide 18	cyp2k18
F1R319	Solute carrier family 25 (mitochondrial carrier; oxoglutarate carrier), member 11	slc25a11
F1Q8V7	TAP-binding protein (tapasin), tandem duplicate 1	tapbp
Q1RLY6	Kynurenine 3-monooxygenase (EC 1.14.13.9) (Kynurenine 3-hydroxylase)	kmo
Q641M4	Zgc:100918	zgc
F1QYT2	Sulfide quinone reductase-like (yeast)	sqrdl
F1R6R2	Si:ch211-270n8.1 (Fragment)	si
F6PBQ1	Dehydrogenase/reductase (SDR family) member 13a, tandem duplicate 1	dhrs13a
A0JMQ6	Cyp4v2 protein (Cytochrome P450, family 4, subfamily V, polypeptide 2) (Cytochrome P450, family 4, subfamily V, polypeptide 8)	cyp4v8
E7EZE2	STT3B, subunit of the oligosaccharyltransferase complex (catalytic)	stt3b
A8KC02	Carbonyl reductase 1-like (LOC792137 protein)	cbr1l
A3KPR3	Histone H1-like	histh1l
Q7T387	Abhydrolase domain-containing 14B (Zgc:64031)	abhd14b
Q66I16	Electron-transferring-flavoprotein dehydrogenase (Zgc:92093)	etfdh
E9QDH1	Cytochrome c oxidase subunit VIIa polypeptide 1 (muscle)	cox7a1
F1R7E6	Iodothyronine deiodinase	dio1
E9QDD3	UDP-glucuronosyltransferase (EC 2.4.1.17) (Fragment)	ugt5d1
Q98T96	Cytochrome P450 (Cytochrome P450, family 2, subfamily AD, polypeptide 2)	cyp2ad2
F6NYT7	Glutathione peroxidase	gpx1a
B0UYB4	Si:dkey-91i10.3	si
F1QDW6	Transmembrane protein 97	tmem97
F1R4U0	Slc25a1 solute carrier family 25 (mitochondrial carrier; citrate transporter), member 1b	slc25a1b
Q5TZD2	Peroxiredoxin 6	prdx6
Q6DHT4	Aldehyde dehydrogenase 6 family, member A1 (Zgc:92082)	aldh6a1
A8KBV1	Succinyl-CoA:3-ketoacid-coenzyme A transferase (EC 2.8.3.5)	oxct1b
F1R1P2	UDP glucuronosyltransferase 1 family a, b	ugt1ab
F1QZU7	Aldehyde dehydrogenase 2 family (mitochondrial), tandem duplicate 2	aldh2
Q6P009	D-amino-acid oxidase 3 (D-amino-acid oxidase, tandem duplicate 3)	dao
B8JI00	Succinate--CoA ligase [ADP/GDP-forming] subunit alpha, mitochondrial (EC 6.2.1.4) (EC 6.2.1.5) (Succinyl-CoA synthetase subunit alpha) (SCS-alpha)	suclg1
A0A0R4IIZ7	Heterogeneous nuclear ribonucleoprotein A/Bb	hnrnpabb
Q6PHD9	Selenium-binding protein 1	selenbp1
Q568L5	Alcohol dehydrogenase [NADP(+)] B (EC 1.1.1.2) (Aldehyde reductase-B) (Aldo-keto reductase family 1 member A1-B)	akr1a1b
A3KPR4	Histone H4	si
A5WV37	Myeloid-derived growth factor	mydgf
Q6AZA0	Acetyl-CoA acetyltransferase, mitochondrial (EC 2.3.1.9) (Acetoacetyl-CoA thiolase)	acat1
F6P2R4	Glycine C-acetyltransferase	gcat
A0A0R4IPA1	Calcium-activated nucleotidase 1b (Fragment)	cant1b
F1QCE3	Peroxiredoxin 5	prdx5
F8W5T8	Zgc:152945	zgc

## Sheet: Cluster 4
Protein accession	Protein name	Gene name
Q1LYB7	Ribosomal protein L13a	rpl13a
Q6DH65	Density-regulated protein (DRP)	denr
F1QTN8	Un-named hu7910	unm_hu7910
Q5BLE6	Zgc:113054	zgc
F8W3N3	Fatty acid-binding protein 7, brain, a	fabp7a
Q6PBI5	40S ribosomal protein S25	rps25
A1A605	Y-box-binding protein 1	ybx1
F1QH80	Peptidylprolyl isomerase (EC 5.2.1.8)	fkbp2
E9QF69	Ribosomal protein L18	rpl18
I3IRX8	Reticulocalbin 3, EF-hand calcium-binding domain	rcn3
Q7ZWJ7	60S ribosomal protein L34	rpl34
F1QV15	Vitellogenin 6 (Fragment)	vtg6
Q1MTC6	Vitellogenin 7	vtg7
H9GXN9	Phosphoethanolamine methyltransferase	pmt
E9QBV1	Clathrin heavy chain	cltcb
F1QEL0	Transmembrane protein 214	tmem214
Q5BKV9	Ribosomal protein L9 (Rpl9 protein)	rpl9
Q08C78	Transcription factor BTF3	btf3
Q6DI20	Dipeptidyl peptidase 3 (EC 3.4.14.4) (Dipeptidyl aminopeptidase III) (Dipeptidyl peptidase III)	dpp3
E7EZY3	Pyruvate kinase (EC 2.7.1.40)	unknown
Q6PC01	40S ribosomal protein S30	faua
Q1LWN2	Vitellogenin 1	vtg1
Q24JV3	Ribosomal protein L31 (Zgc:136896)	rpl31
Q90Z10	60S ribosomal protein L13	rpl13
Q7T1D8	Phb (Phb protein) (Prohibitin)	phb
E9QJ40	Family with sequence similarity 120C	fam120c
Q6PC77	ATP synthase subunit d, mitochondrial	atp5h
Q6PC80	Ribosomal protein S5	rps5
Q7ZV82	60S ribosomal protein L27	rpl27
F1Q7L0	Vitellogenin 4 (Fragment)	vtg4
A8KB78	Ribosomal protein S23 (Zgc:171710) (Zgc:171710 protein)	rps23
Q803G3	Serine/threonine-protein phosphatase (EC 3.1.3.16)	ppp2cb
E9QIR9	60S ribosomal protein L10 (Fragment)	rpl10
Q90486	Hemoglobin subunit beta-1 (Beta-1-globin) (Beta-A1-globin) (Hemoglobin beta-1 chain)	ba1
Q7ZUG5	40S ribosomal protein S21	rps21
F1R966	Clathrin heavy chain	cltca
Q7T1K0	Ribosomal protein L17 (Zgc:65996)	rpl17
A8WGC6	ATP synthase subunit beta (EC 3.6.3.14)	atp5b
F1Q9T9	Ribosomal protein L23a (Fragment)	rpl23a
Q24JV1	Ribosomal protein L32 (Zgc:136952)	rpl32
Q7ZUZ2	ARP1 actin-related protein 1, centractin (Zgc:56317)	actr1
R4GEX4	Eukaryotic translation initiation factor 3, subunit F (Fragment)	eif3f
Q6DHB9	Saccharopine dehydrogenase a	sccpdha

## Sheet: Cluster 5
Protein accession	Protein name	Gene name
X1WBU0	Glutathione S-transferase zeta 1	gstz1
E7F881	Abhydrolase domain-containing 6a	abhd6a
Q7ZSY6	Metallothionein-2 (MT-2)	mt2
F1QDA6	Acyl-CoA synthetase long chain family member 1b	acsl1b
E9QEE8	Expressed sequence CO360592	gb
A0A0G2KUJ0	Uncharacterized protein	unknown
Q6PBQ4	Reticulon	rtn1a
Q7T3C9	Signal recognition particle 19	srp19
F1QI99	Signal recognition particle subunit SRP68 (SRP68)	srp68
Q1LXR3	Ribosome-binding protein 1b	rrbp1b
F1R9Y8	High density lipoprotein-binding protein a	hdlbpa
Q6IMW5	Fatty acid-binding protein 6, ileal (gastrotropin)	fabp6
Q6NWC3	Ribosomal protein S2	rps2
Q6NUW5	Acidic leucine-rich nuclear phosphoprotein 32 family member E	anp32e
F1R246	Aspartyl-tRNA synthetase	dars
Q6NWJ2	Signal peptidase complex subunit 3 (Signal peptidase complex subunit 3 homolog (S. cerevisiae))	spcs3
Q7ZVM6	Cytotoxic granule-associated RNA-binding protein 1,-like	tia1l
Q6IQE2	Eukaryotic translation elongation factor 1 beta 2	eef1b2
F1RD77	Nucleophosmin 1b (Fragment)	npm1b
E7EZW6	Signal recognition particle receptor (docking protein)	srpr
Q7ZU67	Eukaryotic translation initiation factor 4A, isoform 1B (Eukaryotic translation initiation factor 4A1B)	eif4a1b
A0A140LH63	Si:ch73-368j24.12	si
Q642H9	40S ribosomal protein S4, X isoform	rps4x
Q6IMW6	Ribosomal protein S13 (Rps13 protein)	rps13
Q803P2	T-complex 1 (Tcp1 protein)	tcp1
A7YY10	Zgc:171772 (Zgc:171772 protein)	zgc
Q66HV4	Coatomer subunit beta (Beta-coat protein) (Beta-COP)	copb1
Q6TH14	Enolase 1, (Alpha) (Enolase 3, (beta, muscle))	eno3
Q6PBZ1	Ribosomal protein L7a	rpl7a
P61485	60S ribosomal protein L36a	rpl36a
B8A4D7	Ribosome-binding protein 1a	rrbp1a
B0UYE4	O-acyltransferase	soat1
Q6P5K3	60S acidic ribosomal protein P0	rplp0
B7ZD32	40S ribosomal protein S24	rps24
Q7T1J9	Ribosomal protein S10	rps10
P79735	GTP-binding nuclear protein Ran (GTPase Ran) (Ras-related nuclear protein)	ran
Q6DGH3	Protein transport protein Sec61 subunit beta	sec61b
A0A0R4I9K9	Phospholipase A2, group XIIB	pla2g12b
F1Q5Q3	SERPINE1 mRNA-binding protein 1a	serbp1a
A8E7N8	Proteasome subunit beta (EC 3.4.25.1)	psmb4
Q6NYV3	H1 histone family, member 0 (Zgc:65861)	h1f0
Q5RGK8	Staphylococcal nuclease domain-containing protein 1	snd1
E9QCY4	Nuclear protein 1	nupr1
Q6Q417	Ribosomal protein L7	rpl7
Q9I8V1	Actin, alpha 1, skeletal muscle (Actin, alpha, cardiac muscle 1b) (Skeletal alpha1 actin)	actc1b
A0A0R4I9F5	Dolichyl-diphosphooligosaccharide--protein glycosyltransferase 48 kDa subunit (Oligosaccharyl transferase 48 kDa subunit)	ddost
Q6P3J5	Eukaryotic translation elongation factor 2 (Eukaryotic translation elongation factor 2, like) (Eukaryotic translation elongation factor 2b)	eef2b
E9QHX8	Signal sequence receptor, delta	ssr4
Q7ZV05	Ribosomal protein S11	rps11
Q6DGU9	Glutathione S-transferase kappa (EC 2.5.1.18)	gstk1
P62247	40S ribosomal protein S8	rps8
F1QPA8	Sulfotransferase (EC 2.8.2.-)	sult3st1
F1QHJ4	Death-associated protein	dap
A0A0G2L3Z2	Thymidine phosphorylase (TP) (EC 2.4.2.4) (TdRPase)	tymp
Q6P5M9	Tubulin beta chain	tubb4b
F1R7X5	Succinate--CoA ligase [GDP-forming] subunit beta, mitochondrial (EC 6.2.1.4) (GTP-specific succinyl-CoA synthetase subunit beta) (G-SCS) (GTPSCS) (Succinyl-CoA synthetase beta-G chain) (SCS-betaG)	suclg2
A0A0R4IGQ7	Peptidylprolyl isomerase (EC 5.2.1.8)	fkbp3
F1QTL9	Heterogeneous nuclear ribonucleoprotein A0b	hnrnpa0b
Q6GQN6	Acaa1 protein (Acetyl-CoA acyltransferase 1) (Acetyl-Coenzyme A acyltransferase 1)	acaa1
F1QUE3	Ubiquinol-cytochrome c reductase core protein 1	uqcrc1
Q803F6	40S ribosomal protein SA (37 kDa laminin receptor precursor) (37LRP) (37/67 kDa laminin receptor) (LRP/LR) (67 kDa laminin receptor) (67LR) (Laminin receptor 1) (LamR) (Laminin-binding protein precursor p40) (LBP/p40)	rpsa
F1QUQ7	Proteasome 26S subunit, ATPase 3	psmc3
F1QFW5	Ribophorin II (Fragment)	rpn2
Q6PBX2	SAR1a gene homolog 2 (S. cerevisiae) (Secretion-associated, Ras-related GTPase 1B)	sar1b
Q6ZM23	Cytochrome c oxidase subunit VIc	cox6c
Q8JGR4	60S ribosomal protein L24	rpl24
F1QHJ1	40S ribosomal protein S26	rps26l
Q499B2	Signal peptidase complex subunit 1 (Signal peptidase complex subunit 1 homolog (S. cerevisiae))	spcs1
E9QD12	Dicarbonyl/L-xylulose reductase (Fragment)	dcxr
Q08BS3	Retinoblastoma-binding protein 9 (Si:ch211-258l4.7)	rbbp9
Q8AYH1	17-beta-hydroxysteroid dehydrogenase type 4 (Hsd17b4 protein) (Hydroxysteroid (17-beta) dehydrogenase 4)	hsd17b4
B0R1D0	Novel protein (Zgc:63709) (Proteasome 26S subunit, ATPase 4)	psmc4
Q7SXP0	Vesicle-trafficking protein SEC22b-B (SEC22 vesicle-trafficking protein homolog B-B)	sec22bb
A0A0R4IYD0	40S ribosomal protein S27	zgc
F1QG78	Phosphatidylinositide phosphatase SAC1-B	sacm1lb
A0A0R4IPH2	Tubulin beta chain	tubb4b
Q6P5K5	Ribosomal protein, large, P1	rplp1
Q6DGL9	Ribosomal protein L38 (Rpl38 protein)	rpl38
Q6Q415	60S ribosomal protein L36	rpl36

## Sheet: Cluster 6
Protein accession	Protein name	Gene name
Q7SXM1	Cytochrome c oxidase subunit	cox6b2
Q9MIX8	Cytochrome b (Complex III subunit 3) (Complex III subunit III) (Cytochrome b-c1 complex subunit 3) (Ubiquinol-cytochrome-c reductase complex cytochrome b subunit)	mt
F1QDQ1	Coatomer subunit alpha	copa
Q567V5	Novel protein similar to vertebrate small nuclear ribonucleoprotein D2 polypeptide 16.5kDa (SNRPD2) (Si:dkey-113g17.2) (Small nuclear ribonucleoprotein D2 polypeptide)	snrpd2
Q8JHI0	Solute carrier family 25 (mitochondrial carrier; adenine nucleotide translocator), member 5 (Solute carrier family 25 alpha, member 5) (Solute carrier family 25 member 5 protein) (Solute carrier family 25, member 5)	slc25a5
Q6IQA7	Histocompatibility (minor) 13 (Hm13 protein) (Signal peptide peptidase)	hm13
Q6P6E0	ATP synthase, H+-transporting, mitochondrial F0 complex, subunit g (Atp5l protein)	atp5l
E7FDF9	Zmp:0000000758	zmp
Q6P948	Pyruvate dehydrogenase E1 component subunit alpha (EC 1.2.4.1)	pdha1a
Q5SPA3	Acetyl-CoA acetyltransferase 2	acat2
I3IT87	AP-2 complex subunit mu-B	ap2m1b
Q6DGX4	Glycine cleavage system H protein	gcshb
A0A0R4IP07	Elongation factor 1-gamma	eef1g
A0A0R4IQZ3	Enoyl-CoA delta isomerase 1	eci1
Q6DGA6	Allantoicase (EC 3.5.3.4) (Allantoate amidinohydrolase)	allc
Q7ZUG6	Ribosomal protein L30	rpl30
Q6AZW2	Alcohol dehydrogenase [NADP(+)] A (EC 1.1.1.2) (Aldehyde reductase-A) (Aldo-keto reductase family 1 member A1-A)	akr1a1a
Q6PUF3	Hydroxysteroid 11-beta-dehydrogenase 1-like protein (EC 1.1.1.-) (11-beta-hydroxysteroid dehydrogenase type 3) (11-DH3) (11-beta-HSD3)	hsd11b1l
Q6NWJ5	Tubulin alpha chain	tuba8l4
F6NGD6	Zgc:101540	slc27a2b
F1QSB3	Signal recognition particle receptor, B subunit	srprb
F1QJC1	Dehydrogenase/reductase (SDR family) member 9	dhrs9
A0A0R4IFJ4	Pyruvate carboxylase (EC 6.4.1.1)	pcxa
Q6NWE0	Ester hydrolase C11orf54 homolog (EC 3.1.-.-)	zgc
A5PL98	Succinate dehydrogenase [ubiquinone] iron-sulfur subunit, mitochondrial (EC 1.3.5.1) (Iron-sulfur subunit of complex II) (Ip)	sdhb
E9QCF1	Biliverdin reductase B	blvrb
B0UYS4	Deoxyribose-phosphate aldolase (putative)	dera
A3KQE8	Phosphoribosyl pyrophosphate synthetase 1A	prps1a
A0A0R4IGT3	Dolichyl-phosphate mannosyltransferase polypeptide 1, catalytic subunit	dpm1
E7EZ94	Glutathione S-transferase theta 1a	gstt1a
I3IRW7	4-aminobutyrate aminotransferase	abat
Q1LY08	Coproporphyrinogen oxidase	cpox
Q6P2V4	Hgd protein (Homogentisate 1,2-dioxygenase)	hgd
E7FD66	Aminoadipate-semialdehyde synthase	aass
Q6NYL5	Alanine aminotransferase 2-like (ALT2) (EC 2.6.1.2) (Glutamate pyruvate transaminase 2) (GPT 2) (Glutamic--alanine transaminase 2) (Glutamic--pyruvic transaminase 2)	gpt2l
Q7T337	Fructose-1,6-bisphosphatase 1b	fbp1b
H9GXR0	Uncharacterized protein	unknown
F1QTW8	Matrin 3-like 1.1 (Fragment)	matr3l1
F1R3V8	Coiled-coil domain-containing protein 47	ccdc47
F1Q6E1	4-hydroxyphenylpyruvate dioxygenase	hpda
Q6NV37	Glycogenin 1 (Glycogenin 1a) (Gyg1 protein)	gyg1a
B0S5C5	Acetyl-CoA acyltransferase 2	acaa2
F1QEJ5	Ubiquinol-cytochrome c reductase, complex III subunit VII	uqcrq
Q5U3G0	Progesterone receptor membrane component 1	pgrmc1
Q7SXK5	Probable imidazolonepropionase (EC 3.5.2.7) (Amidohydrolase domain-containing protein 1)	amdhd1
A0A0R4IUZ2	Aldehyde dehydrogenase 2 family (mitochondrial), tandem duplicate 1	aldh2
A0A0G2L6T1	Electron transfer flavoprotein alpha subunit	unknown
F8W4R3	Adenine phosphoribosyltransferase	aprt
B8JIS1	ATP synthase, H+-transporting, mitochondrial Fo complex, subunit B1	atp5f1
A7E2L0	Dolichyl-diphosphooligosaccharide--protein glycosyltransferase subunit DAD1 (Oligosaccharyl transferase subunit DAD1)	dad1
E7F1Y3	Si:zfos-411a11.2	si
Q6IQM2	Cytochrome c	cyc
